# Supplementary material for: Specialized sledge dogs accompanied Inuit dispersal across the North American Arctic
Source: Proc Biol Sci. 2019 Nov 27;286(1916):20191929. doi: 10.1098/rspb.2019.1929 (PMC6939252; doi:10.1098/rspb.2019.1929)
Supplement: Datasets S1 [file rspb20191929supp4.xlsx]

## Sheet: Sheet1
Sample Number	Depository ID	ZMK P ID	GMM ID	Sampled By	Extraction Lab	Extraction Date	DNA Present	DNA Species (BLAST)	Sanger Haplotype (356-370 bp)	D-LOOP Sequence	Next Gen Sequence	Next Gen (Avg MT Coverage)	3X Tree Haplogroup	10X Tree Haplogroup	Country/ State	Region	Site Name/Locality	Site /Feature Number	Est Calendar Age	Cultural Period	Cultural Classification	Provenience	Taxon	Element	Portion	Side	Age	Sex	Taphonomy	Identified/Submitted By	Museum/ Institution	Excavated/ Collected By	Excavation/ Collection Date	References	Comments
2040	SMK MK 1051	P42/2017KMG	ZMK_P42	Sinding, M-H.S.	Copenhagen		Yes	Dog	NA	NA	Yes	201	NA	A2a	Canada	Igloolik, Foxe Basin, Nunavut	Kaleruserk		1922/23	Historical	Historical										Natural History Museum of Denmark
2041	CN2041			Sinding, M-H.S.	Copenhagen		Yes	Dog	NA	NA	Yes	78	NA	NA	Canada	Lyon Inlet, Melville Pen., Nunavut	Danske Øen		1923	Historical	Historical										Natural History Museum of Denmark
2587	CN2587			Sinding, M-H.S.	Copenhagen		Yes	Dog	NA	NA	Yes	397	NA	A1b	Greenland	East Greenland	Angmagsalik		1934	Historical	Historical										Natural History Museum of Denmark
3294	CN3294			Sinding, M-H.S.	Copenhagen		Yes	Dog	NA	NA	Yes	108	NA	A1b	Greenland	East Greenland	Scoresbysund		1928	Historical	Historical										Natural History Museum of Denmark
30491	30491			Sinding, M-H.S.	Copenhagen		No	Dog	NA	NA	Yes	0	NA	NA	Greenland	West Greenland	Aito		1844	Historical	Historical			Clothing - Man's stocking							National Museum of Denmark
31369	31369			Sinding, M-H.S.	Copenhagen		Yes	Dog	NA	NA	Yes	2	NA	NA	Greenland	West Greenland	Godthåb distrikt		1892	Historical	Historical			Clothing - Girl's Parka							National Museum of Denmark
31867	31867			Sinding, M-H.S.	Copenhagen		Yes	Dog	NA	NA	Yes	29	A2a	A2a	Greenland	North West Greenland, Thule District	North Star Bay		1909	Historical	Historical			Clothing - Man's parka							National Museum of Denmark
32135	32135			Sinding, M-H.S.	Copenhagen		Yes	Dog	NA	NA	Yes	31	NA	NA	Greenland	East Greenland	Tasiilak		1911	Historical	Historical			Clothing - Man's mittens							National Museum of Denmark
32179	32179			Sinding, M-H.S.	Copenhagen		Yes	Dog	NA	NA	Yes	12	NA	NA	Greenland	East Greenland	Tasiilak		1911	Historical	Historical			Clothing - Woman's stockings							National Museum of Denmark
32987	32987			Sinding, M-H.S.	Copenhagen		Yes	Dog	NA	NA	Yes	211	A2a	A2a	Greenland	North West Greenland	Uummannaq		1926	Historical	Historical			Clothing - Man's stockings							National Museum of Denmark
35561	35561			Sinding, M-H.S.	Copenhagen		Yes	Dog	NA	NA	Yes	437	NA	A1b	Greenland	East Greenland	Tasiilak		1932	Historical	Historical			Clothing - Wristlets							National Museum of Denmark
36635	36635			Sinding, M-H.S.	Copenhagen		No	Dog	NA	NA	Yes	0	NA	NA	USA	Alaska	St. Lawrence Island		1939	Historical	Historical										National Museum of Greenland
36960	36960			Sinding, M-H.S.	Copenhagen		No	Dog	NA	NA	Yes	0	NA	NA	USA	Alaska	Point Hope		1926	Historical	Historical										National Museum of Greenland
37233	37233			Sinding, M-H.S.	Copenhagen		No	Dog	NA	NA	Yes	0	NA	NA	Canada	Yukon/Northwest Territories	Mackenzie River		1926	Historical	Historical										National Museum of Greenland
66272	66272			Sinding, M-H.S.	Copenhagen		Yes	Dog	NA	NA	Yes	33	NA	NA	USA	Alaska	Kodiak		1854	Historical	Historical										National Museum of Greenland
67733	67733			Sinding, M-H.S.	Copenhagen		No	Dog	NA	NA	Yes	0	NA	NA	Russia	Siberia	Yenisei & Lena		1862	Historical	Historical
67941	67941			Sinding, M-H.S.	Copenhagen		Yes	Dog	NA	NA	Yes	79	A1a	A1a	Greenland		Qeqertarssuatsiaq		1918	Historical	Historical			Clothing - Man's stockings							National Museum of Denmark
69971	69971			Sinding, M-H.S.	Copenhagen		No	Dog	NA	NA	Yes	0	NA	NA	Canada		Labrador		1924	Historical	Historical										National Museum of Denmark
70111	70111			Sinding, M-H.S.	Copenhagen		No	Dog	NA	NA	Yes	0	NA	NA	Canada		Hoffenthal		1851	Historical	Historical										National Museum of Denmark
01.P09.B1.1077	NA			Brown, S.K. (VGL)	UC Davis	11/13/2012	Yes	Dog	A1b	GCTGAGATTCTTCTTAAACTATTCCCTGACACCCCTACATTCATATATTGAATCACCCCTACTGTGCTATGTCAGTATCTCCAGGTAAACCCTTCTCNCCCTCCCCNTATGTACGTCGTGCATTAATGGTTTGCCCCATGCATATAAGCATGTACATAATATTATATCCTTACATAGGANCATATTAACTCAATCTCATAGTTCACTGATCTATCAACAGTAATCAAATGCATATCACTTAGTCCAATAAGGGCTTAATCACCATGCCTCGAGAAACCATNNNCAACCCTTGCTCGTANATGTCCCTCTTCTCGCTCCGGGCCCATACTANACGTGGGGGTTACTATCATGAAACTATACCTGGCATCTGGNTTCTTACTTCAGGGCCANNNTNANACT…	Yes	7.4	A1b	NA	Russia	Chukotka	Pajpel'gak, Chukotka	Pajpel'gak, Burial 1	AD 700 - 1200	Birnirk	Inuit	Unit ZH, Level 11	C. l. familiaris	P3, P4; metapodial, 6 phalanges, patella	complete	L	adult			Vasyukov, Mitya	Russian Academy of Sciences		2009		FS# 1077; only teeth sampled for DNA
02.P04.H1.128	NA			Brown, S.K. (VGL)	UC Davis	10/22/2012	Yes	Dog	A1b	ATGTACGTCGTGCATTAATGGTTTGCCCCATGCATATAAGCATGTACATAATATTATATCCTTACATAGGACATATTAACTCAATCTCATAGTTCACTGATCTATCAACAG-TAATCAAATGCATATCACTTAGTCCAATAAGGGCTTAATCACCATGCCTCGAGAAACCATCAACCCTTGCTCGTAATGTCCCTCTTCTCGCTCCGGGCCCATACTAACGTGGGGGTTACTATCATGAAACTATACCTGGCATCTGGTTCTTACTTCAGGGCCATAA-CTTTATTTACTCCAATCCTACTAATTCTCGCAAATGGGACATCTCGATGGACTAATGACTAATCAGCCCATGATCACA	Yes	4.8	NA	NA	Russia	Chukotka	Pajpel'gak, Chukotka	Pajpel'gak, House 1	AD 700 - 1200	Birnirk	Inuit	Unit G, Level 11	C. l. familiaris	mandible	fragment + m1	L	adult			Vasyukov, Mitya	Russian Academy of Sciences		2004		FS# 128
03.P04.H1.1024	NA			Brown, S.K. (VGL)	UC Davis	11/13/2012	Yes	Wolf	282135China (KU696391.2)	GCTGAAATTCTTCTTAAACTATTCCCTGACACCCCTACATTCATATATTGAATCACCCCTACTGTGCTATGTCAGTATCTCCAGGTAAACCCTTCTTNCCCTCCCCNTATGTACGTCGTGCATTAGTGGTTTGCCCCATGCATATAAGCATGTACATAATATTATATCCTTACATAGGANCATATTAACTCAATCTCACAATTCACTGATCTATCAGCAGTAATCAAATGCATATCACTTAGTCCAATAAGGGCTTAATCACCATGCCTCGAGAAACCATNNNCAACCCTTGCTCGTANATGTCCCTCTTCTCGCTCCGGGCCCATACTANACGTGGGGGTTACTATCATGAAACTATACCTGGCATCTGGNTTCTTACCTCAGGGCCANNNTNANACT…	Yes	13.3	WOLF	X-Clade	Russia	Chukotka	Pajpel'gak, Chukotka	Pajpel'gak, House 1	AD 700 - 1200	Birnirk	Inuit	Unit G, Level 11	C. l. familiaris	mandible	p3-m2	L	adult			Vasyukov, Mitya	Russian Academy of Sciences		2004		FS# 1024
04.P04.H1.151	NA			Brown, S.K. (VGL)	UC Davis	11/13/2012	Yes	Dog	A1b	NNNNNNNNNNNNNNNNNNNNNNNNNNNNNNNNNNNNNNNNNNNNNNNNNNNNNNNNNNNNNNNNNNNNNNNNNNNNNNNNNNNNNNNNNNNNNNNNNNCCCTCCCCNTATGTACGTCGTGCATTAATGGTTTGCCCCATGCATATAAGCATGTACATAATATTATATCCTTACATAGGANCATATTAACTCAATCTCATAGTTCACTGATCTATCAACAGTAATCNAATGCATATCACTTAGTCCAATAAGGGCTTAATCACCATGCCTCGAGAAACNNNNNNNNNNNNNNNNNNNNNNNNNNNNNNNNNNNNNNNNNNNNNNNNNNNNNNNNNNNNNNNNNNNNNNNNNNNNNNNNNNNNNNNNNNNNNNNNNNNNNNNNNNNNNNNNNNNNNNNNNN…	No	NA	NA	NA	Russia	Chukotka	Pajpel'gak, Chukotka	Pajpel'gak, House 1	AD 700 - 1200	Birnirk	Inuit	Unit G, Level 11	C. l. familiaris	mandible	c, p2-4, m1-2	L	adult			Vasyukov, Mitya	Russian Academy of Sciences		2004		FS# 151
05.P04.H1.1612	NA			Brown, S.K. (VGL)	UC Davis	10/8/2012	Yes	Dog	A1b	CCCCTATGTACGTCGTGCATTAATGGTTTGCCCCATGCATATAAGCATGTACATAATATTATATCCTTACATAGGACATATTAACTCAATCTCATAGTTCACTGATCTATCAACAGTAATCAAATGCATATCACTTAGTCCAATAAGGGCTTAATCACCATGCCTCGAGAAACCATCAACCCTTGCTCGTAATGTCCCTCTTCTCGCTCCGGGCCCATACTAACGTGGGGGTTACTATCATGAAACTATACCTGGCATCTGGTTCTTACTTCAGGGCCATAACTTTATTTACTCCAATCCTACTAATTCTCGCAAATGGGACATCTCGATGGACTAATGACTAATCAGCCCATGAT	Yes	0	NA	NA	Russia	Chukotka	Pajpel'gak, Chukotka	Pajpel'gak, House 1	AD 700 - 1200	Birnirk	Inuit	Unit G, Level 11	C. l. familiaris	mandible	fragment + deciduous p4	L	juvenile			Vasyukov, Mitya	Russian Academy of Sciences		2004		FS# 1612
06.P05.H2.200	NA			Brown, S.K. (VGL)	UC Davis	11/13/2012	No	Fail	Fail	NA	No	NA	NA	NA	Russia	Chukotka	Pajpel'gak, Chukotka	Pajpel'gak, House 2	AD 700 - 1200	Birnirk	Inuit	Unit D, Level 7	C. l. familiaris	tibia	fragment	R				Vasyukov, Mitya	Russian Academy of Sciences		2005		FS# 200
07.P05.H2.959	NA			Brown, S.K. (VGL)	UC Davis	11/13/2012	No	Fail	Fail	NA	No	NA	NA	NA	Russia	Chukotka	Pajpel'gak, Chukotka	Pajpel'gak, House 2	AD 700 - 1200	Birnirk	Inuit	Unit D, Level 8	C. l. familiaris	tibia	fragment	L				Vasyukov, Mitya	Russian Academy of Sciences		2005		FS# 959
08.P05.H2.961	NA			Brown, S.K. (VGL)	UC Davis	2/13/2013	Yes	Dog	A1b	CTGAGATTCTTCTTAAACTATTCCCTGACACCCCTACATTCATATATTGAATCACCCCTACTGTGCTATGTCAGTATCTCCAGGTAAACCCTTCTCCCCTCCCCTATGTACGTCGTGCATTAATGGTTTGCCCCATGCATATAAGCATGTACATAATATTATATCCTTACATAGGACATATTAACTCAATCTCATAGTTCACTGATCTATCAACAGTAATCAAATGCATATCACTTAGTCCAATAAGGGCTTAATCACCATGCCTCGAGAAACCATCAACCCTTGCTCGTAATGTCCCTCTTCTCGCTCCGGGCCCATACTAACGTGGGGGTTACTATCATGAAACTATACCTGGCATCTGGTTCTTACTTCAGGGCCATAACTTTATTTACTCCAATC…	Yes	5.5	NA	NA	Russia	Chukotka	Pajpel'gak, Chukotka	Pajpel'gak, House 2	AD 700 - 1200	Birnirk	Inuit	Unit D, Level 8	C. l. familiaris	tibia	fragment	L				Vasyukov, Mitya	Russian Academy of Sciences		2005		FS# 961
09.P05.H2.894	NA			Brown, S.K. (VGL)	UC Davis	2/13/2013	Yes	Dog	A1b	CTGAGATTCTTCTTAAACTATTCCCTGACACCCCTACATTCATATATTGAATCACCCCTACTGTGCTATGTCAGTATCTCCAGGTAAACCCTTCTCCCCTCCCCTATGTACGTCGTGCATTAATGGTTTGCCCCATGCATATAAGCATGTACATAATATTATATCCTTACATAGGACATATTAACTCAATCTCATAGTTCACTGATCTATCAACAGTAATCAAATGCATATCACTTAGTCCAATAAGGGCTTAATCACCATGCCTCGAGAAACCATCAACCCTTGCTCGTAATGTCCCTCTTCTCGCTCCGGGCCCATACTAACGTGGGGGTTACTATCATGAAACTATACCTGGCATCTGGTTCTTACTTCAGGGCCATAACTTTATTTACTCCAATC…	Yes	23.6	A1b	A1b	Russia	Chukotka	Pajpel'gak, Chukotka	Pajpel'gak, Area D5	AD 1200 - 1600	Punuk/Thule	Inuit	Unit D, Level 5	C. l. familiaris	tibia	fragment	R				Vasyukov, Mitya	Russian Academy of Sciences		2005		FS# 894
10.P05.AD5.895	NA			Brown, S.K. (VGL)	UC Davis	2013-02-13	Yes	Dog	Fail	NA	Yes	1.9; 1.3	NA	NA	Russia	Chukotka	Pajpel'gak, Chukotka	Pajpel'gak, Area D5	AD 1200 - 1600	Punuk/Thule	Inuit	Unit D, Level 5	C. l. familiaris	tibia	complete	R	adult			Vasyukov, Mitya	Russian Academy of Sciences		2005		FS# 895
11.KG90.H1.658	NA			Brown, S.K. (VGL)	UC Davis	2012-11-26	Yes	Fail	Fail	NA	No	NA	NA	NA	Russia	Chukotka	Kaniskak-G, Chukotka	Kaniskak-G, House 1	AD 1200 - 1600	Punuk/Thule	Inuit	Unit A-B/4-6, Level 2	C. l. familiaris	ulna	complete	L	adult			Vasyukov, Mitya	Russian Academy of Sciences		1990		FS# 658
12.KG90.H1.747	NA			Brown, S.K. (VGL)	UC Davis	2013-02-13	Yes	Dog	A26	NNNNNNNNNNNNNNNNNNNNNNNNNNNNNNNNNNNNNNNNNNNNNNNNNNNNNNNNNNNNNNNNNNNNNNNNNNNNNNNNNNNNNNNNNNNNNNNNNNCCCTCCCCNTATGTACGTCGTGCATTAGTGGTTTGCCCCATGCATATAAGCATGTACATAATATTATATCCTTACATAGGANCATATTAACTCAATCTCATAATTCACTGATCTATCAACAGTAATCGAATGCATATCACTTAGTCCAATAAGGGCTTAATCACCATGCCTCGAGAAACCATNNNCAACCCTTGCTCGTANATGTCCCTCTTCTCGCTCCGGGCCCATACTANACGTGGGGGTTACTATCATGAAACTATACCTGGCATCTGGNTTCTTACTTCAGGGCCANNNTNANACT…	No	NA	NA	NA	Russia	Chukotka	Kaniskak-G, Chukotka	Kaniskak-G, House 1	AD 1200 - 1600	Thule	Inuit	Unit B-4, Level 4	C. l. familiaris	ulna	fragment	L	fused			Vasyukov, Mitya	Russian Academy of Sciences		1990		FS# 747
13.KG90.H1.708	NA			Brown, S.K. (VGL)	UC Davis	9/17/2012	No	Fail	Fail	NA	No	NA	NA	NA	Russia	Chukotka	Kaniskak-G, Chukotka	Kaniskak-G, House 1	AD 1200 - 1600	Thule	Inuit	Unit B-5, Level 4-5	C. l. familiaris	ulna	fragment	L	fused			Vasyukov, Mitya	Russian Academy of Sciences		1990		FS# 708
14.EC95.G329B.518	NA			Brown, S.K. (VGL)	UC Davis	11/13/2012	Yes	Dog	A2a	NNNNNNNNNNNNNNNNNNNNNNNNNNNNNNNNNNNNNNNNNNNNNNNNNNNNNNNNNNNNNNNNNNNNNNNNNNNNNNNNNNNNNNNNNNNNNNNNNNNNNNNCCCNTATGTACGTCGTGCATTAATGGTTTGCCCCATGCATATAAGCATGTACATAATATTATATCCTTACATAGGANCATATTAACTCAATCTCATAGTTCACTGATCTACCAACAGTAATCGAATGCATATCACTTAGTCCAATAAGGGCTTAATCACCATGCCTCGAGAAACCATNNNCAACCCTTGCTCGTANATGTCCCTCTTCTCGCTCCGGGCCCATACTANACGTGGGGGTTACTATCATGAAACTATACCTGGCATCTGGNTTCTTACTTCAGGGCCANNNTNANACT…	Yes	1	NA	NA	Russia	Chukotka	Ekven Cemetery, Chukotka	Ekven, Grave 329B	AD 700 - 1200	Birnirk	Inuit	n/a	C. l. familiaris	cranium	dens from maxillare	L	adult			Vasyukov, Mitya	Russian Academy of Sciences		1995		FS# 518
15.EC95.G329B.651	NA			Brown, S.K. (VGL)	UC Davis	11/13/2012	Yes	Dog	A2a	NNNNNNNNNNNNNNNNNNNNNNNNNNNNNNNNNNNNNNNNNNNNNNNNNNNNNNNNNNNNNNNNNNNNNNNNNNNNNNNNNNNNNNNNNNNNNNNNNNNNNNCCCCNTATGTACGTCGTGCATTAATGGTTTGCCCCATGCATATAAGCATGTACATAATATTATATCCTTACATAGGANCATATTAACTCAATCTCATAGTTCACTGATCTACCAACAGTAATCGAATGCATATCACTTAGTCCAATAAGGGCTTAATCACCATGCCTCGAGAAACAAGNNNNNNNNNNNNNNNNNNNNNNNNNNNNNNNNNNNNNNNNNNNNNNNNNNNNNNNNNNNNNNNNNNNNNNNNNNNNNNNNNNNNNNNNNNNNNNNNNNNNNNNNNNNNNNNNNNNNNNN…	Yes	0.4	NA	NA	Russia	Chukotka	Ekven Cemetery, Chukotka	Ekven, Grave 329A	AD 700 - 1200	Birnirk	Inuit	n/a	C. l. familiaris	mandible	dens from mandibular	L	adult			Vasyukov, Mitya	Russian Academy of Sciences		1995		FS# 651
16.V89.C9.239	NA			Brown, S.K. (VGL)	UC Davis	10/8/2012	Yes	Dog	A1b	ATGTACGTCGTGCATTAATGGTTTGCCCCATGCATATAAGCATGTACATAATATTATATCCTTACATAGGACATATTAACTCAATCTCATAGTTCACTGATCTATCAACAG-TAATCAAATGCATATCACTTAGTCCAATAAGGGCTTAATCACCATGCCTCGAGAAACCATCAACCCTTGCTCGTAATGTCCCTCTTCTCGCTCCGGGCCCATACTAACGTGGGGGTTACTATCATGAAACTATACCTGGCATCTGGTTCTTACTTCAGGGCCATAA-CTTTATTTACTCCAATCCTACTAATTCTCGCAAATGGGACATCTCGATGGACTAATGACTAATCAGCCCATGATCACA	Yes	0	NA	NA	Russia	Chukotka	Verbljuzhka, Chukotka	n/a	AD 400 - 700		Siberian Holocene	Cut #9, 110-120 cm	C. l. familiaris	mandible	dens + piece of mandibula	L	adult			Vasyukov, Mitya	Russian Academy of Sciences		1989		FS# 239
17.KM90.2/11.204	NA			Brown, S.K. (VGL)	UC Davis	11/26/2012	Yes	Dog	A2a	NNNNNNNNNNNNNNNNNNNNNNNNNNNNNNNNNNNNNNNNNNNNNNNNNNNNNNNNNNNNNNNNNNNNNNNNNNNNNNNNNNNNNNNNNNNNNNNNTNCCCTCCCCNTATGTACGTCGTGCATTAATGGTGTGCCCGATGCATATAAGCATGTACATAATATTATATCCTTACATAGGANCATATTAACTCAATCTCATAGTTCACTGATCTACNAACAGTAATCGAATGCATATCACTTAGTCCAATAAGGGCTTAATCACCATGCCTCGAGAAACCATNNNCAACCCTTGCTCGTANATGTCCCTCTTCTCGCTCCGGGCCCATACTANACGTGGGGGTTACTATCATGAAACTATACCTGGCATCTGGNTTCTTACTTCAGGGCCANNNTNANACT…	No	NA	NA	NA	Russia	Chukotka	Kaniskak-M, Chukotka	Kaniskak-M	BC 300 - AD 400		Siberian Holocene	Unit 2, Level 11	C. l. familiaris	cranium	fragment	n/a	adult			Vasyukov, Mitya	Russian Academy of Sciences		1990		FS# 204
18.KM90.2/11.971	NA			Brown, S.K. (VGL)	UC Davis	9/17/2012	Yes	Dog	A2a	NNNNNNNNNNNNNNNNNNNNNNNNNNNNNNNNNNNNNNNNNNNNNNNNNNNNNNNNNNNNNNNNNNNNNNNNNNNNNNNNNNNNNNNNNNNNNNNNNNCCCTCCCCNTATGTACGTCGTGCATTAATGGTTTGCCCCATGCATATAAGCATGTACATAATATTATATCCTTACATAGGANCATATTAACTCAATCTCATAGTTCACTGATCTACCAACAGTAATCGAATGCATATCACTTAGTCCAATAAGGGCTTAATCACCATGCCTCGAGAAACCATNNNCAACCCTTGCTCGTANATGTCCCTCTTCTCGCTCCGGGCCCATACTANACGTGGGGGTTACTATCATGAAACTATACCTGGCATCTGGNTTCTTACTTCAGGGCCANNNTNANACT…	Yes	1.7; 1.8b	NA	NA	Russia	Chukotka	Kaniskak-M, Chukotka	Kaniskak-M	BC 300 - AD 400		Siberian Holocene	Unit 2, Level 11	C. l. familiaris	cranium	fragment	n/a	adult			Vasyukov, Mitya	Russian Academy of Sciences		1990		FS# 971
19.KM90.2/11.937	NA			Brown, S.K. (VGL)	UC Davis	10/22/2012	Yes	Dog	A2a	ATGTACGTCGTGCATTAATGGTTTGCCCCATGCATATAAGCATGTACATAATATTATATCCTTACATAGGACATATTAACTCAATCTCATAGTTCACTGATCTATCAACAG-TAATCAAATGCATATCACTTAGTCCAATAAGGGCTTAATCACCATGCCTCGAGAAACCATCAACCCTTGCTCGTAATGTCCCTCTTCTCGCTCCGGGCCCATACTAACGTGGGGGTTACTATCATGAAACTATACCTGGCATCTGGTTCTTACTTCAGGGCCATAA-CTTTATTTACTCCAATCCTACTAATTCTCGCAAATGGGACATCTCGATGGACTAATGACTAATCAGCCCATGATCACA	Yes	0.8	NA	NA	Russia	Chukotka	Kaniskak-M, Chukotka	Kaniskak-M	BC 300 - AD 400		Siberian Holocene	Unit 2, Level 11	C. l. familiaris	cranium	maxilla fragment	n/a	adult			Vasyukov, Mitya	Russian Academy of Sciences		1990		FS# 937
1988-213-374	NA			Brown, S.K. (VGL)	UC Davis	5/29/2014	Yes	Fail	Fail	NA	Yes	1.5	NA	NA	Iceland	Álftanes	Bessastaðir	n/a	AD 1400 - 1500	Medieval	Other	Black Layer, 7 masl (Við snið II Svarta lagið um 7 m. y. s.)	C. l. familiaris	cranium	complete (P4 only)					Pálsdóttir, Albína H.	National Museum of Iceland	National Museum of Iceland	9/1988		Database# 30
20.KM90.2/11.1700	NA			Brown, S.K. (VGL)	UC Davis	11/26/2012	No	Fail	Fail	NA	No	NA	NA	NA	Russia	Chukotka	Kaniskak-M, Chukotka	Kaniskak-M	BC 300 - AD 400		Siberian Holocene	Unit 2, Level 11	C. l. familiaris	cranium	maxillary fragment	R	adult			Vasyukov, Mitya	Russian Academy of Sciences		1990		FS# 1700
2008-32-1184	NA			Brown, S.K. (VGL)	UC Davis	5/29/2014	Yes	Dog	Fail	NA	Yes	0.2	NA	NA	Iceland	Reykjavík	Alþingisreitur, Reykjavík	2008-32	AD 1226 - 1500	Medieval	Other	Phase III; Waste Deposit 44516; Unit 45214	C. l. familiaris	humerus	complete		adult			Pálsdóttir, Albína H.	National Museum of Iceland	Vala Garðarsdóttir	2008		Database# 749; likely a large-sized dog
2008-32-1185	NA			Brown, S.K. (VGL)	UC Davis	2014-12-06	No	Fail	Fail	NA	No	NA	NA	NA	Iceland	Reykjavík	Alþingisreitur, Reykjavík	2008-32	AD 870 - 1226	Norse/Viking	Norse	Phase IV; Cultural Layer 63679; Unit 64156	C. l. familiaris	mandible	body fragment		adult			Pálsdóttir, Albína H.	National Museum of Iceland	Vala Garðarsdóttir	2008		Database# 1219; measurement #17 (von den Driesch) suggests dog
2008-32-1199	NA			Brown, S.K. (VGL)	UC Davis	2014-12-06	No	Fail	Fail	NA	No	NA	NA	NA	Iceland	Reykjavík	Alþingisreitur, Reykjavík	2008-32	AD 1226 - 1500	Medieval	Other	Phase III; Waste Deposit 51276; Unit 252922	C. l. familiaris	femur	complete		adult			Pálsdóttir, Albína H.	National Museum of Iceland	Vala Garðarsdóttir	2008		Database# 817; 1 of 3 bones from partially articulated hind leg (pelvis, femur, tibia)
2008-32-1208	NA			Brown, S.K. (VGL)	UC Davis	2014-12-06	No	Fail	Fail	NA	No	NA	NA	NA	Iceland	Reykjavík	Alþingisreitur, Reykjavík	2008-32	AD 1226 - 1500	Medieval	Other	Phase III; Waste Deposit 44516	C. l. familiaris/ V. lagopus	tibia	complete		adult			Pálsdóttir, Albína H.	National Museum of Iceland	Vala Garðarsdóttir	2008		Database# 850; could be either dog or fox
2008-32-1221	NA			Brown, S.K. (VGL)	UC Davis	2014-12-06	Yes	BACTERIA	Fail	NA	No	NA	NA	NA	Iceland	Reykjavík	Alþingisreitur, Reykjavík	2008-32	AD 870 - 1226	Norse/Viking	Norse	Phase IV; Waste Deposit 47136; Unit 25294	C. l. familiaris	canine	complete		adult			Pálsdóttir, Albína H.	National Museum of Iceland	Vala Garðarsdóttir	2008		Database# 1220; probably dog by tooth is very short and does not match comparative
2008-32-1253	NA			Brown, S.K. (VGL)	UC Davis	2014-12-06	No	Fail	Fail	NA	No	NA	NA	NA	Iceland	Reykjavík	Alþingisreitur, Reykjavík	2008-32	AD 870 - 1226	Norse/Viking	Norse	Phase IV; Cultural Layer 66113; sandy turf, midden	C. l. familiaris	metatarsal 3	complete		adult			Pálsdóttir, Albína H.	National Museum of Iceland	Vala Garðarsdóttir	2008		Database# 816; identified as dog based on size
2008-32-1276	NA			Brown, S.K. (VGL)	UC Davis	5/29/2014	No	Fail	Fail	NA	No	NA	NA	NA	Iceland	Reykjavík	Alþingisreitur, Reykjavík	2008-32	AD 870 - 1226	Norse/Viking	Norse	Phase IV; Waste Deposit 47136	C. l. familiaris	tibia	distal		adult			Pálsdóttir, Albína H.	National Museum of Iceland	Vala Garðarsdóttir	2008		Database# 768; medial malleolus broken; size matches fox
2008-32-1321	NA			Brown, S.K. (VGL)	UC Davis	2014-12-06	Yes	BACTERIA	Fail	NA	No	NA	NA	NA	Iceland	Reykjavík	Alþingisreitur, Reykjavík	2008-32	AD 870 - 1226	Norse/Viking	Norse	Phase IV; Waste Deposit 69234	C. l. familiaris	ulna	complete		adult			Pálsdóttir, Albína H.	National Museum of Iceland	Vala Garðarsdóttir	2008		Database# 771; dog based on elongated shape of V below semilunar notch; slightly larger than fox
2008-32-1343	NA			Brown, S.K. (VGL)	UC Davis	2014-12-06	No	Fail	Fail	NA	No	NA	NA	NA	Iceland	Reykjavík	Alþingisreitur, Reykjavík	2008-32	AD 1800 - 1950	Modern	Modern	Phase I; Peat Ash 77108; possible midden layer	C. l. familiaris	femur	complete		adult			Pálsdóttir, Albína H.	National Museum of Iceland	Vala Garðarsdóttir	2008		Database# 634; likely dates very close to AD 1800; 6 other bones from large dog from same context (one individual)
2008-32-1616	NA			Brown, S.K. (VGL)	UC Davis	2014-12-06	No	Fail	Fail	NA	No	NA	NA	NA	Iceland	Reykjavík	Alþingisreitur, Reykjavík	2008-32	AD 1500 - 1800	Historical	Historical	Phase II; Waste Deposit 81222	C. l. familiaris	tibia	complete		adult			Pálsdóttir, Albína H.	National Museum of Iceland	Vala Garðarsdóttir	2008		Database# 803; articulated with femur and fibula; dog based on size and shape of medial malleolus
2008-32-2327	NA			Brown, S.K. (VGL)	UC Davis	6/18/2014	No	Fail	Fail	NA	No	NA	NA	NA	Iceland	Reykjavík	Alþingisreitur, Reykjavík	2008-32	AD 1226 - 1500	Medieval	Other	Phase III; Waste Deposit 11073; Unit 11109	C. l. familiaris	femur	complete		adult			Pálsdóttir, Albína H.	National Museum of Iceland	Vala Garðarsdóttir	2008		Database# 853; from partially articulated skeleton; identified as dog base on sise and shape of heat/gr troc
2008-32-38	NA			Brown, S.K. (VGL)	UC Davis	6/18/2014	Yes	BACTERIA	Fail	NA	No	NA	NA	NA	Iceland	Reykjavík	Alþingisreitur, Reykjavík	2008-32	AD 1226 - 1500	Medieval	Other	Phase III; Waste Deposit 10532	C. l. familiaris	radius	complete		adult			Pálsdóttir, Albína H.	National Museum of Iceland	Vala Garðarsdóttir	2008		Database# 755; short and stocky, probably dog
2008-32-621	NA			Brown, S.K. (VGL)	UC Davis	6/18/2014	Yes	BACTERIA	Fail	NA	No	NA	NA	NA	Iceland	Reykjavík	Alþingisreitur, Reykjavík	2008-32	AD 1500 - 1800	Historical	Historical	Phase II; Waste Deposit 11337	C. l. familiaris	radius	complete		adult			Pálsdóttir, Albína H.	National Museum of Iceland	Vala Garðarsdóttir	2008		Database# 829; articulated with ulna (#830); "dwarf" variety of dog?
2008-32-670	NA			Brown, S.K. (VGL)	UC Davis	5/29/2014	No	Fail	Fail	NA	Yes	0.9	NA	NA	Iceland	Reykjavík	Alþingisreitur, Reykjavík	2008-32	AD 1226 - 1500	Medieval	Other	Phase III; Waste Deposit 28898; Unit 29552	C. l. familiaris	humerus	distal		adult			Pálsdóttir, Albína H.	National Museum of Iceland	Vala Garðarsdóttir	2008		Database# 739; identified as dog based on size
2008-32-843	NA			Brown, S.K. (VGL)	UC Davis	6/18/2014	No	Fail	Fail	NA	No	NA	NA	NA	Iceland	Reykjavík	Alþingisreitur, Reykjavík	2008-32	AD 870 - 1226	Norse/Viking	Norse	Phase IV; Waste Deposit 36143	C. l. familiaris	tibia	complete		adult			Pálsdóttir, Albína H.	National Museum of Iceland	Vala Garðarsdóttir	2008		Database# 775; identified as dog based on shape of medial malleolus, but size matches fox
2008-32-908	NA			Brown, S.K. (VGL)	UC Davis	6/18/2014	Yes	BACTERIA	Fail	NA	No	NA	NA	NA	Iceland	Reykjavík	Alþingisreitur, Reykjavík	2008-32	AD 1226 - 1500	Medieval	Other	Phase III; Peat Ash 43191; waste deposit from a large midden	C. l. familiaris	femur	complete		adult			Pálsdóttir, Albína H.	National Museum of Iceland	Vala Garðarsdóttir	2008		Database# 539; likely dates to AD 1500 or later; very large dog
2009-32-1539	NA			Brown, S.K. (VGL)	UC Davis	6/18/2014	No	Fail	Fail	NA	No	NA	NA	NA	Iceland	Reykjavík	Alþingisreitur, Reykjavík	2009-32	AD 1500 - 1800	Historical	Historical	Phase II; Waste Deposit 77539	C. l. familiaris	femur	complete		adult			Pálsdóttir, Albína H.	National Museum of Iceland	Vala Garðarsdóttir	2009		Database# 622; medium-sized dog
2009-32-1556	NA			Brown, S.K. (VGL)	UC Davis	6/18/2014	No	Fail	Fail	NA	No	NA	NA	NA	Iceland	Reykjavík	Alþingisreitur, Reykjavík	2009-32	AD 1226 - 1500	Medieval	Other	Phase III; Cultural Layer 84805; Unit 85381	C. l. familiaris	tibia	complete		adult			Pálsdóttir, Albína H.	National Museum of Iceland	Vala Garðarsdóttir	2009		Database# 972; part of nearly compete articulated skeleton (cranium: 2009-32-1708, #784)
2009-32-1629	NA			Brown, S.K. (VGL)	UC Davis	6/18/2014	Yes	Fail	Fail	NA	No	NA	NA	NA	Iceland	Reykjavík	Alþingisreitur, Reykjavík	2009-32	AD 1500 - 1800	Historical	Historical	Phase II; Waste Deposit 84601; Unit 84874	C. l. familiaris	humerus	complete		adult			Pálsdóttir, Albína H.	National Museum of Iceland	Vala Garðarsdóttir	2009		Database# 760; identified as dog based on size
2009-32-1637	NA			Brown, S.K. (VGL)	UC Davis	6/18/2014	Yes	BACTERIA	Fail	NA	No	NA	NA	NA	Iceland	Reykjavík	Alþingisreitur, Reykjavík	2009-32	AD 1500 - 1800	Historical	Historical	Phase II; Waste Deposit 81222	C. l. familiaris	metatarsal 4	complete		adult			Pálsdóttir, Albína H.	National Museum of Iceland	Vala Garðarsdóttir	2009		Database# 825; very large dog
2009-32-1760	NA			Brown, S.K. (VGL)	UC Davis	2014-04-06	No	Fail	Fail	NA	No	NA	NA	NA	Iceland	Reykjavík	Alþingisreitur, Reykjavík	2009-32	AD 1500 - 1800	Historical	Historical	Phase II; Katla 1500 tephra in situ 86092; located at the eastern side of Area C	C. l. familiaris	femur	complete		adult			Pálsdóttir, Albína H.	National Museum of Iceland	Vala Garðarsdóttir	2009		Database# 842; identified as dog based on size; articulates with pelvis and tib from same context
2009-32-1819	NA			Brown, S.K. (VGL)	UC Davis	2014-04-06	Yes	Fail	Fail	NA	No	NA	NA	NA	Iceland	Reykjavík	Alþingisreitur, Reykjavík	2009-32	AD 1500 - 1800	Historical	Historical	Phase II; Katla 1500 tephra in situ 86092; located at the eastern side of Area C	C. l. familiaris	tibia	complete		adult			Pálsdóttir, Albína H.	National Museum of Iceland	Vala Garðarsdóttir	2009		Database# 794; identified as dog based on size; nearly complete skeleton
2009-32-1838	NA			Brown, S.K. (VGL)	UC Davis	5/29/2014	No	Fail	Fail	NA	No	NA	NA	NA	Iceland	Reykjavík	Alþingisreitur, Reykjavík	2009-32	AD 1500 - 1800	Historical	Historical	Phase II; Cultural Layer 88516; Unit 100000	C. l. familiaris/ V. lagopus	femur	complete		juvenile			Pálsdóttir, Albína H.	National Museum of Iceland	Vala Garðarsdóttir	2009		Database# 931; unfused; 850 mm; size comparable to juvenile arctic fox (RM-12770 at NÍ)
2009-32-1936	NA			Brown, S.K. (VGL)	UC Davis	2014-04-06	No	Fail	Fail	NA	No	NA	NA	NA	Iceland	Reykjavík	Alþingisreitur, Reykjavík	2009-32	AD 1226 - 1500	Medieval	Other	Phase III; Cultural Layer 103198; Unit 103413	C. l. familiaris	femur	complete		adult			Pálsdóttir, Albína H.	National Museum of Iceland	Vala Garðarsdóttir	2009		Database# 791; from partially articulated skeleton; identified as dog based on size and shape of head/gr troc
2009-32-1948	NA			Brown, S.K. (VGL)	UC Davis	2014-04-06	No	Fail	Fail	NA	No	NA	NA	NA	Iceland	Reykjavík	Alþingisreitur, Reykjavík	2009-32	AD 1226 - 1500	Medieval	Other	Phase III; Cultural Layer 100330	C. l. familiaris/ V. lagopus	tibia	complete		adult			Pálsdóttir, Albína H.	National Museum of Iceland	Vala Garðarsdóttir	2009		Database# 888; from partially articulated skeleton; identified as dog based on shape of medial malleolus, but size matches fox
2009-32-2985	NA			Brown, S.K. (VGL)	UC Davis	5/29/2014	No	Fail	Fail	NA	Yes	0.4	NA	NA	Iceland	Reykjavík	Alþingisreitur, Reykjavík	2009-32	AD 1226 - 1500	Medieval	Other	Phase III; Cultural Layer 238523; peat, partially waterlogged; waste deposit	C. l. familiaris	mandible	complete (3 teeth)		adult			Pálsdóttir, Albína H.	National Museum of Iceland	Vala Garðarsdóttir	2009		Database# 1207; large-sized dog
2009-32-3111	NA			Brown, S.K. (VGL)	UC Davis	2014-04-06	No	Fail	Fail	NA	No	NA	NA	NA	Iceland	Reykjavík	Alþingisreitur, Reykjavík	2009-32	AD 870 - 1226	Norse/Viking	Norse	Phase IV; Cultural Layer 351281; Unit 351370	C. l. familiaris	atlas	complete		adult			Pálsdóttir, Albína H.	National Museum of Iceland	Vala Garðarsdóttir	2009		Database# 1088; identified as dog based on size
2009-32-3316	NA			Brown, S.K. (VGL)	UC Davis	5/29/2014	Yes	Dog	Fail	NA	Yes	5.7	A2a	NA	Iceland	Reykjavík	Alþingisreitur, Reykjavík	2009-32	AD1600-1800	Historical	Historical	Phase II; Peat Ash 35141; possible midden layer; Unit 359591	C. l. familiaris	cranium	complete (R: I2, I3, C, P1-M2; L: P1-M2)		old adult (heavy wear)			Pálsdóttir, Albína H.	National Museum of Iceland	Vala Garðarsdóttir	2009		Database# 1205; identified as dog based on size; low sagittal crest, wide skull, short snout
2012-32-4144	NA			Brown, S.K. (VGL)	UC Davis	5/29/2014	No	Fail	Fail	NA	No	NA	NA	NA	Iceland	Reykjavík	Alþingisreitur, Reykjavík	2012-32	AD 870 - 1226	Norse/Viking	Norse	Phase IV; Waste Deposit 4024541	C. l. familiaris	metacarpal 4	complete		adult			Pálsdóttir, Albína H.	National Museum of Iceland	Vala Garðarsdóttir	2012		Database# 1160; identified as dog based on size
21.KM90.2/11.938	NA			Brown, S.K. (VGL)	UC Davis	11/13/2012	No	Fail	Fail	NA	No	NA	NA	NA	Russia	Chukotka	Kaniskak-M, Chukotka	Kaniskak-M	BC 300 - AD 400		Siberian Holocene	Unit 2, Level 11	C. l. familiaris	cranium	maxillary fragment	R	adult			Vasyukov, Mitya	Russian Academy of Sciences		1990		FS# 938
22.KM90.2/12.908	NA			Brown, S.K. (VGL)	UC Davis	11/13/2012	Yes	Dog	A2a	NNNNNNNNNNNNNNNNNNNNNNNNNNNNNNNNNNNNNNNNNNNNNNNNNNNNNNNNNNNNNNNNNNNNNNNNNNNNNNNNNNNNNNNNNNNNNNNNNNNNNNCCCCNTATGTACGTCGTGCATTAATGGTTTGCCCCATGCATATAAGCATGTACATAATATTATATCCTTACATAGGANCATATTAACTCAATCTCATAGTTCACTGATCTACCAACAGTAATCGAATGCATATCACTTAGTCCAATAAGGGCTTAATCACCATGCCTCGAGAAACCATNNNCAACCCTTGCTCGTANATGTCCCTCTTCTCGCTCCGGGCCCATACTANACGTGGGGGTTACTATCATGAAACTATACCTGGCATCTGGNTTCTTACTTCAGGGCCANNNTNANACT…	No	NA	NA	NA	Russia	Chukotka	Kaniskak-M, Chukotka	Kaniskak-M	BC 300 - AD 400		Siberian Holocene	Unit 2, Level 12	C. l. familiaris	mandible	fragment + m2	L	adult			Vasyukov, Mitya	Russian Academy of Sciences		1990		FS# 908
23.KM90.2/12.907	NA			Brown, S.K. (VGL)	UC Davis	10/22/2012	Yes	Dog	A2b	NNNNNNNNNNNNNNNNNNNNNNNNNNNNNNNNNNNNNNNNNNNNNNNNNNNNNNNNNNNNNNNNNNNNNNNNNNNNNNNNNNNNNNNNNNNNNNNNNNNNNNCCCCNTATGTACGTCGTGCATTAATGGTTTGCCCCATGCATATAAGCATGTACATAATATTATATCCTTACATAGGANCATATTAACTCAATCTCATAGTTCACTGATCTATCAACAGTAATCGAATGCATATCACTTAGTCCAATAAGGGCTTAATCACCATGCCTCGAGAAACCATNNNCAACCCTTGCTCGTANATGTCCCTCTTCTCGCTCCGGGCCCATACTANACGTGGGGGTTACTATCATGAAACTATACCTGGCATCTGGNTTCTTACTTCAGGGCCANNNTNANACT…	Yes	0	NA	NA	Russia	Chukotka	Kaniskak-M, Chukotka	Kaniskak-M	BC 300 - AD 400		Siberian Holocene	Unit 2, Level 12	C. l. familiaris	mandible	fragment + p2, p4, m2	L	adult			Vasyukov, Mitya	Russian Academy of Sciences		1990		FS# 907
24.KM90.2/12.168	NA			Brown, S.K. (VGL)	UC Davis	10/22/2012	Yes	Dog	A2a	CCCTATGTACGTCGTGCATTAATGGTTTGCCCCATGCATATAAGCATGTACATAATATTATATCCTTACATAGGACATATTAACTCAATCTCATAGTTCACTGATCTACCAACAGTAATCGAATGCATATCACTTAGTCCAATAAGGGCTTAATCACCATGCCTCGAGAAACCATCAACCCTTGCTCGTAATGTCCCTCTTCTCGCTCCGGGCCCATACTAACGTGGGGGTTACTATCATGAAACTATACCTGGCATCTGGTTCTTACTTCAGGGCCATAACTTTATGTACTCCAATCCTACTAATTCTCGCAAATGGGACATCTCGATGGACTAATGACTAATCAGCCCATGATCACACA	Yes	1.1	NA	NA	Russia	Chukotka	Kaniskak-M, Chukotka	Kaniskak-M	BC 300 - AD 400		Siberian Holocene	Unit 2, Level 12	C. l. familiaris	mandible	fragment + c, p3-4	L	adult			Vasyukov, Mitya	Russian Academy of Sciences		1990		FS# 168
25.KM90.2/10.922	NA			Brown, S.K. (VGL)	UC Davis	11/26/2012	No	Fail	Fail	NA	No	NA	NA	NA	Russia	Chukotka	Kaniskak-M, Chukotka	Kaniskak-M	BC 300 - AD 400		Siberian Holocene	Unit 2, Level 10	C. l. familiaris	tibia	fragment	R	adult			Vasyukov, Mitya	Russian Academy of Sciences		1990		FS# 922
26.KM90.2/10.923	NA			Brown, S.K. (VGL)	UC Davis	2/13/2013	Yes	Dog	Indeterminate	NNNNNNNNNNNNNNNNNNNNNNNNNNNNNNNNNNNNNNNNNNNNNNNNNNNNNNNNNNNNNNNNNNNNNNNNNNNNNNNNNNNNNNNNNNNNNNNNNNNNNNNCCCNTATGTACGTCGTGCATTAATGGTTTGCCCCATGCATATAAGCATGTACATAATATTATATCCTTACATAGGANCATATTAACTCAATCTCATAGTTCACTGATCTATCAACAGTAATCGAATGCATATCACTTAGTCCAATAAGGGCTTAATCACCATGCCTCGAGAAACCATNNNCAACCCTTGCTCGTANATGTCCCTCTTCTCGCTCCGGGCCCATACTANACGTGGGGGTTACTATCATGAAACTATACCTGGCATCTGGNTTCTTACTTCAGGGCCANNNTNANACT…	Yes	2.1	NA	NA	Russia	Chukotka	Kaniskak-M, Chukotka	Kaniskak-M	BC 300 - AD 400		Siberian Holocene	Unit 2, Level 10	C. l. familiaris	tibia	fragment	R	adult			Vasyukov, Mitya	Russian Academy of Sciences		1990		FS# 923
27.KM90.2/9.931	NA			Brown, S.K. (VGL)	UC Davis	2/13/2013	Yes	Dog	A22	NNNNNNNNNNNNNNNNNNNNNNNNNNNNNNNNNNNNNNNNNNNNNNNNNNNNNNNNNNNNNNNNNNNNNNNNNNNNNNNNNNNNNNNNNNNNNNNNNNNNNNCCCCNTATGTACGTCGTGCATTAATGGTTTGCCCTATGTATATAAGCATGTACATAATATTATATCCTTACATAGGANCATATTAACTCAATCTCATAGTTCATTGATCTACCAACAGTAATCGAATGCATATCACTTAGTCCAATAAGGGCTTAATCACCATGCCTCGAGAAACCATNNNCAACCCTTGCTCGTANATGTCCCTCTTCTCGCTCCGGGCCCATACTANACGTGGGGGTTACTATCATGAAACTATACCTGGCATCTGGNTTCTTACTTCAGGGCCANNNTNANACT…	Yes	0.9	NA	NA	Russia	Chukotka	Kaniskak-M, Chukotka	Kaniskak-M	BC 300 - AD 400		Siberian Holocene	Unit 2, Level 9	C. l. familiaris	ulna	fragment	L	adult			Vasyukov, Mitya	Russian Academy of Sciences		1990		FS# 931
28.KM90.2/8.933	NA			Brown, S.K. (VGL)	UC Davis	2/13/2013	Yes	Dog	A1b	NNNNNNNNNNNNNNNNNNNNNNNNNNNNNNNNNNNNNNNNNNNNNNNNNNNNNNNNNNNNNNNNNNNNNNNNNNNNNNNNNNNNNNNNNNNNNNNNNNNNNNNNNNNNNNNNNNNNNNNNNNNNNNNNNNNNNNNNNNNNNNNNNNNNNNNNNNNNNNNNNNNNNNNNNNNNNNNNNNNNNNNNNNNNNNNNNNNNNNNNNNNNNNNNNNNNNNNNNNNNNNNNNNNNNNNNNNNNNNNNNNNNNNNNNNNNNCTTAATCACCATGCCTCGAGAAACCATNNNCAACCCTTGCTCGTANATGTCCCTCTTCTCGCTCCGGGCCCATACTANACGTGGGGGTTACTATCATGAAACTATACCTGGCATCTGGNTTCTTACTTCAGGGCCANNNTNANACT…	No	NA	NA	NA	Russia	Chukotka	Kaniskak-M, Chukotka	Kaniskak-M	BC 300 - AD 400		Siberian Holocene	Unit 2, Level 8	C. l. familiaris	mandible	fragment	L	adult			Vasyukov, Mitya	Russian Academy of Sciences		1990		FS# 933
29.KM90.2/7.1578	NA			Brown, S.K. (VGL)	UC Davis	10/22/2012	No	Fail	Fail	NA	No	NA	NA	NA	Russia	Chukotka	Kaniskak-M, Chukotka	Kaniskak-M	BC 300 - AD 400		Siberian Holocene	Unit 2, Level 7	C. l. familiaris	mandible	fragment + p2-3	R	adult			Vasyukov, Mitya	Russian Academy of Sciences		1990		FS# 1578
30.KM90.2/2.626	NA			Brown, S.K. (VGL)	UC Davis	10/8/2012	Yes	Dog	A2b	CTGAGATTCTTCTTAAACTATTCCCTGACACCCCTACATTCATATATTGAATCACCCCTACTGTGCTATGTCAGTATCNNNNNGTAAACCCTTCTCCCCTCCCCTATGTACGTCGTGCATTAATGGTTTGCCCCATGCATATAAGCATGTACATAATATTATATCCTTACATAGGACATATTAACTCAATCTCATAGTTCACTGATCTACCAACAGTAATCGAATGCATATCACTTAGTCCAATAAGGGCTTAATCACCATGCCTCGAGAAACCATCAACCCTTGCTCGTAATGTCCCTCTTCTCGCTCCGGGCCCATACTAACGTGGGGGTTACTATCATGAAACTATACCTGGCATCTGGTTCTTACTTCAGGGCCATAACTTTATTTACTCCAATC…	Yes	4	A2b	NA	Russia	Chukotka	Kaniskak-M, Chukotka	Kaniskak-M	AD 1200 - 1600	Thule	Inuit	Unit 2, Level 2	C. l. familiaris	mandible	fragment	L	adult			Vasyukov, Mitya	Russian Academy of Sciences		1990		FS# 626
31.KM90.2/2.307	NA			Brown, S.K. (VGL)	UC Davis	2/13/2013	Yes	Dog	A2b	CTGAGATTCTTCTTAAACTATTCCCTGACACCCCTACATTCATATATTGAATCACCCCTACTGTGCTATGTCAGTATCTCCAGGTAAACCCTTCTCCCCTCCCCTATGTACGTCGTGCATTAATGGTTTGCCCCATGCATATAAGCATGTACATAATATTATATCCTTACATAGGACATATTAACTCAATCTCATAGTTCACTGATCTATCAACAGTAATCGAATGCATATCACTTAGTCCAATAAGGGCTTAATCACCATGCCTCGAGAAACCATCAACCCTTGCTCGTAATGTCCCTCTTCTCGCTCCGGGCCCATACTAACGTGGGGGTTACTATCATGAAACTATACCTGGCATCTGGTTCTTACTTCAGGGCCATAACTTTATTTACTCCAATC…	Yes	19.3	A2b	NA	Russia	Chukotka	Kaniskak-M, Chukotka	Kaniskak-M	AD 1200 - 1600	Thule	Inuit	Unit 2, Level 2	C. l. familiaris	mandible	fragment	R	adult			Vasyukov, Mitya	Russian Academy of Sciences		1990		FS# 307
31588_a	31588_a			Sinding, M-H.S.	Copenhagen		No	Dog	NA	NA	Yes	0	NA	NA	Greenland	North Greenland	Kap York		1905	Historical	Historical			Clothing - Man's parka
31588_b	31588_b			Sinding, M-H.S.	Copenhagen		No	Dog	NA	NA	Yes	0	NA	NA	Greenland	North Greenland	Kap York		1905	Historical	Historical			Clothing - Man's parka
32.KM90.2/4.266	NA			Brown, S.K. (VGL)	UC Davis	11/26/2012	No	Fail	Fail	NA	No	NA	NA	NA	Russia	Chukotka	Kaniskak-M, Chukotka	Kaniskak-M	AD 700 - 1200	Birnirk	Inuit	Unit 2, Level 4	C. l. familiaris	cranium	maxillary fragment	R	adult			Vasyukov, Mitya	Russian Academy of Sciences		1990		FS# 266
33.KM90.1/4.532	NA			Brown, S.K. (VGL)	UC Davis	10/22/2012	No	Fail	Fail	NA	No	NA	NA	NA	Russia	Chukotka	Kaniskak-M, Chukotka	Kaniskak-M	AD 700 - 1200	Birnirk	Inuit	Unit 1, Level 4	C. l. familiaris	cranium	maxillary fragment	R	adult			Vasyukov, Mitya	Russian Academy of Sciences		1990		FS# 532
34.KM89.1/3.247	NA			Brown, S.K. (VGL)	UC Davis	10/22/2012	Yes	Dog	Fail	NA	Yes	2.6	NA	NA	Russia	Chukotka	Kaniskak-M, Chukotka	Kaniskak-M	AD 700 - 1200	Birnirk	Inuit	Unit 1, Level 3	C. l. familiaris	cranium	maxillary fragment	R	adult			Vasyukov, Mitya	Russian Academy of Sciences		1989		FS# 247
35.KM90.2/5.873	NA			Brown, S.K. (VGL)	UC Davis	11/26/2012	Yes	Dog	A1b	GCTGAAATTCTTCTTAAACTATTCCCTGACACCCCTACATTCATATATTGAATCACCCCTACTGTGCTATGTCAGTATCTCCAGGTAAACCCTTCTCNCCCTCNNNNNNNNNNNNNNNNNNNNNNNNNNNNNNNNNNNNNNNNNNNNNNNNNNNNNNNNNNNNNNNNNNNNNNNNNNNNNNNNNNNNNNNNNNNNNNNNNNNNNNNNNNNNNNNNAGCAGTAATCAAATGCATATCACTTAGTCCAATAAGGGCTTAATCACCATGCCTCGAGAAACCATNNNCAACCCTTGCTCGTANATGTCCCTCTTCTCGCTCCGGGCCCATACTANACGTGGGGGTTACTATCATGAAACTATACCTGGCATCTGGNTTCTTACTTCAGGGCCANNNTNANACC…	Yes	3.8	A1b	NA	Russia	Chukotka	Kaniskak-M, Chukotka	Kaniskak-M	AD 400 - 700		Siberian Holocene	Unit 2, Level 5	C. l. familiaris	atlas	fragment	n/a	adult			Vasyukov, Mitya	Russian Academy of Sciences		1990		FS# 873
36.KM90.2/5.272	NA			Brown, S.K. (VGL)	UC Davis	10/22/2012	No	Fail	Fail	NA	No	NA	NA	NA	Russia	Chukotka	Kaniskak-M, Chukotka	Kaniskak-M	AD 400 - 700		Siberian Holocene	Unit 2, Level 5	C. l. familiaris	atlas	fragment	n/a	adult			Vasyukov, Mitya	Russian Academy of Sciences		1990		FS# 272
37.KM89.1/6.1566	NA			Brown, S.K. (VGL)	UC Davis	10/22/2012	No	Fail	Fail	NA	No	NA	NA	NA	Russia	Chukotka	Kaniskak-M, Chukotka	Kaniskak-M	AD 400 - 700		Siberian Holocene	Unit 1, Level 6	C. l. familiaris	cranium	maxillary fragment	L	adult			Vasyukov, Mitya	Russian Academy of Sciences		1989		FS# 1566
49-CRG-188	NA			Brown, S.K. (VGL)	UC Davis	1/23/2013	No	Fail	Fail	NA	No	NA	NA	NA	Alaska		Cape Addington Rockshelter	49-CRG-188	AD 450 - 920		Siberian Holocene	Trench 1, Unit 2, Level III-6	C. l. familiaris							Moss, Madonna	US Forest Service			Crockford, Moss & Baichtal 2011
49-PET-067	NA			Brown, S.K. (VGL)	UC Davis	1/23/2013	No	Fail	Fail	NA	No	NA	NA	NA	Alaska		Coffman Cove	49-PET-067	BC 1850 - 1350		Siberian Holocene	Lot 37; N201, E281; Level 4A	C. l. familiaris							Moss, Madonna	US Forest Service			Crockford, Moss & Baichtal 2011
49-PET-556	NA			Brown, S.K. (VGL)	UC Davis	1/23/2013	No	Fail	Fail	NA	No	NA	NA	NA	Alaska		Coffman Cove Ferry Terminal	49-PET-556	BC 380 - 190		Siberian Holocene	Lot 27; N302, E317, NW; Level 2A	C. l. familiaris							Moss, Madonna	US Forest Service			Crockford, Moss & Baichtal 2011
560028-01	NA			Brown, S.K. (VGL)	UC Davis	7/23/2012	Yes	Dog	A1b	CCCCTATGTACGTCGTGCATTAATGGTTTGCCCCATGCATATAAGCATGTACATAATATTATATCCTTACATAGGACATATTAACTCAATCTCATAGTTCACTGATCTATCAACAGTAATCAAATGCATATCACTTAGTCCAATAAGGGCTTAATCACCATGCCTCGAGAAACCATCAACCCTTGCTCGTAATGTCCCTCTTCTCGCTCCGGGCCCATACTAACGTGGGGGTTACTATCATGAAACTATACCTGGCATCTGGTTCTTACTTCAGGGCCATAACTTTATTTACTCCAATCCTACTAATTCTCGCAAATGGGACATCTCGATGGACTAATGACTAATCAGCCCATGAT	Yes	0	NA	NA	Alaska	Kodiak Island	Uyak, Kodiak Island	49-KOD-145	AD 570 - 1470	Katchemak/Koniag	Paleo-Inuit	Upper Level (Black)	C. l. familiaris	mandible		L				West, Catherine F.	Smithsonian NMNH	Hrdlicka, Ales	1933-36	Allen 1939; West & Jarvis 2015
560028-02	NA			Brown, S.K. (VGL)	UC Davis	7/16/2012	No	Fail	Fail	NA	No	NA	NA	NA	Alaska	Kodiak Island	Uyak, Kodiak Island	49-KOD-145	AD 570 - 1470	Katchemak/Koniag	Paleo-Inuit	Upper Level (Black)	C. l. familiaris	mandible		L				West, Catherine F.	Smithsonian NMNH	Hrdlicka, Ales	1933-36	Allen 1939; West & Jarvis 2015
560028-03	NA			Brown, S.K. (VGL)	UC Davis	7/16/2012	Yes	Dog	Fail	NA	Yes	2.3	NA	NA	Alaska	Kodiak Island	Uyak, Kodiak Island	49-KOD-145	AD 570 - 1470	Katchemak/Koniag	Paleo-Inuit	Upper Level (Black)	C. l. familiaris	mandible		L				West, Catherine F.	Smithsonian NMNH	Hrdlicka, Ales	1933-36	Allen 1939; West & Jarvis 2015
560028-04	NA			Brown, S.K. (VGL)	UC Davis	7/16/2012	Yes	Fail	Fail	NA	No	NA	NA	NA	Alaska	Kodiak Island	Uyak, Kodiak Island	49-KOD-145	AD 570 - 1470	Katchemak/Koniag	Paleo-Inuit	Upper Level (Black)	C. l. familiaris	mandible		L				West, Catherine F.	Smithsonian NMNH	Hrdlicka, Ales	1933-36	Allen 1939; West & Jarvis 2015
560028-05	NA			Brown, S.K. (VGL)	UC Davis	7/23/2012	Yes	Dog	A1b	CCCCTATGTACGTCGTGCATTAATGGTTTGCCCCATGCATATAAGCATGTACATAATATTATATCCTTACATAGGACATATTAACTCAATCTCATAGTTCACTGATCTATCAACAGTAATCAAATGCATATCACTTAGTCCAATAAGGGCTTAATCACCATGCCTCGAGAAACCATCAACCCTTGCTCGTAATGTCCCTCTTCTCGCTCCGGGCCCATACTAACGTGGGGGTTACTATCATGAAACTATACCTGGCATCTGGTTCTTACTTCAGGGCCATAACTTTATTTACTCCAATCCTACTAATTCTCGCAAATGGGACATCTCGATGGACTAATGACTAATCAGCCCATGAT	Yes	2	NA	NA	Alaska	Kodiak Island	Uyak, Kodiak Island	49-KOD-145	AD 570 - 1470	Katchemak/Koniag	Paleo-Inuit	Upper Level (Black)	C. l. familiaris	mandible		L				West, Catherine F.	Smithsonian NMNH	Hrdlicka, Ales	1933-36	Allen 1939; West & Jarvis 2015
560028-06	NA			Brown, S.K. (VGL)	UC Davis	7/3/2012	Yes	Dog	A1b	CCCCTATGTACGTCGTGCATTAATGGTTTGCCCCATGCATATAAGCATGTACATAATATTATATCCTTACATAGGACATATTAACTCAATCTCATAGTTCACTGATCTATCAACAGTAATCAAATGCATATCACTTAGTCCAATAAGGGCTTAATCACCATGCCTCGAGAAACCATCAACCCTTGCTCGTAATGTCCCTCTTCTCGCTCCGGGCCCATACTAACGTGGGGGTTACTATCATGAAACTATACCTGGCATCTGGTTCTTACTTCAGGGCCATAACTTTATTTACTCCAATCCTACTAATTCTCGCAAATGGGACATCTCGATGGACTAATGACTAATCAGCCCATGAT	Yes	4.5	NA	NA	Alaska	Kodiak Island	Uyak, Kodiak Island	49-KOD-145	AD 570 - 1470	Katchemak/Koniag	Paleo-Inuit	Upper Level (Black)	C. l. familiaris	mandible		L				West, Catherine F.	Smithsonian NMNH	Hrdlicka, Ales	1933-36	Allen 1939; West & Jarvis 2015
560028-07	NA			Brown, S.K. (VGL)	UC Davis	7/3/2012	No	Fail	Fail	NA	No	NA	NA	NA	Alaska	Kodiak Island	Uyak, Kodiak Island	49-KOD-145	BC 40 - AD 320	Katchemak	Paleo-Inuit	Lower Level (Blue)	C. l. familiaris	mandible		L				West, Catherine F.	Smithsonian NMNH	Hrdlicka, Ales	1933-36	Allen 1939; West & Jarvis 2015
560028-08	NA			Brown, S.K. (VGL)	UC Davis	7/23/2012	No	Fail	Fail	NA	No	NA	NA	NA	Alaska	Kodiak Island	Uyak, Kodiak Island	49-KOD-145	BC 140 - AD 160	Katchemak	Paleo-Inuit	Middle Level (Red)	C. l. familiaris	mandible		L				West, Catherine F.	Smithsonian NMNH	Hrdlicka, Ales	1933-36	Allen 1939; West & Jarvis 2015
560028-09	NA			Brown, S.K. (VGL)	UC Davis	7/23/2012	No	Fail	Fail	NA	No	NA	NA	NA	Alaska	Kodiak Island	Uyak, Kodiak Island	49-KOD-145	BC 140 - AD 650	Katchemak	Paleo-Inuit	Middle Level (Red)	C. l. familiaris	mandible		L				West, Catherine F.	Smithsonian NMNH	Hrdlicka, Ales	1933-36	Allen 1939; West & Jarvis 2015
560028-10	NA			Brown, S.K. (VGL)	UC Davis	7/23/2012	No	Fail	Fail	NA	No	NA	NA	NA	Alaska	Kodiak Island	Uyak, Kodiak Island	49-KOD-145	BC 140 - AD 650	Katchemak	Paleo-Inuit	Middle Level (Red)	C. l. familiaris	mandible		L				West, Catherine F.	Smithsonian NMNH	Hrdlicka, Ales	1933-36	Allen 1939; West & Jarvis 2015
560028-11	NA			Brown, S.K. (VGL)	UC Davis	7/23/2012	Yes	Dog	A1b	CCCCTATGTACGTCGTGCATTAATGGTTTGCCCCATGCATATAAGCATGTACATAATATTATATCCTTACATAGGACATATTAACTCAATCTCATAGTTCACTGATCTATCAACAGTAATCAAATGCATATCACTTAGTCCAATAAGGGCTTAATCACCATGCCTCGAGAAACCATCAACCCTTGCTCGTAATGTCCCTCTTCTCGCTCCGGGCCCATACTAACGTGGGGGTTACTATCATGAAACTATACCTGGCATCTGGTTCTTACTTCAGGGCCATAACTTTATTTACTCCAATCCTACTAATTCTCGCAAATGGGACATCTCGATGGACTAATGACTAATCAGCCCATGAT	No	NA	NA	NA	Alaska	Kodiak Island	Uyak, Kodiak Island	49-KOD-145	BC 140 - AD 1470	Katchemak/Koniag	Paleo-Inuit	unknown	C. l. familiaris	mandible		L				West, Catherine F.	Smithsonian NMNH	Hrdlicka, Ales	1933-36	Allen 1939; West & Jarvis 2015
560028-12	NA			Brown, S.K. (VGL)	UC Davis	7/23/2012	Yes	Dog	A1b	NNNNNNNNNNNNNNNNNNNNNNNNNNNNNNNNNNNNNNNNNNNNNNNNNNNNNNNNNNNNNNNNNNNNNNNNNNNNNNNNNNNNNNNNNNNNNNNNNNNNNTCCCCNTATGTACGTCGTGCATTAATGGTTTGCCCCATGCATATAAGCATGTACATAATATTATATCCTTACATAGGANCATATTAACTCAATCTCATAGTTCATTGATCTATCAACAGTAATCGAATGCATATCACTTAGTCCAATAAGGGCTTAATCACCATGCCTCGANNNNNNNNNNNNNNNNNNNNNNNNNNNNNNNNNNNNNNNNNNNNNNNNNNNNNNNNNNNNNNNNNNNNNNNNNNNNNNNNNNNNNNNNNNNNNNNNNNNNNNNNNNNNNNNNNNNNNNNNNNNNNNN…	Yes	1.7	NA	NA	Alaska	Kodiak Island	Uyak, Kodiak Island	49-KOD-145	BC 140 - AD 650	Katchemak	Paleo-Inuit	Middle Level (Red)	C. l. familiaris	mandible		L				West, Catherine F.	Smithsonian NMNH	Hrdlicka, Ales	1933-36	Allen 1939; West & Jarvis 2015
560028-13	NA			Brown, S.K. (VGL)	UC Davis	7/3/2012	No	Fail	Fail	NA	No	NA	NA	NA	Alaska	Kodiak Island	Uyak, Kodiak Island	49-KOD-145	BC 140 - AD 650	Katchemak	Paleo-Inuit	Middle Level (Red)	C. l. familiaris	mandible		L				West, Catherine F.	Smithsonian NMNH	Hrdlicka, Ales	1933-36	Allen 1939; West & Jarvis 2015
560028-14	NA			Brown, S.K. (VGL)	UC Davis	7/3/2012	Yes	Dog	A22	TCCCCTATGTACGTCGTGCATTAATGGTTTGCCCCATGCATATAAGCATGTACATAATATTATATCCTTACATAGGACATATTAACTCAATCTCATAGTTCATTGATCTATCAACAGTAATCGAATGCATATCACTTAGTCCAATAAGGGCTTAATCACCATGCCTCGAGAAACCATCAACCCTTGCTCGTAATGTCCCTCTTCTCGCTCCGGGCCCATACTAACGTGGGGGTTACTATCATGAAACTATACCTGGCATCTGGTTCTTACTTCAGGGCCATAACTTTATTTACTCCAATCCTACTAATTCTCGCAAATGGGACATCTCGATNGACTAATGACTAATCAGCCCATGATCACACAT	Yes	1.5	NA	NA	Alaska	Kodiak Island	Uyak, Kodiak Island	49-KOD-145	BC 40 - AD 320	Katchemak	Paleo-Inuit	Lower Level (Blue)	C. l. familiaris	mandible		L				West, Catherine F.	Smithsonian NMNH	Hrdlicka, Ales	1933-36	Allen 1939; West & Jarvis 2015
560028-15	NA			Brown, S.K. (VGL)	UC Davis	7/23/2012	Yes	Dog	Fail	NA	Yes	2.5	NA	NA	Alaska	Kodiak Island	Uyak, Kodiak Island	49-KOD-145	BC 20 - AD 320	Katchemak	Paleo-Inuit	Lower Level (Blue)	C. l. familiaris	mandible		L				West, Catherine F.	Smithsonian NMNH	Hrdlicka, Ales	1933-36	Allen 1939; West & Jarvis 2015
560028-16	NA			Brown, S.K. (VGL)	UC Davis	7/23/2012	No	Fail	Fail	NA	No	NA	NA	NA	Alaska	Kodiak Island	Uyak, Kodiak Island	49-KOD-145	BC 40 - AD 320	Katchemak	Paleo-Inuit	Lower Level (Blue)	C. l. familiaris	mandible		L				West, Catherine F.	Smithsonian NMNH	Hrdlicka, Ales	1933-36	Allen 1939; West & Jarvis 2015
560028-17	NA			Brown, S.K. (VGL)	UC Davis	7/23/2012	No	Fail	Fail	NA	No	NA	NA	NA	Alaska	Kodiak Island	Uyak, Kodiak Island	49-KOD-145	BC 40 - AD 320	Katchemak	Paleo-Inuit	Lower Level (Blue)	C. l. familiaris	mandible		L				West, Catherine F.	Smithsonian NMNH	Hrdlicka, Ales	1933-36	Allen 1939; West & Jarvis 2015
560028-18	NA			Brown, S.K. (VGL)	UC Davis	7/23/2012	No	Fail	Fail	NA	No	NA	NA	NA	Alaska	Kodiak Island	Uyak, Kodiak Island	49-KOD-145	BC 40 - AD 320	Katchemak	Paleo-Inuit	Lower Level (Blue)	C. l. familiaris	mandible		L				West, Catherine F.	Smithsonian NMNH	Hrdlicka, Ales	1933-36	Allen 1939; West & Jarvis 2015
560028-19	NA			Brown, S.K. (VGL)	UC Davis	7/3/2012	Yes	Dog	A1b	GCTGAGATTCTTCTTAAACTATTCCCTGACACCCCTACATTCATATATTGAATCACCCCTACTGTGCTATGTCAGTATCTCCAGGTAAACCCTNNNCNCCCTCCCCNTATGTACGTCGTGCATTAATGGTTTGCCCCATGCATATAAGCATGTACATAATATTATATCCTTACATAGGANCATATTAACTCAATCTCATAGTTCACTGATCTATCAACAGTAATCAAATGCATATCACTTAGTCCAATAAGGGCTTAATCACCATGCCTCGAGAAACCATNNNCAACCCTTGCTCGTANATGTCCCTCTTCTCGCTCCGGGCCCATACTANACGTGGGGGTTACTATCATGAAACTATACCTGGCATCTGGNTTCTTACTTCAGGGCCANNNTNANACT…	Yes	4.8	A1b	NA	Alaska	Kodiak Island	Uyak, Kodiak Island	49-KOD-145	BC 140 - AD 650	Katchemak	Paleo-Inuit	Middle Level (Red)	C. l. familiaris	mandible		L				West, Catherine F.	Smithsonian NMNH	Hrdlicka, Ales	1933-36	Allen 1939; West & Jarvis 2015
560028-20	NA			Brown, S.K. (VGL)	UC Davis	7/23/2012	Yes	Dog	A2b	CTATCAACAGTAATCGAATGCATATCACTTAGTCCAATAAGGGCTTAATCACCATGCCTCGAGAAACCATCAACCCTTGCTCGTAATGTCCCTCTTCTCGCTCCGGGCCCATACTAACGTGGGGGTTACTATCATGAAACTATACCTGGCATCTGGTTCTTACTTCAGGGCCATAACTTTATTTACTCCAATCCTACTAATTCTCGCAAATGGGACATCTCGATGGACTAATGACTAATCAGCCCATGATCACACA	Yes	2.6	NA	NA	Alaska	Kodiak Island	Uyak, Kodiak Island	49-KOD-145	BC 140 - AD 650	Katchemak	Paleo-Inuit	Middle Level (Red)	C. l. familiaris	mandible		L				West, Catherine F.	Smithsonian NMNH	Hrdlicka, Ales	1933-36	Allen 1939; West & Jarvis 2015
560028-21	NA			Brown, S.K. (VGL)	UC Davis	7/16/2012	Yes	Dog	A2b	CTGAGATTCTTCTTAAACTATTCCCTGACACCCCTACATTCATATATTGAATCACCCCTACTGTGCTATGTCAGTATCTCCAGGTAAACCCTTCTCCCCTCCCCTATGTACGTCGTGCATTAATGGTTTGCCCCATGCATATAAGCATGTACATAATATTATATCCTTACATAGGACATATTAACTCAATCTCATAGTTCACTGATCTATCAACAGTAATCGAATGCATATCACTTAGTCCAATAAGGGCTTAATCACCATGCCTCGAGAAACCATCAACCCTTGCTCGTAATGTCCCTCTTCTCGCTCCGGGCCCATACTAACGTGGGGGTTACTATCATGAAACTATACCTGGCATCTGGTTCTTACTTCAGGGCCATAACTTTATTTACTCCAATC…	Yes	10.3	A2b	NA	Alaska	Kodiak Island	Uyak, Kodiak Island	49-KOD-145	BC 140 - AD 650	Katchemak	Paleo-Inuit	Middle Level (Red)	C. l. familiaris	mandible		L				West, Catherine F.	Smithsonian NMNH	Hrdlicka, Ales	1933-36	Allen 1939; West & Jarvis 2015
560028-22	NA			Brown, S.K. (VGL)	UC Davis	7/3/2012	No	Fail	Fail	NA	No	NA	NA	NA	Alaska	Kodiak Island	Uyak, Kodiak Island	49-KOD-145	BC 140 - AD 1470	Katchemak/Koniag	Paleo-Inuit	unknown	C. l. familiaris	mandible		L				West, Catherine F.	Smithsonian NMNH	Hrdlicka, Ales	1933-36	Allen 1939; West & Jarvis 2015
560028-23	NA			Brown, S.K. (VGL)	UC Davis	7/16/2012	Yes	Dog	Indeterminate	NNNNNNNNNNNNNNNNNNNNNNNNNNNNNNNNNNNNNNNNNNNNNNNNNNNNNNNNNNNNNNNNNNNNNNNNNNNNNNNNNNNNNNNNNNNNNNNNNNNNNNNNNNNNNNNNNNNNNNNNNNNNNNNNNNNNNNNNNNNNNNNNNNNNNNNNNNNNNNNNNNNNNNNNNNNNNNNNNNNNNNNNNNNNNNNNNNNNNNNNNNNNNNNNNNNNNNNNNNNNNNNNNNNNNNNNNNNNNNNNNNNNNNNNNNNNTCTTAATCACCATGCCTCGAGAAACCATNNNCAACCCTTGCTCGCANATATCCCTCTTCTCGCTCCGGGCCCATACTANACGTGGGAATTACTATCATGAAACTATACCTGGCATCTGGNTTCTTACTTCAGGGCCANNNTNANACT…	No	NA	NA	NA	Alaska	Kodiak Island	Uyak, Kodiak Island	49-KOD-145	BC 40 - AD 320	Katchemak	Paleo-Inuit	Lower Level (Blue)	C. l. familiaris	mandible		L				West, Catherine F.	Smithsonian NMNH	Hrdlicka, Ales	1933-36	Allen 1939; West & Jarvis 2015
560028-24	NA			Brown, S.K. (VGL)	UC Davis	7/16/2012	No	Fail	Fail	NA	No	NA	NA	NA	Alaska	Kodiak Island	Uyak, Kodiak Island	49-KOD-145	BC 40 - AD 260	Katchemak	Paleo-Inuit	Lower Level (Blue)	C. l. familiaris	mandible		L				West, Catherine F.	Smithsonian NMNH	Hrdlicka, Ales	1933-36	Allen 1939; West & Jarvis 2015
560028-25	NA			Brown, S.K. (VGL)	UC Davis	7/3/2012	No	Fail	Fail	NA	No	NA	NA	NA	Alaska	Kodiak Island	Uyak, Kodiak Island	49-KOD-145	BC 40 - AD 320	Katchemak	Paleo-Inuit	Lower Level (Blue)	C. l. familiaris	mandible		L				West, Catherine F.	Smithsonian NMNH	Hrdlicka, Ales	1933-36	Allen 1939; West & Jarvis 2015
560028-26	NA			Brown, S.K. (VGL)	UC Davis	7/3/2012	No	Fail	Fail	NA	No	NA	NA	NA	Alaska	Kodiak Island	Uyak, Kodiak Island	49-KOD-145	BC 40 - AD 320	Katchemak	Paleo-Inuit	Lower Level (Blue)	C. l. familiaris	mandible		L				West, Catherine F.	Smithsonian NMNH	Hrdlicka, Ales	1933-36	Allen 1939; West & Jarvis 2015
560028-27	NA			Brown, S.K. (VGL)	UC Davis	7/16/2012	No	Fail	Fail	NA	No	NA	NA	NA	Alaska	Kodiak Island	Uyak, Kodiak Island	49-KOD-145	AD 1310 - 1470	Koniag	Paleo-Inuit	Upper Level (Black)	C. l. familiaris	mandible		L				West, Catherine F.	Smithsonian NMNH	Hrdlicka, Ales	1933-36	Allen 1939; West & Jarvis 2015
560028-28	NA			Brown, S.K. (VGL)	UC Davis	7/16/2012	Yes	Dog	A2b	CCCCTATGTACGTCGTGCATTAATGGTTTGCCCCATGCATATAAGCATGTACATAATATTATATCCTTACATAGGACATATTAACTCAATCTCATAGTTCACTGATCTATCAACAGTAATCAAATGCATATCACTTAGTCCAATAAGGGCTTAATCACCATGCCTCGAGAAACCATCAACCCTTGCTCGTAATGTCCCTCTTCTCGCTCCGGGCCCATACTAACGTGGGGGTTACTATCATGAAACTATACCTGGCATCTGGTTCTTACTTCAGGGCCATAACTTTATTTACTCCAATCCTACTAATTCTCGCAAATGGGACATCTCGATGGACTAATGACTAATCAGCCCATGAT	Yes	5.8	A2b	NA	Alaska	Kodiak Island	Uyak, Kodiak Island	49-KOD-145	AD 570 - 1470	Katchemak/Koniag	Paleo-Inuit	Upper Level (Black)	C. l. familiaris	mandible		L				West, Catherine F.	Smithsonian NMNH	Hrdlicka, Ales	1933-36	Allen 1939; West & Jarvis 2015
560028-29	NA			Brown, S.K. (VGL)	UC Davis	7/3/2012	Yes	Dog	A2b	GCTGAGATTCTTCTTAAACTATTCCCTGACACCCCTACATTCATATATTGAATCACCCCTACTGTGCTATGTCAGTATCTCCAGGTAAACCCTTCTCNCCCTCCCCNTATGTACGTCGTGCATTAATGGTTTGCCCCATGCATATNNNNNNNNNNNNNNNNNNNNNNNNNNNNNNNNNANCATATTAACTCAATCTCATAGTTCACTGATCTATCAACAGTAAYCRAATGCATATCACTTAGTCCAATAAGGGCTTAATCACCATGCCTCGAGAAACCATNNNCAACCCTTGCTCGTANATGTCCCTCTTCTCGCTCCGGGCCCATACTANACGTGGGGGTTACTATCATGAAACTATACCTGGCATCTGGNTTCTTACTTCAGGGCCANNNTNANACT…	Yes	7.8	A2b	NA	Alaska	Kodiak Island	Uyak, Kodiak Island	49-KOD-145	AD 570 - 870	Katchemak	Paleo-Inuit	Upper Level (Black)	C. l. familiaris	mandible		L				West, Catherine F.	Smithsonian NMNH	Hrdlicka, Ales	1933-36	Allen 1939; West & Jarvis 2015
560028-30	NA			Brown, S.K. (VGL)	UC Davis	7/16/2012	No	Fail	Fail	NA	No	NA	NA	NA	Alaska	Kodiak Island	Uyak, Kodiak Island	49-KOD-145	AD 370 - 650	Katchemak	Paleo-Inuit	Middle Level (Red)	C. l. familiaris	mandible		L				West, Catherine F.	Smithsonian NMNH	Hrdlicka, Ales	1933-36	Allen 1939; West & Jarvis 2015
ADM.R.11737	NA			Brown, S.K. (VGL)	UC Davis	6/25/2012	No	Fail	Fail	NA	No	NA	NA	NA	Alaska	North Slope	Piġniq (Birnirk), North Slope	49-BAR-001	AD 600 - 1300	Birnirk	Inuit	Unit S1, W2; 3.0-3.5' BS	Canis sp.	cranium	premaxilla, nasal, partial frontal	n/a	adult			Brown, S.K./ Fawn Carter	UA Museum of the North	Carter, Wilbert	8/23/1953		sampled for radiocarbon dating (UAMN)
AL2089	SNRM_586546				Oxford		Yes	Wolf	NA	NA	Yes	0.559036	NA	NA	Canada	Ontario	Kapuskasing		150BP - Present	Historical	Historical							NA
AL2645	2012-003b				Oxford		Yes	Dog	NA	NA	Yes	3.79907	NA	NA	Russia	Cis_Baikal, Olkhonsky District, Irkutsk Province	Sagan_Nuge III		c.1300 AD	Siberian	Siberian Holocene							NA
AL2784	L4.6.1				Oxford		Yes	Dog	NA	NA	Yes	12.5315	A1b	A1b	USA	Quinhagak, Alaska	Nunalleq		c.1500 AD	Thule	Inuit							NA
AL2788	L3.15.1				Oxford		Yes	Dog	NA	NA	Yes	5.89974	A1b	NA	USA	Quinhagak, Alaska	Nunalleq		c.1500 AD	Thule	Inuit							NA
AL2791	15125.42.1				Oxford		Yes	Dog	NA	NA	Yes	16.0649	A1b	A1b	USA	Quinhagak, Alaska	Nunalleq		c.1500 AD	Thule	Inuit							NA
AL2792	12014.41.18				Oxford		Yes	Dog	NA	NA	Yes	1.08848	NA	NA	USA	Quinhagak, Alaska	Nunalleq		c.1500 AD	Thule	Inuit							NA
AL2794	14021.53.1				Oxford		Yes	Dog	NA	NA	Yes	6.33921	A1b	NA	USA	Quinhagak, Alaska	Nunalleq			Thule	Inuit							NA
AL2795	15173.109.1				Oxford		Yes	Dog	NA	NA	Yes	4.1222	A1b	NA	USA	Quinhagak, Alaska	Nunalleq			Thule	Inuit							NA
AL2797	12012.30.4				Oxford		Yes	Wolf	NA	NA	Yes	33.7295	Wolf	NA	USA	Quinhagak, Alaska	Nunalleq			Thule	Inuit							NA
AL2988	BOIS #1				Oxford		Yes		NA	NA	Yes	2.12489	NA	NA	Russia	Khasansky District, Primorsky Krai	Boisman II		7500 - 6000 cal BP	Palaeolithic	Siberian Holocene							NA
AL2989	BOIS #2				Oxford		Yes		NA	NA	Yes	4.93519	Wolf	NA	Russia	Khasansky District, Primorsky Krai	Boisman II		7500 - 6000 cal BP	Palaeolithic	Siberian Holocene							NA
AL2990	BOIS #3				Oxford		Yes		NA	NA	Yes	3.14342	Wolf	NA	Russia	Khasansky District, Primorsky Krai	Boisman II		7500 - 6000 cal BP	Palaeolithic	Siberian Holocene							NA
AL2991	BOIS #5				Oxford		Yes		NA	NA	Yes	8.60447	Wolf	NA	Russia	Khasansky District, Primorsky Krai	Boisman II		7500 - 6000 cal BP	Palaeolithic	Siberian Holocene							NA
AL2992	POS #24				Oxford		Yes		NA	NA	Yes	14.8413	Wolf	NA	Russia	Pospelovo, Primorsky Krai	Pospelovo_1		2800 to 2000 cal BP	Siberian	Siberian Holocene							NA
AL2994	BOIS #9				Oxford		Yes		NA	NA	Yes	2.15932	NA	NA	Russia	Khasansky District, Primorsky Krai	Boisman II		7500 - 6000 cal BP	Palaeolithic	Siberian Holocene							NA
AL2995	BOIS #10				Oxford		Yes		NA	NA	Yes	9.89245	Wolf	NA	Russia	Khasansky District, Primorsky Krai	Boisman II		7500 - 6000 cal BP	Palaeolithic	Siberian Holocene							NA
AL2997	CHER #14				Oxford		Yes		NA	NA	Yes	3.54863	Wolf	NA	Russia	Chernyatino, Primorsky Krai	Petropavlovsk_Kamchatsky		1800-1250 cal BP	Siberian	Siberian Holocene							NA
AL2998	RUS #2				Oxford		Yes		NA	NA	Yes	34.6938	A1b	A1b	Russia	Russky Island, Primorsky Krai	Russkii_1		Late Holocene	Siberian	Siberian Holocene							NA
AL3004	AL3004				Oxford		Yes	Dog	NA	NA	Yes	6.37371	Wolf	NA	Russia	Kamchatka Krai	Petropavlovsk_Kamchatsky		150BP - Present	Historical	Historical							NA
AL3007	StP_3437				Oxford		Yes	Dog	NA	NA	Yes	54.4091	Wolf	X- Clade	Russia	Kamchatka Krai	Petropavlovsk_Kamchatsky		150BP - Present	Historical	Historical							NA
AL3023	StP_5811				Oxford		Yes	Dog	NA	NA	Yes	4.83619	A1a	NA	Russia	Markovo, Chukotka Autonomous Okrug	Anadyr River		150BP - Present	Historical	Historical							NA
AL3031	StP_20033				Oxford		Yes	Dog	NA	NA	Yes	40.5807	A1b	A1b	Russia	Markovo, Chukotka Autonomous Okrug	Anadyr River		150BP - Present	Historical	Historical							NA
AL3032	StP_20039				Oxford		Yes	Dog	NA	NA	Yes	12.9481	Wolf	NA	Russia	Markovo, Chukotka Autonomous Okrug	Anadyr River		150BP - Present	Historical	Historical							NA
AL3052	StP_9290				Oxford		Yes	Dog	NA	NA	Yes	4.63371	Wolf	NA	Russia	Kamchatka Krai	Bering Island		150BP - Present	Historical	Historical							NA
AL3053	StP_9292				Oxford		Yes	Dog	NA	NA	Yes	7.47923	Wolf	NA	Russia	Kamchatka Krai	Bering Island		150BP - Present	Historical	Historical							NA
AL3054	StP_9299				Oxford		Yes	Dog	NA	NA	Yes	5.26795	Wolf	NA	Russia	Kamchatka Krai	Bering Island		150BP - Present	Historical	Historical							NA
AL3080	StP_14732				Oxford		Yes	Wolf	NA	NA	Yes	0.770072	NA	NA	Russia	Markovo, Chukotka Autonomous Okrug	Anadyr River		150BP - Present	Historical	Historical							NA
AL3198	HMCZ_38342		HMCZ_38342		Oxford		Yes	Dog	NA	NA	Yes	17.331	A2b	A2b	USA	Alaska	Uyak		2000 - 200 BP	Kachemak	Paleo-Inuit							NA
ALDF-30A-1568	NA			Brown, S.K. (VGL)	UC Davis	6/6/2014	Yes	Fail	Fail	NA	No	NA	NA	NA	Nova Scotia		Port Joli	AlDf-30A	AD 575 - 660	Mi'kmaq	Paleo-Inuit	Unit N52, W55; Level 3	Canis sp.	phalanx	distal epiphysis					Betts, Matthew	Canadian Museum of History	Betts, Matthew	2010-12
ALDF-30A-911	NA			Brown, S.K. (VGL)	UC Davis	10/8/2012	Yes	Dog	A11	TCCCCTATGTACGTCGTGCATTAATGGTTTGCCCCATGCATATAAGCATGTACATAATATTATATCCTTACATAGGACATATTAACTCAATCTCATAGTTCACTGATCTATCAACAGTAATCGAATGCATATCACTTAGTCCAATAAGGGCTTAATCACCATGCCTCGAGAAACCATCAACCCTTGCTCGTAATGTCCCTCTTCTCGCTCCGGGCCCATACTAACGTGGGGGTTACTATCATGAAACTATACCTGGCATCTGGTTCTTACTTCAGGGCCATAACTTTATTTACTCCAATCCTACTAATTCTCGCAAATGGGACATCTCGATGGACTAATGACTAATCAGCCCATGATCACAC	Yes	0.9	NA	NA	Nova Scotia		Port Joli	AlDf-30A	AD 575 - 660	Mi'kmaq	Paleo-Inuit	Unit N52, W55; Level 3A	Canis sp.	mandible	p2 sampled??					Betts, Matthew	Canadian Museum of History	Betts, Matthew	2010-12		1430 +/- 30 BP (associated charcoal)
ALDF-30A-912	NA			Brown, S.K. (VGL)	UC Davis	10/29/2013	No	Fail	Fail	NA	No	NA	NA	NA	Nova Scotia		Port Joli	AlDf-30A	AD 575 - 660	Mi'kmaq	Paleo-Inuit	Unit N52, W55; Level 3A	Canis sp.	mandible	p4 sampled??					Betts, Matthew	Canadian Museum of History	Betts, Matthew	2010-12		1430 +/- 30 BP (associated charcoal)
BELA-34679	NA			Brown, S.K. (VGL)	UC Davis	10/8/2012	Yes	DOG?	Fail	NA	Yes	1.1	NA	NA	Alaska	Kotzebue Sound	Cape Espenberg, Kotzebue Sound	49-KTZ-087, Feature 87	AD 1300 - 1450	early Thule	Inuit	Unit 1S/4E, NW quad, Level 2	Canis sp.	maxillary canine	complete	R	adult		modified - pendant	Darwent, C.M.	UC Davis/NPS-Alaska	Mason, Owen K.	8/2009	Norman et al. 2017
BELA-35135	NA			Brown, S.K. (VGL)	UC Davis	1/27/2012	No	Fail	Fail	NA	No	NA	NA	NA	Alaska	Kotzebue Sound	Cape Espenberg, Kotzebue Sound	49-KTZ-087, Feature 87	AD 1300 - 1450	early Thule	Inuit	Unit 5S/6E, SW quad, Level 2	Canis sp.	calcaneus	complete	R	adult		moderate weathering	Darwent, C.M.	UC Davis/NPS-Alaska	Goodsell, Joanne	8/2009	Brown et al. 2013: Table 1; Norman et al. 2017	used in initial aDNA extraction as "test" sample (consumed in analysis)
BELA-36031	NA			Brown, S.K. (VGL)	UC Davis	1/19/2011	Yes	Wolf	Alaska2 (KF661066.1)	NNNNNNNNNNNNNNNNNNNNNNNNNNNNNNNNNNNNNNNNNNNNNNNNNNNNNNNNNNNNNNNNNNNNNNNNNNNNNNNNNNNNNNNNNNNNNNNNNNCCCTCCCCNTATGTACGTCGTGCATTAATGGTTTGCCCCATGCATATAAGCATGTACATAATATTATATTCTTACATAGGANCATATTAACTCAATCTCATAATTCACTGATCTATCAGCAGTAATCAAATGCATATCACTTAGTCCAATAAGGGCTTAATCACCATGCCTCGAGAAACCATNNNCAACCCTTGCTCGTANATGTCCCTCTTCTCGCTCCGGGCCCATACTANACGTGGGGGTTACTATCATGAAACTATACCTGGCATCTGGNTTCTTACCTCAGGGCCANNNTNANACT…	No	NA	NA	NA	Alaska	Kotzebue Sound	Cape Espenberg, Kotzebue Sound	49-KTZ-304, Feature 21	AD 1260 - 1400	early Thule	Inuit	Unit 6N/4E, NE quad, Level 1E (tunnel/kitchen area)	Canis sp.	metacarpal	complete		adult		n/a	Darwent, C.M.	UC Davis/NPS-Alaska	Neffe, Angelique	6/2010	Brown et al. 2013: Table 1	fomrerly sample #40
BELA-36034	NA			Brown, S.K. (VGL)	UC Davis	1/27/2012	Yes	Dog	A2a	ATGTACGTCGTGCATTAATGGTTTGCCCCATGCATATAAGCATGTACATAATATTATATCCTTACATAGGACATATTAACTCAATCTCATAGTTCACTGATCTACCAACAGTAATCGAATGCATATCACTTAGTCCAATAAGGGCTTAATCACCATGCCTCGAGAAACCATCAACCCTTGCTCGTAATGTCCCTCTTCTCGCTCCGGGCCCATACTAACGTGGGGGTTACTATCATGAAACTATACCTGGCATCTGGTTCTTACTTCAGGGCCATAACTTTATTTACTCCAATCCTACTAATTCTCGCAAATGGGACATCTCGATGGACTAATGACTAATCAGCCCATGATCACACAT	No	NA	NA	NA	Alaska	Kotzebue Sound	Cape Espenberg, Kotzebue Sound	49-KTZ-304, Feature 21	AD 1260 - 1400	early Thule	Inuit	Unit 4N/3E, SW quad, Level 1E (tunnel)	Canis sp.	cranium	complete (R: I1-C, P2-M2; L: I1-I3, P4-M2); P2 sampled	n/a	adult (no wear)		impact scar + 2 holes in frontals (fresh fractures)	Darwent, C.M.	UC Davis/NPS-Alaska	Neffe, Angelique	7/2010	Brown et al. 2013: Table 1
BELA-36035	NA			Brown, S.K. (VGL)	UC Davis	1/19/2011	Yes	Dog	A2a	ATGTACGTCGTGCATTAATGGTTTGCCCCATGCATATAAGCATGTACATAATATTATATCCTTACATAGGACATATTAACTCAATCTCATAGTTCACTGATCTACCAACAGTAATCGAATGCATATCACTTAGTCCAATAAGGGCTTAATCACCATGCCTCGAGAAACCATCAACCCTTGCTCGTAATGTCCCTCTTCTCGCTCCGGGCCCATACTAACGTGGGGGTTACTATCATGAAACTATACCTGGCATCTGGTTCTTACTTCAGGGCCATAACTTTATTTACTCCAATCCTACTAATTCTCGCAAATGGGACATCTCGATGGACTAATGACTAATCAGCCCATGATCACACAT	No	NA	NA	NA	Alaska	Kotzebue Sound	Cape Espenberg, Kotzebue Sound	49-KTZ-304, Feature 21	AD 1260 - 1400	early Thule	Inuit	Unit 4N/6E, SW quad, Level 1E (side spur kitchen area)	Canis sp.	cranium	maxilla + orbits (P2, M2); P2 sampled	n/a	adult (no wear)		n/a	Darwent, C.M.	UC Davis/NPS-Alaska	Junge, Justin	7/2010	Brown et al. 2013: Table 1	*REINTEGRATE SAMPLED TEETH WITH MAXILLARY FRAGMENT
BELA-37367	NA			Brown, S.K. (VGL)	UC Davis	1/27/2012	No	Fail	Fail	NA	No	NA	NA	NA	Alaska	Kotzebue Sound	Cape Espenberg, Kotzebue Sound	49-KTZ-088, Feature 33	AD 1675 - 1800	late Thule (Inupiaq)	Inuit	Unit 10N/1E, NW quad, Level 1B (tunnel)	Canis sp.	radius + ulna	prox + 1/2 shaft (articulated)	R	adult		spiral fracture at midshaft; carnivore gnawing on prox end	Darwent, C.M.	UC Davis/NPS-Alaska	Mereuze, Remi	7/2010	Brown et al. 2013: Table 1
BELA-37368	NA			Brown, S.K. (VGL)	UC Davis	1/27/2012	Yes	Dog	A1b	NNNNNNNNNNNNNNNNNNNNNNNNNNNNNNNNNNNNNNNNNNNNNNNNNNNNNNNNNNNNNNNNNNNNNNNNNNNNNNNNNNNNNNNNNNNNNNNNNNNNNNNNNNNNNNNNNNNNNNNNNNNNNNNNNNNNNNNNNNNNNNNNNNNNNNNNNNNNNNNNNNNNNNNNNNNNNNNNNNNNNNNNNNNNNNNNNNNNNNNNNNNNNNNNNNNNNNNNNNNNNNNNNNNNNNNNNNNNNNNNNNNNNNNNNNNNNNNNAATCACCATGCCTCGAGAAACCATNNNCAACCCTTGCTCGTANATGTCCCTCTTCTCGCTCCGGGCCCATACTANACGTGGGGGTTACTATCATGAAACTATACCTGGCATCTGGNTTCTTACTTCAGGGCCANNNTNANACT…	Yes	0.5	NA	NA	Alaska	Kotzebue Sound	Cape Espenberg, Kotzebue Sound	49-KTZ-088, Feature 33	AD 1675 - 1800	late Thule (Inupiaq)	Inuit	Unit 6N/6E, NW quad, Level 1B (side spur kitchen area)	Canis sp.	radius + ulna	prox + 3/4 shaft	R	adult		carnivore punctures midshaft; carnivore gnawing on both ends	Darwent, C.M.	UC Davis/NPS-Alaska	Mereuze, Remi	7/2010	Brown et al. 2013: Table 1
BELA-37369	NA			Brown, S.K. (VGL)	UC Davis	1/27/2012	Yes	Dog	A1b	CTGAGATTCTTCTTAAACTATTCCCTGACACCCCTACATTCATATATTGAATCACCCCTACTGTGCTATGTCAGTATCTCCAGGTAAACCCTTCTCCCCTCCCCTATGTACGTCGTGCATTAATGGTTTGCCCCATGCATATAAGCATGTACATAATATTATATCCTTACATAGGACATATTAACTCAATCTCATAGTTCACTGATCTATCAACAGTAATCAAATGCATATCACTTAGTCCAATAAGGGCTTAATCACCATGCCTCGAGAAACCATCAACCCTTGCTCGTAATGTCCCTCTTCTCGCTCCGGGCCCATACTAACGTGGGGGTTACTATCATGAAACTATACCTGGCATCTGGTTCTTACTTCAGGGCCATAACTTTATTTACTCCAATC…	Yes	37.8	A1b	A1b	Alaska	Kotzebue Sound	Cape Espenberg, Kotzebue Sound	49-KTZ-088, Feature 33	AD 1675 - 1800	late Thule (Inupiaq)	Inuit	Unit 4N/2E, SE quad, Level 2B (front of sleeping platform)	Canis sp.	radius + ulna	complete	R	adult		4 fine cuts on dist/post shaft of ulna, perpendicular to shaft	Darwent, C.M.	UC Davis/NPS-Alaska	Dussault, Frederick	8/2010	Brown et al. 2013: Table 1
BELA-37370	NA			Brown, S.K. (VGL)	UC Davis	1/27/2012	Yes	Dog	A2a	NNNNNNNNNNNNNNNNNNNNNNNNNNNNNNNNNNNNNNNNNNNNNNNNNNNNNNNNNNNNNNNNNNNNNNNNNNNNNNNNNNNNNNNNNNNNNNNNNNCCCTCCCCNTATGTACGTCGTGCATTAATGGTTTGCCCCATGCATATAAGCATGTACATAATATTATATCCTTACATAGGANCATATTAACTCAATCTCATAGTTCACTGATCTACCAACAGTAATCGAATGCATATCACTTAGTCCAATAAGGGCTTAATCACCATGCCTCGAGAAACCATNNNCAACCCTTGCTCGTANATGTCCCTCTTCTCGCTCCGGGCCCATACTANACGTGGGGGTTACTATCATGAAACTATACCTGGCATCTGGNTTCTTACTTCAGGGCCANNNTNANACT…	Yes	1.2	NA	NA	Alaska	Kotzebue Sound	Cape Espenberg, Kotzebue Sound	49-KTZ-087, Feature 68A	AD 1450 - 1650	middle Thule	Inuit	Unit 9N/3E, SE quad, Level 3B (house/cold trap entrance)	Canis sp.	cranium	maxillary fragment (p2-m2)	L	adult (no wear)		n/a	Darwent, C.M.	UC Davis/NPS-Alaska	Erickson, Kaare	7/2010	Brown et al. 2013: Table 1
BELA-37371	NA			Brown, S.K. (VGL)	UC Davis	1/27/2012	Yes	Wolf	Alaska2 (KF661066.1)	CTGAAATTCTTCTTAAACTATTCCCTGACACCCCTACATTCATATATTGAATCACCCCTACTGTGCTATGTCAGTATCTCCAGGTAAACCCTTCTTCCCTCCCCCTATGTACGTCGTGCATTAATGGTTTGCCCCATGCATATAAGCATGTACATAATATTATATTCTTACATAGGACATATTAACTCAATCTCATAATTCACTGATCTATCAGCAGTAATCAAATGCATATCACTTAGTCCAATAAGGGCTTAATCACCATGCCTCGAGAAACCATCAACCCTTGCTCGTAATGTCCCTCTTCTCGCTCCGGGCCCATACTAACGTGGGGGTTACTATCATGAAACTATACCTGGCATCTGGTTCTTACCTCAGGGCCATAACTTTATTTACTCCAAT…	Yes	19.7	WOLF	NA	Alaska	Kotzebue Sound	Cape Espenberg, Kotzebue Sound	49-KTZ-087, Feature 68A	AD 1450 - 1650	middle Thule	Inuit	Unit 7N/4E, SW quad, Level 3A (house/tunnel floor)	Canis sp.	mandible	complete (p1-m3); p1 sampled	L	old adult (heavy wear)		n/a	Darwent, C.M.	UC Davis/NPS-Alaska	Benzce, Jennifer	7/2010	Brown et al. 2013: Table 1
BELA-37372	NA			Brown, S.K. (VGL)	UC Davis	1/27/2012	Yes	Dog	A2a	NNNNNNNNNNNNNNNNNNNNNNNNNNNNNNNNNNNNNNNNNNNNNNNNNNNNNNNNNNNNNNNNNNNNNNNNNNNNNNNNNNNNNNNNNNNNNNNNNNCCCTCCCCNTATGTACGTCGTGCATTAATGGTTTGCCCCATGCATATAAGCATGTACATAATATTATATCCTTACATAGGANCATATTAACTCAATCTCATAGTTCACTGATCTACCAACAGTAATCGAATGCATATCACTTAGTCCAATAAGGGCTTAATCACCATGCCTCGAGAAACCATNNNCAACCCTTGCTCGTANATGTCCCTCTTCTCGCTCCGGGCCCATACTANACGTGGGGGTTACTATCATGAAACTATACCTGGCATCTGGNTTCTTACTTCAGGGCCANNNTNANACT…	Yes	0	NA	NA	Alaska	Kotzebue Sound	Cape Espenberg, Kotzebue Sound	49-KTZ-304, Feature 21	AD 1260 - 1400	early Thule	Inuit	Unit 4N/3E, SW quad, Level 1E (tunnel)	Canis sp.	cranium	MISSING?				n/a	Darwent, C.M.	UC Davis/NPS-Alaska	Neffe, Angelique	7/2010	NOT IN 2013 PUBLICATION?
BELA-37373	NA			Brown, S.K. (VGL)	UC Davis	1/27/2012	Yes	Dog	A2b	NNNNNNNNNNNNNNNNNNNNNNNNNNNNNNNNNNNNNNNNNNNNNNNNNNNNNNNNNNNNNNNNNNNNNNNNNNNNNNNNNNNNNNNNNNNNNNNNNNCCCTCCCCNTATGTACGTCGTGCATTAATGGTTTGCCCCATGCATATAAGCATGTACATAATATTATATTCTTACATAGGANCATATTAACTCAATCTCATAGTTCACTGATCTATCAACAGTAATCGAATGCATATCACTTAGTCCAATAAGGGCTTAATCACCATGCCTCGAGAAACCATNNNCAACCCTTGCTCGTANATGTCCCTCTTCTCGCTCCGGGCCCATACTANACGTGGGGGTTACTATCATGAAACTATACCTGGCATCTGGNTTCTTACTTCAGGGCCANNNTNANACT…	Yes	5.1	A2b	NA	Alaska	Kotzebue Sound	Cape Espenberg, Kotzebue Sound	49-KTZ-304, Feature 21	AD 1260 - 1400	early Thule	Inuit	Unit 9N/4E, SE quad, Level 2A (house interior)	Canis sp.	mandible	body (p1-m2); p2 sampled	R	adult (no wear)		moderate to heavy weathering; lower border of mandiblular body eroded away	Darwent, C.M.	UC Davis/NPS-Alaska	Stachel, Zoe	7/2010	Brown et al. 2013: Table 1
BELA-37374	NA			Brown, S.K. (VGL)	UC Davis	1/31/2012	Yes	Dog	A2b	GTACGTCGTGCATTAATGGTTTGCCCCATGCATATAAGCATGTACATAATATTATATCCTTACATAGGACATATTAACTCAATCTCATAGTTCACTGATCTATCAACAGTAACCGAATGCATATCACTTAGTCCAATAAGGGCTTAATCACCATGCCTCGAGAAACCATCAACCCTTGCTCGTAATGTCCCTCTTCTCGCTCCGGGCCCATACTAACGTGGGGGTTACTATCATGAAACTATACCTGGCATCTGGTTCTTACTTCAGGGCCATAACTTTATTTACTCCAATCCTACTAATTCTCGCAAATGGGACATCTCGATGGACTAATGACTAATCAGCCCATGATCACAC	Yes	34.2	A2b	A2b	Alaska	Kotzebue Sound	Cape Espenberg, Kotzebue Sound	49-KTZ-304, Feature 21	AD 1260 - 1400	early Thule	Inuit	Unit 9N/3E, SE quad, Level 2A (house interior)	Canis sp.	mandible	complete (incisors, c, p2-m3); p2 sampled	R	adult (slight wear)		congenital absence of p1	Darwent, C.M.	UC Davis/NPS-Alaska	n/a	7/2010	Brown et al. 2013: Table 1	paired with matching left mandible (sampled for isotopes)
BELA-37375	NA			Brown, S.K. (VGL)	UC Davis	1/31/2012	Yes	Dog	A1b	CTGAGATTCTTCTTAAACTATTCCCTGACACCCCTACATTCATATATTGAATCACCCCTACTGTGCTATGTCAGTATCTCCAGGTAAACCCTTCTCCCCTCCCCTATGTACGTCGTGCATTAATGGTTTGCCCCATGCATATAAGCATGTACATAATATTATATCCTTACATAGGACATATTAACTCAATCTCATAGTTCACTGATCTATCAACAGTAATCAAATGCATATCACTTAGTCCAATAAGGGCTTAATCACCATGCCTCGAGAAACCATCAACCCTTGCTCGTAATGTCCCTCTTCTCGCTCCGGGCCCATACTAACGTGGGGGTTACTATCATGAAACTATACCTGGCATCTGGTTCTTACTTCAGGGCCATAACTTTATTTACTCCAATC…	Yes	7.8	A1b	NA	Alaska	Kotzebue Sound	Cape Espenberg, Kotzebue Sound	49-KTZ-304, Feature 21	AD 1260 - 1400	early Thule	Inuit	Unit 4N/3E, NW quad, Level 2A (side spur kitchen area)	Canis sp.	mandible	complete (incisors, c, p2-m3): p2 sampled	R	adult (slight wear)		congenital absence of p1	Darwent, C.M.	UC Davis/NPS-Alaska	Hoffecker, John F.	8/2010	Brown et al. 2013: Table 1
BELA-37376	NA			Brown, S.K. (VGL)	UC Davis	1/31/2012	Yes	Dog	A1b	GCTGAGATTCTTCTTAAACTATTCCCTGACACCCCTACATTCATATATTGAATCACCCCTACTGTGCTATGTCAGTATCTCCAGGTAAACCCTTCTCNCCCTCCCCNTATGTACGTCGTGCATTAATGGTTTGCCCCATGCATATATGCATGTACATAATATTATATCCTTACATAGGANCATATTAACTCAATCTCATAGTTCACTGATCTATCAACAGTAATCAAATGCATATCACTTAGTCCAATAAGGGCTTAATCACCATGCCTCGAGAAACCATNNNCAACCCTTGCTCGTANATGTCCCTCTTCTCGCTCCGGGCCCATACTANACGTGGGGGTTACTATCATGAAACTATACCTGGCATCTGGNTTCTTACTTCAGGGCCANNNTNANACT…	Yes	1.1	NA	NA	Alaska	Kotzebue Sound	Cape Espenberg, Kotzebue Sound	49-KTZ-304, Feature 21	AD 1260 - 1400	early Thule	Inuit	Unit 5N/4E, NE quad, Level 1C (tunnel/kitchen spur)	Canis sp.	mandible	mandibular condyle to mesial tip (c, p2 root, p3, m1-m2)	R	adult (no wear)		congenital absence of p1; alveolar resorption of p4; chopped parallel to body under m2 on labial surface	Darwent, C.M.	UC Davis/NPS-Alaska	Weingarten, Neil	7/2010	Brown et al. 2013: Table 1	paired with matching left mandible (m1 only); congenital absence of p1, aveolar absorption of p3
BELA-37940	NA			Brown, S.K. (VGL)	UC Davis	1/31/2012	Yes	Wolf	JX185398	CCCTCCCCTATGTACGTCGTGCATTAATGGTTTGCCCCATGCATATAAGCATGTACATAATATTATATTCTTACATAGGACATATTAACTCAATCTCATAATTCACTGATCTATCAGCAGTAATCAAATGCATATCACTTAGTCCAATAAGGGCTTAATCACCATGCCTCGAGAAACAAGAAACA	No	NA	NA	NA	Alaska	Kotzebue Sound	Cape Espenberg, Kotzebue Sound	49-KTZ-087, Feature 87	AD 1300 - 1450	early Thule	Inuit	Unit 9S/3E, SE quad, Level 2E (kitchen, "ritual feature")	Canis sp.	maxillary canine	complete	L	adult		grooved around circumference of root; pendant	Darwent, C.M.	UC Davis/NPS-Alaska	O'Rourke, Mike	7/2011	Brown et al. 2013: Table 1; Norman et al. 2017
BELA-52965	NA			Brown, S.K. (VGL)	UC Davis	7/2/2012	Yes	Dog	A2b	GTACGTCGTGCATTAATGGTTTGCCCCATGCATATAAGCATGTACATAATATTATATCCTTACATAGGACATATTAACTCAATCTCATAGTTCACTGATCTATCAACAGTAACCGAATGCATATCACTTAGTCCAATAAGGGCTTAATCACCATGCCTCGAGAAACCATCAACCCTTGCTCGTAATGTCCCTCTTCTCGCTCCGGGCCCATACTAACGTGGGGGTTACTATCATGAAACTATACCTGGCATCTGGTTCTTACTTCAGGGCCATAACTTTATTTACTCCAATCCTACTAATTCTCGCAAATGGGACATCTCGATGGACTAATGACTAATCAGCCCATGATCACAC	Yes	5.9	A2b	NA	Alaska	Kotzebue Sound	Cape Espenberg, Kotzebue Sound	49-KTZ-087, Feature 68B	AD 1450 - 1650	middle Thule	Inuit	Unit 6N/8E, NE quad, floor	Canis sp.	cranium	complete	n/a	adult		n/a	Darwent, C.M.	UC Davis/NPS-Alaska	Slaughter, Dale C.	7/2011
BELA-52966	NA			Brown, S.K. (VGL)	UC Davis	7/17/2012	Yes	Fail	Fail	NA	Yes	0	NA	NA	Alaska	Kotzebue Sound	Cape Espenberg, Kotzebue Sound	49-KTZ-087, Feature 68B	AD 1450 - 1650	middle Thule	Inuit	Unit 5N/8E, 180 cm BD (floor)	Canis sp.	cranium	premaxilla, nasal + partial frontal	n/a	adult		n/a	Darwent, C.M.	UC Davis/NPS-Alaska	Slaughter, Dale C.	7/2011
BELA-59973	NA			Brown, S.K. (VGL)	UC Davis	6/12/2014	Yes	Dog	A2a	NNNNNNNNNNNNNNNNNNNNNNNNNNNNNNNNNNNNNNNNNNNNNNNNNNNNNNNNNNNNNNNNNNNNNNNNNNNNNNNNNNNNNNNNNNNNNNNNNNNNNNNNNNNNNNNNNNNNNNNNNNNNNNNNNNNNNNNNNNNNNNNNNNNNNNNNNNNNNNNNNNNNNNNNNNNNNNNNNNNNNNNNNNNNNNNNNNNNNNNNNNNNNNNNNNNNNNNNNNNNNNNNNNNNNNNNNNNNNNNNNNNNNNNNNNNNNCTTAATCACCATGCCTCGAGAAACCATNNNCAACCCTTGCTCGTANATGTCCCTCTTCTCGCTCCGGGCCCATACTANACGTGGGGGTTACTATCATGAAACTATACCTGGCATCTGGNTTCTTACTTCAGGGCCANNNTNANACT…	Yes	0.7	NA	NA	Alaska	Kotzebue Sound	Cape Espenberg, Kotzebue Sound	49-KTZ-087, Feature 87	AD 1300 - 1450	early Thule	Inuit	Unit 5S/2E, NE quad, Level 3B	Canis sp.	metacarpal 5	complete	L	adult		n/a	Darwent, C.M.	UC Davis/NPS-Alaska	n/a	7/2011	Norman et al. 2017
BELA-59974	NA			Brown, S.K. (VGL)	UC Davis	6/12/2014	Yes	Dog	A2b	NNNNNNNNNNNNNNNNNNNNNNNNNNNNNNNNNNNNNNNNNNNNNNNNNNNNNNNNNNNNNNNNNNNNNNNNNNNNNNNNNNNNNNNNNNNNNNNNNNNNNNNNNNNNNNNNNNNNNNNNNNNNNNNNNNNNNNNNNNNNNNNNNNNNNNNNNNNNNNNNNNNNNNNNNNNNNNNNNNNNNNNNNNNNNNNNNNNNNNNNNNNNNNNNNNNNNNNNNNNNNNNNNNNNNNNNNNNNNNNNNNNNNNNNNNNNTCTTAATCACCATGCCTCGAGAAACCATNNNCAACCCTTGCTCGTANATGTCCCTCTTCTCGCTCCGGGCCCATACTANACGTGGGGGTTACTATCATGAAACTATACCTGGCATCTGGNTTCTTACTTCAGGGCCANNNTNANACT…	Yes	1.5	NA	NA	Alaska	Kotzebue Sound	Cape Espenberg, Kotzebue Sound	49-KTZ-087, Feature 87	AD 1300 - 1450	early Thule	Inuit	Unit 14S/2E, NE/NW quads, Level 2E	Canis sp.	metacarpal 5	complete	L	adult		n/a	Darwent, C.M.	UC Davis/NPS-Alaska	n/a	7/2011	Norman et al. 2017
BELA-59975	NA			Brown, S.K. (VGL)	UC Davis	6/12/2014	Yes	Dog	A2a	NNNNNNNNNNNNNNNNNNNNNNNNNNNNNNNNNNNNNNNNNNNNNNNNNNNNNNNNNNNNNNNNNNNNNNNNNNNNNNNNNNNNNNNNNNNNNNNNNNNNNNNNNNNNNNNNNNNNNNNNNNNNNNNNNNNNNNNNNNNNNNNNNNNNNNNNNNNNNNNNNNNNNNNNNNNNNNNNNNNNNNNNNNNNNNNNNNNNNNNNNNNNNNNNNNNNNNNNNNNNNNNNNNNNNNNNNNNNNNNNNNNNNNNNNNNNTCTTAATCACCATGCCTCGAGAAACCATNNNCAACCCTTGCTCGTANATGTCCCTCTTCTCGCTCCGGGCCCATACTANACGTGGGGGTTACTATCATGAAACTATACCTGGCATCTGGNTTCTTACTTCAGGGCCANNNTNANACT…	Yes	2	NA	NA	Alaska	Kotzebue Sound	Cape Espenberg, Kotzebue Sound	49-KTZ-304, Feature 12	AD 1000 - 1250	Birnirk/early Thule	Inuit	Unit 4N/4E, NE quad, Level 2B	Canis sp.	mandible	complete (incisors, p2-m2); incisors sampled		adult (moderate wear)		congenital absence of p1	Darwent, C.M.	UC Davis/NPS-Alaska	Darwent, C.M.	7/2011
BELA-59976	NA			Brown, S.K. (VGL)	UC Davis	6/12/2014	Yes	Dog	A1, A2, A5?	NNNNNNNNNNNNNNNNNNNNNNNNNNNNNNNNNNNNNNNNNNNNNNNNNNNNNNNNNNNNNNNNNNNNNNNNNNNNNNNNNNNNNNNNNNNNNNNNNNCCCTCCCCNTATGTACGTCGTGCATTAATGGTTTGCCCCATGCATATAAGCATGTACATAATATTATATCCTTACATAGGANCATATTAACTCAATCTCATAGTTCACTGATCTATCAACAGTAATCGAATGCATATCACTTAGTCCAATAAGGGCTTAATCACCATGCCTCGAGAAACCATNNNCAACCCTTGCTCGTANATGTCCCTCTTCTCGCTCCGGGCCCATACTANACGTGGGGGTTACTATCATGAAACTATACCTGGCATCTGGNTTCTTACTTCAGGGCCANNNTNANACT…	Yes	0.4	NA	NA	Alaska	Kotzebue Sound	Cape Espenberg, Kotzebue Sound	49-KTZ-304, Feature 12	AD 1000 - 1250	Birnirk/early Thule	Inuit	Unit 5N/5E, Level 1A	Canis sp.	mandible	complete (p3-m2); p3 sampled	R	adult (slight wear)		congenital absence of p1	Darwent, C.M.	UC Davis/NPS-Alaska	Cesario, Grace	7/2011
BELA-59977	NA			Brown, S.K. (VGL)	UC Davis	6/12/2014	Yes	Fail	Fail	NA	Yes	0.6	NA	NA	Alaska	Kotzebue Sound	Cape Espenberg, Kotzebue Sound	49-KTZ-304, Feature 12	AD 1000 - 1250	Birnirk/early Thule	Inuit	Unit 5N/1E, Level 1B	Canis sp.	mandible	complete (incisors, c, p2-m2); incisors sampled	L	adult (chipped)		congenital absence of p1	Darwent, C.M.	UC Davis/NPS-Alaska	Ewing, Diana E.	7/2011
BELA-59978	NA			Brown, S.K. (VGL)	UC Davis	6/12/2014	Yes	Fail	Fail	NA	Yes	0.4	NA	NA	Alaska	Kotzebue Sound	Cape Espenberg, Kotzebue Sound	49-KTZ-304, Feature 12	AD 1000 - 1250	Birnirk/early Thule	Inuit	Unit 4N/3E, Level 1B	Canis sp.	mandible	body only (p2-m2, tooth roots only); m1 sampled	R	adult		indeterminate if p1 is absent	Darwent, C.M.	UC Davis/NPS-Alaska	Dougherty, Jennifer E.	7/2011
BELA-59979	NA			Brown, S.K. (VGL)	UC Davis	6/12/2014	Yes	Fail	Fail	NA	Yes	0.5	NA	NA	Alaska	Kotzebue Sound	Cape Espenberg, Kotzebue Sound	49-KTZ-304, Feature 12	AD 1000 - 1250	Birnirk/early Thule	Inuit	Unit 1N/1E, NW quad, Level 2B	Canis sp.	mandible	complete (p2, p3-m2); mesial tip absent; p3 sampled	R	adult (slight wear)		congenital absence of p1	Darwent, C.M.	UC Davis/NPS-Alaska	Tremayne, Andrew	7/2011
BELA-59980	NA			Brown, S.K. (VGL)	UC Davis	6/12/2014	Yes	Fail	Fail	NA	Yes	0.2	NA	NA	Alaska	Kotzebue Sound	Cape Espenberg, Kotzebue Sound	49-KTZ-304, Feature 12	AD 1000 - 1250	Birnirk/early Thule	Inuit	Unit 2N/1E, Level 1C	Canis sp.	mandible	complete (c, p2, m1-m2); canine sampled	R	adult (worn)		congenital absence of p1; alveolar resorption of p3-p4)	Darwent, C.M.	UC Davis/NPS-Alaska	Cesario, Grace	7/2011		ascending ramus + condyles in fragments; only body remains intact
BELA-59981	NA			Brown, S.K. (VGL)	UC Davis	6/12/2014	Yes	Wolf	Indeterminate	NNNNNNNNNNNNNNNNNNNNNNNNNNNNNNNNNNNNNNNNNNNNNNNNNNNNNNNNNNNNNNNNNNNNNNNNNNNNNNNNNNNNNNNNNNNNNNNNNNCCCTCCCCNTATGTACGTCGTGCATTAATGGTTTGCCCCATGCATATAAGCATGTACATAATATTATATTCTTACATAGGANCATATTAACTCAATCTCATAATTCACTGATCTATCAGCAGTAATCAAATGCATATCACTTAGTCCAATAAGGGCTTAATCACCATGCCTCGAGAAACCATNNNCAACCCTTGCTCGTANATGTCCCTCTTCTCGCTCCGGGCCCATACTANACGTGGGGGTTACTATCATGAAACTATACCTGGCATCTGGNTTCTTACCTCAGGGCCANNNTNANACT…	Yes	1	NA	NA	Alaska	Kotzebue Sound	Cape Espenberg, Kotzebue Sound	49-KTZ-304, Feature 12	AD 1000 - 1250	Birnirk/early Thule	Inuit	Unit 1N/4E, SE quad, Level 2B	Canis lupus lupus	mandible	complete (incisors, c, p2-m2); incisors sampled	R	adult (no wear)		n/a	Darwent, C.M.	UC Davis/NPS-Alaska	Tremayne, Andrew	7/2011
BELA-59982	NA			Brown, S.K. (VGL)	UC Davis	6/12/2014	Yes	Fail	Fail	NA	Yes	0.2	NA	NA	Alaska	Kotzebue Sound	Cape Espenberg, Kotzebue Sound	49-KTZ-304, Feature 12	AD 1000 - 1250	Birnirk/early Thule	Inuit	Unit 7N/2E, Level 1B	Canis sp.	mandible	distal 1/2 body + ascending ramus (p4-m2); m2 sampled	R	adult (no wear)		n/a	Darwent, C.M.	UC Davis/NPS-Alaska	Darwent, C.M.	7/2011
BK-H-3935	NA			Brown, S.K. (VGL)	UC Davis	6/18/2012	No	Fail	Fail	NA	No	NA	NA	NA	Alaska	North Slope	Piġniq (Birnirk), North Slope	49-BAR-001, Mound H	AD 600 - 1300	Birnirk	Inuit	Unit S1, E3; 5.0-5.5' BS	Canis sp.	cranium	complete (R: P2, P4-M2; L: P4-M2)	n/a	adult		premaxilla broken	Brown, S.K./ F. Carter	UA Museum of the North	Carter, Wilbert	8/23/1953		sampled for radiocarbon dating (UAMN); formerly ADM.R.-9717
CK-H10-H1	NA			Brown, S.K. (VGL)	UC Davis	7/30/2012	Yes	Wolf	Alaska2 (KF661066.1)	CTGAAATTCTTCTTAAACTATTCCCTGACACCCCTACATTCATATATTGAATCACCCCTACTGTGCTATGTCAGTATCTCCAGGTAAACCCTTCTTCNNNNNNNNNNNNNNNNNNNNNNNNNNNNGGTTTGCCCCATGCATATAAGCATGTACATAATATTATATTCTTACATAGGACATATTAACTCAATCTCATAATTCACTGATCTATCAGCAGTAATCAAATGCATATCACTTAGTCCAATAAGGGCTTAATCACCATGCCTCGAGAAACCATCAACCCTTGCTCGTAATGTCCCTCTTCTCGCTCCGGGCCCATACTAACGTGGGGGTTACTATCATGAAACTATACCTGGCATCTGGTTCTTACCTCAGGGCCATAACTTTATTTACTCCAAT…	Yes	7.4	WOLF	NA	Alaska	Kotzebue Sound	Cape Krusenstern, Kotzebue Sound	49-NOA-002, House 10	AD 690 - 950	Ipiutak	Inuit	n/a	Canis sp.	humerus	dist + 1/2 shaft	R	adult		spiral fracture	Darwent, C.M.	Haffenreffer Museum	Giddings, J. Louis	1958-61	Anderson & Freeburg 2013; Giddings & Anderson 1986
CK-H10-M1	NA			Brown, S.K. (VGL)	UC Davis	7/30/2012	No	Fail	Fail	NA	No	NA	NA	NA	Alaska	Kotzebue Sound	Cape Krusenstern, Kotzebue Sound	49-NOA-002, House 10	AD 690 - 950	Ipiutak	Paleo-Inuit	n/a	Canis sp.	mandible	complete (molars not erupted)	L	juvenile		n/a	Darwent, C.M.	Haffenreffer Museum	Giddings, J. Louis	1958-61	Anderson & Freeburg 2013; Giddings & Anderson 1986
CK-H22-P1	NA			Brown, S.K. (VGL)	UC Davis	7/17/2012	No	Fail	Fail	NA	No	NA	NA	NA	Alaska	Kotzebue Sound	Cape Krusenstern, Kotzebue Sound	49-NOA-002, House 22	BC 1150 - 850	Old Whaling	Paleo-Inuit	n/a	Canis sp.	phalanx 1	prox + 1/4 shaft		adult		n/a	Darwent, C.M.	Haffenreffer Museum	Giddings, J. Louis	1960-61	Darwent & Darwent 2016; Giddings & Anderson 1986
CK-H32-M1	NA			Brown, S.K. (VGL)	UC Davis	7/2/2012	Yes	Dog	A1b	ATGTACGTCGTGCATTAATGGTTTGCCCCATGCATATAAGCATGTACATAATATTATATCCTTACATAGGACATATTAACTCAATCTCATAGTTCACTGATCTATCAACAG-TAATCAAATGCATATCACTTAGTCCAATAAGGGCTTAATCACCATGCCTCGAGAAACCATCAACCCTTGCTCGTAATGTCCCTCTTCTCGCTCCGGGCCCATACTAACGTGGGGGTTACTATCATGAAACTATACCTGGCATCTGGTTCTTACTTCAGGGCCATAA-CTTTATTTACTCCAATCCTACTAATTCTCGCAAATGGGACATCTCGATGGACTAATGACTAATCAGCCCATGATCACA	Yes	2.3	NA	NA	Alaska	Kotzebue Sound	Cape Krusenstern, Kotzebue Sound	49-NOA-002, House 32	AD 650 - 1150	Birnirk	Inuit	n/a	Canis sp.	mandible	complete (R: c, p2-m2; L: c, p3-m2)	R+L	adult (slight wear)		congenital absence of p1	Darwent, C.M.	Haffenreffer Museum	Giddings, J. Louis	1958-61	Giddings & Anderson 1986
CK-H32-M2	NA			Brown, S.K. (VGL)	UC Davis	7/2/2012	Yes	Dog	A2a	ATGTACGTCGTGCATTAATGGTTTGCCCCATGCATATAAGCATGTACATAATATTATATCCTTACATAGGACATATTAACTCAATCTCATAGTTCACTGATCTATCAACAG-TAATCAAATGCATATCACTTAGTCCAATAAGGGCTTAATCACCATGCCTCGAGAAACCATCAACCCTTGCTCGTAATGTCCCTCTTCTCGCTCCGGGCCCATACTAACGTGGGGGTTACTATCATGAAACTATACCTGGCATCTGGTTCTTACTTCAGGGCCATAA-CTTTATTTACTCCAATCCTACTAATTCTCGCAAATGGGACATCTCGATGGACTAATGACTAATCAGCCCATGATCACA	Yes	2.9	NA	NA	Alaska	Kotzebue Sound	Cape Krusenstern, Kotzebue Sound	49-NOA-002, House 32	AD 650 - 1150	Birnirk	Inuit	n/a	Canis sp.	mandible	cmplete (p4-m2)	L	adult (no wear)		congenital absence of p1 (p2 alveolus)	Darwent, C.M.	Haffenreffer Museum	Giddings, J. Louis	1958-61	Giddings & Anderson 1986
CK-H33-M1	NA			Brown, S.K. (VGL)	UC Davis	8/7/2012	Yes	Dog	Indeterminate	NNNNNNNNNNNNNNNNNNNNNNNNNNNNNNNNNNNNNNNNNNNNNNNNNNNNNNNNNNNNNNNNNNNNNNNNNNNNNNNNNNNNNNNNNNNNNNNNNNNNNNNNNNNNNNNNNNNNNNNNNNNNNNNNNNNNNNNNNNNNNNNNNNNNNNNNNNNNNNNNNNNNNNNNNNNNNNNNNNNNNNNNNNNNNNNNNNNNNNNNNNNNNNNNNNNNNNNNNNNNNNNNNNNNNNNNNNNNNNNNNNNNNNNNNNNNNCTTAATCACCATGCCTCGAGAAACCATNNNCAACCCTTGCTCGTANATGTCCCTCTTCTCGCTCCGGGCCCATACTANACGTGGGGGTTANTATCATGAAACTATACCTGGCATNTGGNTTCTTACTTCAGGGCCANNNTNANACT…	Yes	1.1	NA	NA	Alaska	Kotzebue Sound	Cape Krusenstern, Kotzebue Sound	49-NOA-002, House 33	AD 650 - 1150	Birnirk	Inuit	n/a	Canis sp.	mandible	complete (m2)	R	adult (no wear)		congenital absence of p1	Darwent, C.M.	Haffenreffer Museum	Giddings, J. Louis	1958-61	Giddings & Anderson 1986
CK-H33-M2	NA			Brown, S.K. (VGL)	UC Davis	8/7/2012	Yes	Dog	Indeterminate	ATGTACGTCGTGCATTAATGGTTTGCCCCATGCATATAAGCATGTACATAATATTATATCCTTACATAGGACATATTAACTCAATCTCATAGTTCACTGATCTACCAACAGTAATCGAATGCATATCACTTAGTCCAATAAGGGCTTAATCACCATGCCTCGAGAAACCATCAACCCTTGCTCGTAATGTCCCTCTTCTCGCTCCGGGCCCATACTAACGTGGGGGTTACTATCATGAAACTATACCTGGCATCTGGTTCTTACTTCAGGGCCATAACTTTATTTACTCCAATCCTACTAATTCTCGCAAATGGGACATCTCGATGGACTAATGACTAATCAGCCCATGATCACACAT	Yes	1.7	NA	NA	Alaska	Kotzebue Sound	Cape Krusenstern, Kotzebue Sound	49-NOA-002, House 33	AD 650 - 1150	Birnirk	Inuit	n/a	Canis sp.	mandible	complete (no teeth)	L	adult		congenital absence of p1	Darwent, C.M.	Haffenreffer Museum	Giddings, J. Louis	1958-61	Giddings & Anderson 1986	CK-H33-M1 and CK-H33-M2 do not match (different individuals)
CK-H35-A1	NA			Brown, S.K. (VGL)	UC Davis	7/30/2012	Yes	Fail	Fail	NA	Yes	2	NA	NA	Alaska	Kotzebue Sound	Cape Krusenstern, Kotzebue Sound	49-NOA-002, House 35	AD 1430 - 1630	Kotzebue	Inuit	n/a	Canis sp.	atlas	complete	n/a	adult		n/a	Darwent, C.M.	Haffenreffer Museum	Giddings, J. Louis	1958-61	Anderson & Freeburg 2013; Giddings & Anderson 1986
CK-H37-M1	NA			Brown, S.K. (VGL)	UC Davis	7/30/2012	Yes	Dog	A2a	NNNNNNNNNNNNNNNNNNNNNNNNNNNNNNNNNNNNNNNNNNNNNNNNNNNNNNNNNNNNNNNNNNNNNNNNNNNNNNNNNNNNNNNNNNNNNNNNNNCCCTCCCCNTATGTACGTCGTGCATTAATGGTTTGCCCCATGCATATAAGCATGTACATAATATTATATCCTTACATAGGANCATATTAACTCAATCTCATAGTTCACTGATCTATCAACAGTAATCGAATGCATATCACTTAGTCCAATAAGGGCTTAATCACCATGCCTCGAGAAACCATNNNCAACCCTTGCTCGTANATGTCCCTCTTCTCGCTCCGGGCCCATACTANACGTGGGGGTTACTATCATGAAACTATACCTGGCATCTGGNTTCTTACTTCAGGGCCANNNTNANACT…	No	NA	NA	NA	Alaska	Kotzebue Sound	Cape Krusenstern, Kotzebue Sound	49-NOA-002, House 37	AD 390 - 780	Ipiutak	Paleo-Inuit	n/a	Canis sp.	mandible	body fragment (p4-m2)	R+L	adult (moderate wear)		n/a	Darwent, C.M.	Haffenreffer Museum	Giddings, J. Louis	1958-61	Anderson & Freeburg 2013; Giddings & Anderson 1986
CK-H4-M1	NA			Brown, S.K. (VGL)	UC Davis	7/30/2012	Yes	Dog	Fail	NA	Yes	1.3	NA	NA	Alaska	Kotzebue Sound	Cape Krusenstern, Kotzebue Sound	49-NOA-002, House 4	AD 1000 - 1250	early Thule	Inuit	n/a	Canis sp.	mandible	complete (p2, m1-2)	R	adult (no wear)		congenital absence of p1; does not fit to L; teeth chipped post-mortem	Darwent, C.M.	Haffenreffer Museum	Giddings, J. Louis	1958-61	Anderson & Freeburg 2013; Giddings & Anderson 1986
CK-H4-M2	NA			Brown, S.K. (VGL)	UC Davis	7/30/2012	Yes	Dog	A2b	NNNNNNNNNNNNNNNNNNNNNNNNNNNNNNNNNNNNNNNNNNNNNNNNNNAATCACCCCTACTGTGCTATGTCAGTATCTCCAGGTAAACCCTTCTCNCCCTCCCCNTATGTACGTCGTGCATTAATGGTTTGCCCCATGCATATAAGCATGTACATAATATTATATCCTTACATAGGANCATATTAACTCAATCTCATAGTTCACTGATCTATCAACAGTAATCGAATGCATATCACTTAGTCCAATAAGGGCTTAATCACCATGCCTCGAGAAACCATNNNCAACCCTTGCTCGTANATGTCCCTCTTCTCGCTCCGGGCCCATACTANACGTGGGGGTTACTATCATGAAACTATACCTGGCATCTGGNTTCTTACTTCAGGGCCANNNTNANACT…	Yes	5.1	A2b	NA	Alaska	Kotzebue Sound	Cape Krusenstern, Kotzebue Sound	49-NOA-002, House 4	AD 1000 - 1250	early Thule	Inuit	n/a	Canis sp.	mandible	complete (c, p2, p4-m2)	L	adult (no wear)		congenital absence of p1; does not fit to R; teeth chipped post-mortem	Darwent, C.M.	Haffenreffer Museum	Giddings, J. Louis	1958-61	Anderson & Freeburg 2013; Giddings & Anderson 1986
CK-H4-M3	NA			Brown, S.K. (VGL)	UC Davis	7/30/2012	No	Fail	Fail	NA	No	NA	NA	NA	Alaska	Kotzebue Sound	Cape Krusenstern, Kotzebue Sound	49-NOA-002, House 4	AD 1000 - 1250	early Thule	Inuit	n/a	Canis sp.	mandible	body fragments (R: no teeth; L: m1)	R+L	adult		p1 alveoleus missing; R p2 absent with alveolar resorption; crown broken post mortem	Darwent, C.M.	Haffenreffer Museum	Giddings, J. Louis	1958-61	Anderson & Freeburg 2013; Giddings & Anderson 1986
CK-H4-M4	NA			Brown, S.K. (VGL)	UC Davis	7/30/2012	Yes	Dog	A2a	NNNNNNNNNNNNNNNNNNNNNNNNNNNNNNNNNNNNNNNNNNNNNNNNNNNNNNNNNNNNNNNNNNNNNNNNNNNNNNNNNNNNNNNNNNNNNNNNNNNNNNNNNNNNNNNNNNNNNNNNNNNNNNNNNNNNNNNNNNNNNNNNNNNNNNNNNNNNNNNNNNNNNNNNNNNNNNNNNNNNNNNNNNNNNNNNNNNNNNNNNNNNNNNNNNCTACCAANAGTAATCGAATGCATATCACTTAGTCCAATAAGGGCTTAATCACCATGCCTCGAGAAACCATNNNCAACCCTTGCTCGTANATGTCCCTCTTCTCGCTCCGGGCCCATACTANACGTGGGGGTTACTATCATGAAACTATACCTGGCATCTGGNTTCTTACTTCAGGGCCANNNTNANACT…	Yes	2.4	NA	NA	Alaska	Kotzebue Sound	Cape Krusenstern, Kotzebue Sound	49-NOA-002, House 4	AD 1000 - 1250	early Thule	Inuit	n/a	Canis sp.	mandible	distal 1/2 body + ascending ramus (m1-2)	R	adult (no wear)		carnivore gnawed at mid-body; teeth chipped post-mortem	Darwent, C.M.	Haffenreffer Museum	Giddings, J. Louis	1958-61	Anderson & Freeburg 2013; Giddings & Anderson 1986
CK-H4-M5	NA			Brown, S.K. (VGL)	UC Davis	7/30/2012	Yes	Dog	Fail	NA	Yes	1.8	NA	NA	Alaska	Kotzebue Sound	Cape Krusenstern, Kotzebue Sound	49-NOA-002, House 4	AD 1000 - 1250	early Thule	Inuit	n/a	Canis sp.	mandible	distal 1/2 body + ascending ramus (m1-2)	R	adult (no wear)		teeth chipped post-mortem	Darwent, C.M.	Haffenreffer Museum	Giddings, J. Louis	1958-61	Anderson & Freeburg 2013; Giddings & Anderson 1986
CK-H4-M6	NA			Brown, S.K. (VGL)	UC Davis	7/30/2012	Yes	Dog	Fail	NA	Yes	1.4	NA	NA	Alaska	Kotzebue Sound	Cape Krusenstern, Kotzebue Sound	49-NOA-002, House 4	AD 1000 - 1250	early Thule	Inuit	n/a	Canis sp.	mandible	complete (no teeth)	L	subadult?		congenital absence of P1; m3 crypt in ascending ramus	Darwent, C.M.	Haffenreffer Museum	Giddings, J. Louis	1958-61	Anderson & Freeburg 2013; Giddings & Anderson 1986
CK-H40-C1	NA			Brown, S.K. (VGL)	UC Davis	7/31/2012	No	Fail	Fail	NA	No	NA	NA	NA	Alaska	Kotzebue Sound	Cape Krusenstern, Kotzebue Sound	49-NOA-002, House 40	AD 390 - 780	Ipiutak	Paleo-Inuit	n/a	Canis sp.	cranium	maxilla + cranial vault (R: P4-M1; L: P4-M1)	n/a	adult		n/a	Darwent, C.M.	Haffenreffer Museum	Giddings, J. Louis	1958-61	Anderson & Freeburg 2013; Giddings & Anderson 1986
CK-H40-C2	NA			Brown, S.K. (VGL)	UC Davis	7/31/2012	No	Fail	Fail	NA	No	NA	NA	NA	Alaska	Kotzebue Sound	Cape Krusenstern, Kotzebue Sound	49-NOA-002, House 40	AD 390 - 780	Ipiutak	Paleo-Inuit	n/a	Canis sp.	cranium	maxilla (L: P4, M2)	n/a	adult		crowns broken	Darwent, C.M.	Haffenreffer Museum	Giddings, J. Louis	1958-61	Anderson & Freeburg 2013; Giddings & Anderson 1986
CK-H5/7-M1	NA			Brown, S.K. (VGL)	UC Davis	8/7/2012	Yes	Fail	Fail	NA	No	NA	NA	NA	Alaska	Kotzebue Sound	Cape Krusenstern, Kotzebue Sound	49-NOA-002, House 5/7	AD 1000 - 1250	early Thule	Inuit	n/a	Canis sp.	mandible	complete (R: p2, p4; L: p4)	R+L	adult (moderate wear)		congenital absence of P1	Darwent, C.M.	Haffenreffer Museum	Giddings, J. Louis	1958-61	Anderson & Freeburg 2013; Giddings & Anderson 1986
CK-H5/7-M2	NA			Brown, S.K. (VGL)	UC Davis	8/7/2012	Yes	Wolf	MG818347.1	GCTGARATTCTTCTTAAACTATTCCCTGACACCCCTACATTCATATATTGAATCACCNNNNNNNNNNNNNNNNNNNNNNNNNNNNNAAACCCTTCTCNCCCTCCCCNTATGTACGTCGTGCATTAATGGTTTGCCCCATGCATATAAGCATGTACATAATATTATATCCTTACATAGGANCATATTAACTCAATCTCATAGTTCACTGATCTACCAACAGTAATCGAATGCATATCACTTAGTCCAATAAGGGCTTAATCACCATGCCTCGAGAAACCATNNNCAACCCTTGCTCGTANATGTCCCTCTTCTCGCTCCGGGCCCATACTANACGTGGGGGTTACTATCATGAAACTATACCTGGCATCTGGNTTCTTACCTCAGGGCCANNNTNANACT…	Yes	6.6	WOLF	NA	Alaska	Kotzebue Sound	Cape Krusenstern, Kotzebue Sound	49-NOA-002, House 5/7	AD 1000 - 1250	early Thule	Inuit	n/a	Canis sp.	mandible	complete (m2)	R	adult (slight wear)		congenital absence of P1	Darwent, C.M.	Haffenreffer Museum	Giddings, J. Louis	1958-61	Anderson & Freeburg 2013; Giddings & Anderson 1986
CK-H50-M1	NA			Brown, S.K. (VGL)	UC Davis	7/30/2012	No	Fail	Fail	NA	No	NA	NA	NA	Alaska	Kotzebue Sound	Cape Krusenstern, Kotzebue Sound	49-NOA-002, House 50	AD 1430 - 1630	Kotzebue	Inuit	n/a	Canis sp.	mandible	complete (c, p2-m2)	L	old adult (heavy wear)		congenital absence of P1; canine broken and worn	Darwent, C.M.	Haffenreffer Museum	Giddings, J. Louis	1958-61	Anderson & Freeburg 2013; Giddings & Anderson 1986
CK-H6-M1	NA			Brown, S.K. (VGL)	UC Davis	7/17/2012	Yes	Dog	A2b	NNNNNNNNNNNNNNNNNNNNNNNNNNNNNNNNNNNNNNNNNNNNNNNNNNNNNNNNNNNNNNNNNNNNNNNNNNNNNNNNNNNNNNNNNNNNNNNNNNNNNNNNNCNTATGTACGTCGTGCATTAATGGTTTGCCCCATGCATATAAGCATGTACATAATATTATATCCTTACATAGGANCATATTAACTCAATCTCATAGTTCACTGATCTATCAACAGTAACCGAATGCATATCACTTAGTCCAATAAGGGCTTAATCACCATGCCTCGAGAAACCATNNNCAACCCTTGCTCGTANATGTCCCTCTTCTCGCTCCGGGCCCATACTANACGTGGGGGTTACTATCATGAAACTATACCTGGCATCTGGNTTCTTACTTCAGGGCCANNNTNANACT…	Yes	1.5	NA	NA	Alaska	Kotzebue Sound	Cape Krusenstern, Kotzebue Sound	49-NOA-002, House 6	AD 1000 - 1250	early Thule	Inuit	n/a	Canis sp.	mandible	complete R: m1; L: p4)	R+L	adult (no wear)		congenital absence of P1	Darwent, C.M.	Haffenreffer Museum	Giddings, J. Louis	1958-61	Anderson & Freeburg 2013; Giddings & Anderson 1986
CK-H6-M10	NA			Brown, S.K. (VGL)	UC Davis	7/17/2012	Yes	Dog	A2b	CCCTCCCCTATGTACGTCGTGCATTAATGGTTGCCCCATGCATATAAGCATGTACATAATATTATATCCTTACATAGGACATATTAACTCAATCTCATAGTCATTGATCTRTCAACAGTAATCGAATGCATATCACTTAGTCCAATAAGGGCTTAATCACCATGCCTCG	Yes	3	NA	NA	Alaska	Kotzebue Sound	Cape Krusenstern, Kotzebue Sound	49-NOA-002, House 6	AD 1000 - 1250	early Thule	Inuit	n/a	Canis sp.	mandible	body (p4-m2)	L	adult (no wear)		teeth chipped post-mortem	Darwent, C.M.	Haffenreffer Museum	Giddings, J. Louis	1958-61	Anderson & Freeburg 2013; Giddings & Anderson 1986
CK-H6-M2	NA			Brown, S.K. (VGL)	UC Davis	7/17/2012	Yes	Dog	Fail	NA	Yes	1.3	NA	NA	Alaska	Kotzebue Sound	Cape Krusenstern, Kotzebue Sound	49-NOA-002, House 6	AD 1000 - 1250	early Thule	Inuit	n/a	Canis sp.	mandible	complete (R: m2); body (L: m1-2)	R+L	subadult?		congenital absence of P1; m3 crypt in ascending ramus	Darwent, C.M.	Haffenreffer Museum	Giddings, J. Louis	1958-61	Anderson & Freeburg 2013; Giddings & Anderson 1986
CK-H6-M3	NA			Brown, S.K. (VGL)	UC Davis	7/17/2012	Yes	Dog	A2a	NNNNNNNNNNNNNNNNNNNNNNNNNNNNNNNNNNNNNNNNNNNNNNNNNNNNNNNNNNNNNNNNNNNNNNNNNNNNNNNNNNNNNNNNNNNNNNNNNNNNNNCCCCNTATGTACGTCGTGCATTAATGGTTTGCCCCATGCATATAAGCATGTACATAATATTATATCCTTACATAGGANCATATTAACTCAATCTCATAGTTCACTGATCTACCAACAGTAATCGAATGCATATCACTTAGTCCAATAAGGGCTTAATCACCATGCCTCGAGAAACCATNNNCAACCCTTGCTCGTANATGTCCCTCTTCTCGCTCCGGGCCCATACTANACGTGGGGGTTACTATCATGAAACTATACCTGGCATCTGGNTTCTTACTTCAGGGCCANNNTNANACT…	No	NA	NA	NA	Alaska	Kotzebue Sound	Cape Krusenstern, Kotzebue Sound	49-NOA-002, House 6	AD 1000 - 1250	early Thule	Inuit	n/a	Canis sp.	mandible	complete (m2)	R	adult (no wear)		congenital absence of P1	Darwent, C.M.	Haffenreffer Museum	Giddings, J. Louis	1958-61	Anderson & Freeburg 2013; Giddings & Anderson 1986
CK-H6-M4	NA			Brown, S.K. (VGL)	UC Davis	7/31/2012	Yes	Dog	A2b	GCTGAGATTCTTCTTAAACTATTCCCTGACACCCCTACATTCATATATTGAATCACCCCTACTGTGCTATGTCAGTATCTCCAGGTAAACCCTTCTCNCCCTCCCCNTATGTACGTCGTGCATTAATGGTTTGCCCCATGCATATAAGCATGTACATAATATTATATCCTTACATAGGANCATATTAACTCAATCTCATAGTTCACTGATCTATCAACAGTAATCGAATGCATATCACTTAGTCCAATAAGGGCTTAATCACCATGCCTCGAGAAACCATNNNCAACCCTTGCTCGTANATGTCCCTCTTCTCGCTCCGGGCCCATACTANACGTGGGGGTTACTATCATGAAACTATACCTGGCATCTGGNTTCTTACTTCAGGGCCANNNTNANACT…	Yes	4	NA	NA	Alaska	Kotzebue Sound	Cape Krusenstern, Kotzebue Sound	49-NOA-002, House 6	AD 1000 - 1250	early Thule	Inuit	n/a	Canis sp.	mandible	complete (p2-m2)	R	adult (slight wear)		congenital absence of P1; teeth chipped post-mortem	Darwent, C.M.	Haffenreffer Museum	Giddings, J. Louis	1958-61	Anderson & Freeburg 2013; Giddings & Anderson 1986
CK-H6-M5	NA			Brown, S.K. (VGL)	UC Davis	7/31/2012	Yes	Dog	Fail	NA	Yes	6.7	A2b	NA	Alaska	Kotzebue Sound	Cape Krusenstern, Kotzebue Sound	49-NOA-002, House 6	AD 1000 - 1250	early Thule	Inuit	n/a	Canis sp.	mandible	complete (p2, p4-m2)	R	adult (slight wear)		congenital absence of P1; teeth chipped post-mortem	Darwent, C.M.	Haffenreffer Museum	Giddings, J. Louis	1958-61	Anderson & Freeburg 2013; Giddings & Anderson 1986
CK-H6-M6	NA			Brown, S.K. (VGL)	UC Davis	7/31/2012	Yes	Dog	A2a	NNNNNNNNNNNNNNNNNNNNNNNNNNNNNNNNNNNNNNNNNNNNNNNNNNNNNNNNNNNNNNNNNNNNNNNNNNNNNNNNNNNNNNNNNNNNNNNNNNCCCTCCCCNTATGTACGTCGTGCATTAATGGTTTGCCCCATGCATATAAGCATGTACATAATATTATATCCTTACATAGGANCATATTAACTCAATCTCATAGTTCACTGATCTATCAACAGTAATCGAATGCATATCACTTAGTCCAATAAGGGCTTAATCACCATGCCTCGAGAAACCATNNNCAACCCTTGCTCGTANATGTCCCTCTTCTCGCTCCGGGCCCATACTANACGTGGGGGTTACTATCATGAAACTATACCTGGCATCTGGNTTCTTACTTCAGGGCCANNNTNANACT…	No	NA	NA	NA	Alaska	Kotzebue Sound	Cape Krusenstern, Kotzebue Sound	49-NOA-002, House 6	AD 1000 - 1250	early Thule	Inuit	n/a	Canis sp.	mandible	complete (no teeth)	L	subadult?		p1 alveolus present; m3 crypt in ascending ramus	Darwent, C.M.	Haffenreffer Museum	Giddings, J. Louis	1958-61	Anderson & Freeburg 2013; Giddings & Anderson 1986
CK-H6-M7	NA			Brown, S.K. (VGL)	UC Davis	7/31/2012	Yes	Dog	A2a	NNNNNNNNNNNNNNNNNNNNNNNNNNNNNNNNNNNNNNNNNNNNNNNNNNNNNNNNNNNNNNNNNNNNNNNNNNNNNNNNNNNNNNNNNNNNNNNNNNCCCTCCCCNTATGTACGTCGTGCATTAATGGTTTGCCCCATGCATATAAGCATGTACATAATATTATATCCTTACATAGGANCATATTAACTCAATCTCATAGTTCACTGATCTACCAACAGTAATCGAATGCATATCACTTAGTCCAATAAGGGCTTAATCACCATGCCTCGAGAAACCATNNNCAACCCTTGCTCGTANATGTCCCTCTTCTCGCTCCGGGCCCATACTANACGTGGGGGTTACTATCATGAAACTATACCTGGCATCTGGNTTCTTACTTCAGGGCCANNNTNANACT…	Yes	0.6	NA	NA	Alaska	Kotzebue Sound	Cape Krusenstern, Kotzebue Sound	49-NOA-002, House 6	AD 1000 - 1250	early Thule	Inuit	n/a	Canis sp.	mandible	complete (canine + 3 erupting premolars)	L	juvenile		congenital absence of P1; m3 crypt in ascending ramus; p3 erupting but tooth absent	Darwent, C.M.	Haffenreffer Museum	Giddings, J. Louis	1958-61	Anderson & Freeburg 2013; Giddings & Anderson 1986
CK-H6-M8	NA			Brown, S.K. (VGL)	UC Davis	7/31/2012	Yes	Fail	Fail	NA	No	NA	NA	NA	Alaska	Kotzebue Sound	Cape Krusenstern, Kotzebue Sound	49-NOA-002, House 6	AD 1000 - 1250	early Thule	Inuit	n/a	Canis sp.	mandible	body (no teeth	L	juvenile		mesial tip missing; P1 alveolus present; m3 crypt in ascending ramus	Darwent, C.M.	Haffenreffer Museum	Giddings, J. Louis	1958-61	Anderson & Freeburg 2013; Giddings & Anderson 1986
CK-H6-M9	NA			Brown, S.K. (VGL)	UC Davis	7/31/2012	Yes	Dog	A1b	NNNNNNNNNNNNNNNNNNNNNNNNNNNNNNNNNNNNNNNNNNNNNNNNNNNNNNNNNNNNNNNNNNNNNNNNNNNNNNNNNNNNNNNNNNNNNNNNNNNNNNNNNNNNNNNNNNNNNNNNNNNNNNNNNNNNNNNNNNNNNNNNNNNNNNNNNNNNNNNNNNNNNNNNNNNNNNNNNNNNNNNNNNNNNNNNNNNNNNNNNNNNNNTGAGCTATCGACAGTAATCGAATGCATATCACTTAGTCCAATAAGGGCTTAATCACCATGCCTCGAGAAACCATNNNCAACCCTTGCTCGTANATGTCCCTCTTCTCGCTCCGGGCCCATACTANACGTGGGGGTTACTATCATGAAACTATACCTGGCATCTGGNTTCTTACNNNNNNNNNNNNNNNNNNNN…	Yes	0.9	NA	NA	Alaska	Kotzebue Sound	Cape Krusenstern, Kotzebue Sound	49-NOA-002, House 6	AD 1000 - 1250	early Thule	Inuit	n/a	Canis sp.	mandible	complete (p2)	L	adult?		congenital absence of P1; teeth crowded, p2 alveolus adjacent to canine	Darwent, C.M.	Haffenreffer Museum	Giddings, J. Louis	1958-61	Anderson & Freeburg 2013; Giddings & Anderson 1986
CK-H8-M1	NA			Brown, S.K. (VGL)	UC Davis	7/9/2012	Yes	Fail	Fail	NA	Yes	0	NA	NA	Alaska	Kotzebue Sound	Cape Krusenstern, Kotzebue Sound	49-NOA-002, House 8	AD 1000 - 1250	early Thule	Inuit	n/a	Canis sp.	mandible	complete (R: c, p2-3 erupting; L: p2-3 erupting, m2)	R+L	juvenile		congenital absence of P1; m3 crypt just opening	Darwent, C.M.	Haffenreffer Museum	Giddings, J. Louis	1958-61	Anderson & Freeburg 2013; Giddings & Anderson 1986
CK-H8-M10	NA			Brown, S.K. (VGL)	UC Davis	7/9/2012	Yes	Dog	Fail	NA	Yes	0.6	NA	NA	Alaska	Kotzebue Sound	Cape Krusenstern, Kotzebue Sound	49-NOA-002, House 8	AD 1000 - 1250	early Thule	Inuit	n/a	Canis sp.	mandible	complete (p2)	L	adult?		mesial tip missing; no p1 alveolus	Darwent, C.M.	Haffenreffer Museum	Giddings, J. Louis	1958-61	Anderson & Freeburg 2013; Giddings & Anderson 1986
CK-H8-M11	NA			Brown, S.K. (VGL)	UC Davis	7/9/2012	Yes	Dog	A2a	NNNNNNNNNNNNNNNNNNNNNNNNNNNNNNNNNNNNNNNNNNNNNNNNNNNNNNNNNNNNNNNNNNNNNNNNNNNNNNNNNNNNNNNNNNNNNNNNNNNNNNNNNNNNNNNNNNNNNNNNNNNNNNNNNNNNNNNNNNNNNNNNNNNNNNNNNNNNNNNNNNNNNNNNNNNNNNNNNNNNNNNNNNNNNNNNNNNNNNNNNNNCACTGATCTACCAACAGTAATCGAATGCATATCACTTAGTCCAATAAGGGCTTAATCACCATGCCTCGAGAAACCATNNNCAACCCTTGCTCGTANATGTCCCTCTTCTCGCTCCGGGCCCATACTANACGTGGGGGTTACTATCATGAAACTATACCTGGCATCTGGNTTCTTACTTCAGGGCCANNNTNANACT…	Yes	2.6	NA	NA	Alaska	Kotzebue Sound	Cape Krusenstern, Kotzebue Sound	49-NOA-002, House 8	AD 1000 - 1250	early Thule	Inuit	n/a	Canis sp.	mandible	complete (m1-2)	L	adult (slight wear)		congenital absence of P1	Darwent, C.M.	Haffenreffer Museum	Giddings, J. Louis	1958-61	Anderson & Freeburg 2013; Giddings & Anderson 1986
CK-H8-M12	NA			Brown, S.K. (VGL)	UC Davis	7/9/2012	Yes	Dog	A1b	NNNNNNNNNNNNNNNNNNNNNNNNNNNNNNNNNNNNNNNNNNNNNNNNNNNNNNNNNNNNNNNNNNNNNNNNNNNNNNNNNNNNNNNNNNNNNNNNNNCCCTCCCCNTATGTACGTCGTGCATTAATGGTTTGCCCCATGCATATAAGCATGTACATAATATTATATCCTTACATAGGANCATATTAACTCAATCTCATAGTTCACTGATCTATCAACAGTAATCAAATGCATATCACTTAGTCCAATAAGGGCTTAATCACCATGCCTCGAGAAACCATNNNCAACCCTTGCTCGTANATGTCCCTCTTCTCGCTCCGGGCCCATACTANACGTGGGGGTTACTATCATGAAACTATACCTGGCATCTGGNTTCTTACTTCAGGGCCANNNTNANACT…	Yes	4.2	NA	NA	Alaska	Kotzebue Sound	Cape Krusenstern, Kotzebue Sound	49-NOA-002, House 8	AD 1000 - 1250	early Thule	Inuit	n/a	Canis sp.	mandible	complete (p2-m2)	L	adult (moderate wear)		congenital absence of P1	Darwent, C.M.	Haffenreffer Museum	Giddings, J. Louis	1958-61	Anderson & Freeburg 2013; Giddings & Anderson 1986
CK-H8-M13	NA			Brown, S.K. (VGL)	UC Davis	7/9/2012	Yes	Wolf	AB605538.1	CTGAAATTCTTCTTAAACTATTCCCTGACACCCCTACATTCATATATTGAATCACCCCTACTGTGCTATGTCAGTATCTCCAGGTAAACCCTTCTTCCCTANNNNNNNNNNNNNNNNTCATTAATGGTTTNNNNNNNNNNNNNNNNNNNNNNNNNNNNNNNNNNNNNNNNNNNNNNNNNNNNNNNNNNNNNNNNNNNNNNNNNTGATCTATCGACAGTAATCGAATGCATATCACTTAGTCCAATAAGGGCTTAATCACCATGCCTCGAGAAACCATCAACCCTTGCTCGTAATGTCCCTCTTCTCGCTCCGGGCCCATACTAACGTGGGGGTTACTATCATGAAACTATACCTGGCATCTGGTTCTTACYTCAGGRCCATAACTTTATTTACTCCAAT…	Yes	6	WOLF	NA	Alaska	Kotzebue Sound	Cape Krusenstern, Kotzebue Sound	49-NOA-002, House 8	AD 1000 - 1250	early Thule	Inuit	n/a	Canis sp.	mandible	complete (c, p2-3, m1-2)	L	adult (slight wear)		congenital absence of P1, M3	Darwent, C.M.	Haffenreffer Museum	Giddings, J. Louis	1958-61	Anderson & Freeburg 2013; Giddings & Anderson 1986
CK-H8-M2	NA			Brown, S.K. (VGL)	UC Davis	7/9/2012	Yes	Dog	A1b	NNNNNNNNNNNNNNNNNNCTATTCCCTGACACCCCTACATTCATATATTGAATCACCCCTACTGTGCTATGTCAGTATCTCCAGGTAAACCCTTCTCNCCCTCCCCNTATGTACGTCGTGCATTAATGGTTTGCCCCATGCATATAAGCATGTACATAATATTATATCCTTACATAGGANCATATTAACTCAATCTCATAGTTCACTGATCTATCAACAGTANNNNNNNNNNNNNNNNNTAGTCCAATAAGGGCTTAATCACCATGCCTCGAGAAACCATNNNCAACCCTTGCTCGTANATGTCCCTCTTCTCGCTCCGGGCCCATACTANACGTGGGGGTTACTATCATGAAACTATACCTGGCATCTGGNTTCTTACTTCAGGGCCANNNTNANACT…	Yes	1.3	NA	NA	Alaska	Kotzebue Sound	Cape Krusenstern, Kotzebue Sound	49-NOA-002, House 8	AD 1000 - 1250	early Thule	Inuit	n/a	Canis sp.	mandible	complete (R m1; L p2-m2)	R+L	adult (slight wear)		congenital absence of P1; teeth chipped post-mortem	Darwent, C.M.	Haffenreffer Museum	Giddings, J. Louis	1958-61	Anderson & Freeburg 2013; Giddings & Anderson 1986
CK-H8-M3	NA			Brown, S.K. (VGL)	UC Davis	7/9/2012	Yes	Dog	A1b	NNNNNNNNNNNNNNNNNNNNNNNNNNNNNNNNNNNNNNNNNCATATATTGAWTSASYYMWWMTGTGCTATGTCAGTATCTCCAGGTAAACCCTTCTCNCCCTCCCCNTATGTACGTCGTGCATTAATGGTTTGCCCCATGCATATAAGCATGTACATAATATTATATCCTTACATAGGANCATATTAACTCAATCTCATAGTTCACTGATCTATCAACAGTAATCGAATGCATATCACTTAGTCCAATAAGGGCTTAATCACCATGCCTCGAGAAACCATNNNCAACCCTTGCTCGTANATGTCCCTCTTCTCGCTCCGGGCCCATACTANACGTGGGGGTTACTATCATGAAACTATACCTGGCATCTGGNTTCTTACTTCAGGGCCANNNTNANACT…	Yes	3.8	NA	NA	Alaska	Kotzebue Sound	Cape Krusenstern, Kotzebue Sound	49-NOA-002, House 8	AD 1000 - 1250	early Thule	Inuit	n/a	Canis sp.	mandible	complete (R p3, m1-2; L m2)	R+L	adult (no wear)		congenital absence of P1	Darwent, C.M.	Haffenreffer Museum	Giddings, J. Louis	1958-61	Anderson & Freeburg 2013; Giddings & Anderson 1986
CK-H8-M4	NA			Brown, S.K. (VGL)	UC Davis	8/7/2012	Yes	Dog	A1b	NNNNNNNNNNNNNNNNNNNNNNNNNNNNNNNNNNNNNNNNNNNNNNNNNNNNNNNNNNNNNNNNNNNNNNNNNNNNNNNNNNNNNNNNNNNNNNNNNNCCCTCCCCNTATGTACGTCGTGCATTAATGGTTTGCCCCATGCATATAAGCATGTACATAATATTATATCCTTACATAGGANCATATTAACTCAATCTCATAGTTCACTGATCTATCARCAGTRATCAAATGCATATCACTTAGTCCAATAAGGGCTTAATCACCATGCCTCGAGAAACCATNNNCAACCCTTGCTCGTANATGTCCCTCTTCTCGCTCCGGGCCCATACTANACGTGGGGGTTACTATCATGAAACTATACCTGGCATCTGGNTTCTTACTTCAGGGCCANNNTNANACT…	Yes	4.4	NA	NA	Alaska	Kotzebue Sound	Cape Krusenstern, Kotzebue Sound	49-NOA-002, House 8	AD 1000 - 1250	early Thule	Inuit	n/a	Canis sp.	mandible	complete (P4-M2)	R	adult (no wear)		congenital absence of P1	Darwent, C.M.	Haffenreffer Museum	Giddings, J. Louis	1958-61	Anderson & Freeburg 2013; Giddings & Anderson 1986
CK-H8-M5	NA			Brown, S.K. (VGL)	UC Davis	8/7/2012	Yes	Dog	A2b	CTGAGATTCTTCTTAAACTATTCCCTGACACCCCTACATTCATATATTGAATCACCCCTACTGTGCTATGTCAGTATCTCCAGGTAAACCCTTCTCCCCTCCCCTATGTACGTCGTGCATTAATGGTTTGCCCCATGCATATAAGCATGTACATAATATTATATCCTTACATAGGACATATTAACTCAATCTCATAGTTCACTGATCTATCAACAGTAATCGAATGCATATCACTTAGTCCAATAAGGGCTTAATCACCATGCCTCGAGAAACCATCAACCCTTGCTCGTAATGTCCCTCTTCTCGCTCCGGGCCCATACTAACGTGGGGGTTACTATCATGAAACTATACCTGGCATCTGGTTCTTACTTCAGGGCCATAACTTTATTTACTCCAATC…	Yes	5.6	NA	NA	Alaska	Kotzebue Sound	Cape Krusenstern, Kotzebue Sound	49-NOA-002, House 8	AD 1000 - 1250	early Thule	Inuit	n/a	Canis sp.	mandible	complete (c, p2, p4-m2)	R	adult (no wear)		congenital absence of P1	Darwent, C.M.	Haffenreffer Museum	Giddings, J. Louis	1958-61	Anderson & Freeburg 2013; Giddings & Anderson 1986
CK-H8-M6	NA			Brown, S.K. (VGL)	UC Davis	8/7/2012	Yes	Dog	A2a	NNNNNNNNNNNNNNNNNNNNNNNNNNNNNNNNNNNNNNNNNNNNNNNNNNNNNNNNNNNNNNNNNNNNNNNNNNNNNNNNNNNNNNNNNNNNNNNNNNCCCTCCCCNTATGTACGTCGTGCATTAATGGTTTGCCCCATGCATATAAGCATGTACATAATATTATATCCTTACATAGGANCATATTAACTCAATCTCATAGTTCACTGATCTATCAACAGTAATCGAATGCATATCACTTAGTCCAATAAGGGCTTAATCACCATGCCTCGAGAAACCATNNNCAACCCTTGCTCGTANATGTCCCTCTTCTCGCTCCGGGCCCATACTANACGTGGGGGTTACTATCATGAAACTATACCTGGCATCTGGNTTCTTACTTCAGGGCCANNNTNANACT…	Yes	3	NA	NA	Alaska	Kotzebue Sound	Cape Krusenstern, Kotzebue Sound	49-NOA-002, House 8	AD 1000 - 1250	early Thule	Inuit	n/a	Canis sp.	mandible	complete (p2-m2)	R	adult (no wear)		congenital absence of P1	Darwent, C.M.	Haffenreffer Museum	Giddings, J. Louis	1958-61	Anderson & Freeburg 2013; Giddings & Anderson 1986
CK-H8-M7	NA			Brown, S.K. (VGL)	UC Davis	8/7/2012	Yes	Dog	A1b	CTGAGATTCTTCTTAAACTATTCCCTGACACCCCTACATTCATATATTGAATCACCCCTACTGTGCTATGTCAGTATCTCCAGGTAAACCCTTCTCCCCTCCCCTATGTACGTCGTGCATTAATGGTTTGCCCCATGCATATAAGCATGTACATAATATTATATCCTTACATAGGACATATTAACTCAATCTCATAGTTCACTGATCTATCAACAGTAATCAAATGCATATCACTTAGTCCAATAAGGGCTTAATCACCATGCCTCGAGAAACCATCAACCCTTGCTCGTAATGTCCCTCTTCTCGCTCCGGGCCCATACTAACGTGGGGGTTACTATCATGAAACTATACCTGGCATCTGGTTCTTACTTCAGGGCCATAACTTTATTTACTCCAATC…	Yes	13.6	A1b	NA	Alaska	Kotzebue Sound	Cape Krusenstern, Kotzebue Sound	49-NOA-002, House 8	AD 1000 - 1250	early Thule	Inuit	n/a	Canis sp.	mandible	complete (p2-m2)	L	adult (moderate wear)		congenital absence of P1	Darwent, C.M.	Haffenreffer Museum	Giddings, J. Louis	1958-61	Anderson & Freeburg 2013; Giddings & Anderson 1986
CK-H8-M8	NA			Brown, S.K. (VGL)	UC Davis	7/9/2012	Yes	Dog	Fail	NA	Yes	1.2	NA	NA	Alaska	Kotzebue Sound	Cape Krusenstern, Kotzebue Sound	49-NOA-002, House 8	AD 1000 - 1250	early Thule	Inuit	n/a	Canis sp.	mandible	complete (p3-m1)	L	adult (moderate wear)		congenital absence of P1 + m3; p2 alveolus resorbed	Darwent, C.M.	Haffenreffer Museum	Giddings, J. Louis	1958-61	Anderson & Freeburg 2013; Giddings & Anderson 1986
CK-H8-M9	NA			Brown, S.K. (VGL)	UC Davis	7/9/2012	Yes	Dog	A1b	GCTGAGATTCTTCTTAAACTATTCCCTGACACCCCTACATTCATATATTGAATCACCCCTACTGTGCTATGTCAGTATCTCCAGGTAAACCCTTCTCNCCCTCCCCNTATGTACGTCGTGCATTAATGGTTTGCCCCATGCATATAAGCATGTACATAATATTATATCCTTACATAGGANCATATTAACTCAATCTCATAGTTCACTGATCTATCAACAGTAATCAAATGCATATCACTTAGTCCAATAAGGGCTTAATCACCATGCCTCGAGAAACCATNNNCAACCCTTGCTCGTANATGTCCCTCTTCTCGCTCCGGGCCCATACTANACGTGGGGGTTACTATCATGAAACTATACCTGGCATCTGGNTTCTTACTTCAGGGCCANNNTNANACT…	Yes	2.8	NA	NA	Alaska	Kotzebue Sound	Cape Krusenstern, Kotzebue Sound	49-NOA-002, House 8	AD 1000 - 1250	early Thule	Inuit	n/a	Canis sp.	mandible	complete (P4-M2)	L	adult (no wear)		congenital absence of P1	Darwent, C.M.	Haffenreffer Museum	Giddings, J. Louis	1958-61	Anderson & Freeburg 2013; Giddings & Anderson 1986
CP2-1	NA			Brown, S.K. (VGL)	UC Davis	1/31/2012	No	Fail	Fail	NA	No	NA	NA	NA	Alaska	Kotzebue Sound	Choris Peninsula, Kotzebue Sound	49-SLK-007, House 2	BC 765 - 385	Choris	Paleo-Inuit	n/a	Canis sp.	humerus	complete, missing deltoid tuberosity	L	adult		n/a	Darwent, C.M.	Haffenreffer Museum	Giddings, J. Louis	1956-58	Darwent & Darwent 2016
CP2-2	NA			Brown, S.K. (VGL)	UC Davis	2/13/2013	No	Fail	Fail	NA	No	NA	NA	NA	Alaska	Kotzebue Sound	Choris Peninsula, Kotzebue Sound	49-SLK-007, House 2	BC 765 - 385	Choris	Paleo-Inuit	n/a	Canis sp.	humerus	proximal end	L	adult		n/a	Darwent, C.M.	Haffenreffer Museum	Giddings, J. Louis	1956-58	Darwent & Darwent 2016
CP2-3	NA			Brown, S.K. (VGL)	UC Davis	2/13/2013	No	Fail	Fail	NA	No	NA	NA	NA	Alaska	Kotzebue Sound	Choris Peninsula, Kotzebue Sound	49-SLK-007, House 2	BC 765 - 385	Choris	Paleo-Inuit	n/a	Canis sp.	humerus	complete	L	juvenile		prox unfused, dist fusion line	Darwent, C.M.	Haffenreffer Museum	Giddings, J. Louis	1956-58	Darwent & Darwent 2016
CP2-4	NA			Brown, S.K. (VGL)	UC Davis	2/13/2013	No	Fail	Fail	NA	No	NA	NA	NA	Alaska	Kotzebue Sound	Choris Peninsula, Kotzebue Sound	49-SLK-007, House 2	BC 765 - 385	Choris	Paleo-Inuit	n/a	Canis sp.	humerus	complete shaft, no ends	L	juvenile		fragment of deltoid tuberosity unfused	Darwent, C.M.	Haffenreffer Museum	Giddings, J. Louis	1956-58	Darwent & Darwent 2016
CP3-1	NA			Brown, S.K. (VGL)	UC Davis	2/13/2013	Yes	Dog	Indeterminate	NNNNNNNNNNNNNNNNNNNNNNNNNNNNNNNNNNNNNNNNNNNNNNNNNNNNNNNNNNNNNNNNNNNNNNNNNNNNNNNNNNNNNNNNNNNNNNNNNNCCCTCCCCNTATGTACGTCGTGCATTAATGGTTTGCCCCATGCATATAAGCATGTACATAATATTATATTCTTACATAGGANCATATCAACTCAATCTCATAATTGATTGATCTGTCAGCAGTAATCAAATGCATATCACTTAGTCCAATAAGGGCTTAATCACCATGCCTCGAGAAANNNNNNNNNNNNNNNNNNNNNNNNNNNNNNNNNNNNNNNNNNNNNNNNNNNNNNNNNNNNNNNNNNNNNNNNNNNNNNNNNNNNNNNNNNNNNNNNNNNNNNNNNNNNNNNNNNNNNNNNNNN…	Yes	0.5	NA	NA	Alaska	Kotzebue Sound	Choris Peninsula, Kotzebue Sound	49-SLK-007, House 3	BC 765 - 385	Choris	Paleo-Inuit	n/a	Canis sp.	femur	distal + 1/2 shaft	R	fused		spiral fracture at midshaft	Darwent, C.M.	Haffenreffer Museum	Giddings, J. Louis	1956-58	Darwent & Darwent 2016
CP3-2	NA			Brown, S.K. (VGL)	UC Davis	2/13/2013	No	Fail	Fail	NA	No	NA	NA	NA	Alaska	Kotzebue Sound	Choris Peninsula, Kotzebue Sound	49-SLK-007, House 3	BC 765 - 385	Choris	Paleo-Inuit	n/a	Canis sp.	femur	complete shaft, no ends	R	fused		fragment of greater tuberosity unfused	Darwent, C.M.	Haffenreffer Museum	Giddings, J. Louis	1956-58	Darwent & Darwent 2016
DRG-99-0043	NA			Brown, S.K. (VGL)	UC Davis	6/8/2014	Yes	Dog	Fail	NA	Yes	3.1	NA	NA	Alaska	Kotzebue Sound	Deering, Kotzebue Sound	49-KTZ-169	AD 720 - 970	Thule	Inuit	NLUR/P.O. LOT, pn# 10	Canis sp.	radius	complete	R	adult			Reuther, Josh	UA Museum of the North	Northern Land Use Research			FS# 19
DRG-99-0769	NA			Brown, S.K. (VGL)	UC Davis	6/8/2014	Yes	Dog	Fail	NA	Yes	1.1	NA	NA	Alaska	Kotzebue Sound	Deering, Kotzebue Sound	49-KTZ-169		Thule	Inuit	NLUR/P.O. LOT, pn# 171	Canis sp.	radius	fragments		juvenile			Reuther, Josh	UA Museum of the North	Northern Land Use Research			FS# 341
DRG-99-1196	NA			Brown, S.K. (VGL)	UC Davis	6/8/2014	No	Fail	Fail	NA	No	NA	NA	NA	Alaska	Kotzebue Sound	Deering, Kotzebue Sound	49-KTZ-169		Thule	Inuit	NLUR/P.O. LOT, pn# 321	Canis sp.	radius	complete	R	adult			Reuther, Josh	UA Museum of the North	Northern Land Use Research			FS# 518
E171-DOG-11	NA			Brown, S.K. (VGL)	UC Davis	12/15/2013	Yes	Dog	Fail	NA	Yes	1.8	NA	NA	Greenland	Aniaaq Fjord	Tasiliqulooq, Aniaaq Fjord, Eastern Settlement	Ø 171	AD 985 - 1410	Norse	Norse		Canis sp.	humerus	complete		n/a			McGovern, Thomas H.	CUNY/Zoological Museum Copenhagen				large-sized dog
E172-DOG-03	NA			Brown, S.K. (VGL)	UC Davis	12/15/2013	No	Fail	Fail	NA	No	NA	NA	NA	Greenland	Igaliku Fjord	Tatsipataa, Igaliku Fjord, Eastern Settlment	Ø 172	AD 985 - 1410	Norse	Norse		Canis sp.	sacrum	n/a		n/a			Smiarowski, Konrad/ Thomas H. McGovern	CUNY/Zoological Museum Copenhagen	Smiarowski, Konrad			large-sized dog
E172-DOG-07	NA			Brown, S.K. (VGL)	UC Davis	5/29/2014	No	Fail	Fail	NA	No	NA	NA	NA	Greenland	Igaliku Fjord	Tatsipataa, Igaliku Fjord, Eastern Settlment	Ø 172	AD 985 - 1410	Norse	Norse		Canis sp.	sacrum	n/a		n/a			Smiarowski, Konrad/ Thomas H. McGovern	CUNY/Zoological Museum Copenhagen	Smiarowski, Konrad			small-sized dog
E172-DOG-12	NA			Brown, S.K. (VGL)	UC Davis	12/15/2013	Yes	Dog	Fail	NA	Yes	1.9	NA	NA	Greenland	Igaliku Fjord	Tatsipataa, Igaliku Fjord, Eastern Settlment	Ø 172	AD 985 - 1410	Norse	Norse		Canis sp.	tibia	proximal end		n/a			Smiarowski, Konrad/ Thomas H. McGovern	CUNY/Zoological Museum Copenhagen	Smiarowski, Konrad			large-sized dog
E47-DOG-36	NA			Brown, S.K. (VGL)	UC Davis	5/29/2014	Yes	Dog	Fail	NA	Yes	0.5	NA	NA	Greenland	Igaliku	Gardar, Igaliku, Eastern Settlement	Ø 047	AD 985 - 1410	Norse	Norse		Canis sp.	astragalus	n/a		n/a			McGovern, Thomas H.	CUNY/Zoological Museum Copenhagen				large-sized dog; associated metapodials are very long
E47-DOG-505-4	NA			Brown, S.K. (VGL)	UC Davis	12/15/2013	Yes	Dog	Fail	NA	Yes	1.2	NA	NA	Greenland	Igaliku	Gardar, Igaliku, Eastern Settlment	Ø 047	AD 985 - 1410	Norse	Norse		Canis sp.	tibia	distal end		n/a			McGovern, Thomas H.	CUNY/Zoological Museum Copenhagen				large-sized dog
GÁS-DOG-101	NA			Brown, S.K. (VGL)	UC Davis	12/15/2013	No	Fail	Fail	NA	No	NA	NA	NA	Iceland	Eyjafjörður	Gásir, Eyjafjörður	n/a		Medieval	Other		Canis sp.	humerus	n/a		adult			Harrison, Ramona/ Thomas H. McGovern	CUNY/Zoological Museum Copenhagen	Harrison, Ramona		www.nabohome.org	small-sized dog (imported?)
GÁS-DOG-2349	NA			Brown, S.K. (VGL)	UC Davis	12/15/2013	No	Fail	Fail	NA	No	NA	NA	NA	Iceland	Eyjafjörður	Gásir, Eyjafjörður	n/a		Medieval	Other		Canis sp.	radius	n/a		adult			Harrison, Ramona/ Thomas H. McGovern	CUNY/Zoological Museum Copenhagen	Harrison, Ramona		www.nabohome.org	small-sized dog (imported?)
GÁS-DOG-2812	NA			Brown, S.K. (VGL)	UC Davis	5/27/2014	No	Fail	Fail	NA	No	NA	NA	NA	Iceland	Eyjafjörður	Gásir, Eyjafjörður	n/a		Medieval	Other		Canis sp.	radius	n/a		adult			Harrison, Ramona/ Thomas H. McGovern	CUNY/Zoological Museum Copenhagen	Harrison, Ramona		www.nabohome.org	small-sized dog (imported?)
GÁS-DOG-2851	NA			Brown, S.K. (VGL)	UC Davis	5/27/2014	Yes	Dog	Fail	NA	Yes	0.5	NA	NA	Iceland	Eyjafjörður	Gásir, Eyjafjörður	n/a		Medieval	Other		Canis sp.	ulna	n/a		adult			Harrison, Ramona/ Thomas H. McGovern	CUNY/Zoological Museum Copenhagen	Harrison, Ramona		www.nabohome.org	small-sized dog (imported?)
GÁS-DOG-655	NA			Brown, S.K. (VGL)	UC Davis	12/15/2013	No	Fail	Fail	NA	No	NA	NA	NA	Iceland	Eyjafjörður	Gásir, Eyjafjörður	n/a		Medieval	Other		Canis sp.	mandible	includes tooth		adult			Harrison, Ramona/ Thomas H. McGovern	CUNY/Zoological Museum Copenhagen	Harrison, Ramona		www.nabohome.org	small-sized dog (imported?)
GL	P.231a			Sinding, M-H.S.	Copenhagen/Stockholm		Yes	Dog	NA	NA	Yes	0.1	NA	NA	Canada	Labrador	Labrador		1922	Historical	Historical										National Museum of Denmark
GL1	NHMO-DMA-55366/1-P			Sinding, M-H.S.	Copenhagen		No	Dog	NA	NA	Yes	0	NA	NA	Greenland		Greenland		1911	Historical	Historical										Natural History Museum, Norway
GL2	NHMO-DMA-55369/1-P			Sinding, M-H.S.	Copenhagen		Yes	Dog	NA	NA	Yes	78	NA	NA	Greenland		Greenland		1911	Historical	Historical										Natural History Museum, Norway
Grå	Grå			Sinding, M-H.S.	Copenhagen		Yes	Dog	NA	NA	Yes	1	NA	NA	Canada	Nunavut	Gjøa Havn		1906	Historical	Historical										Museum of Cultural History, Norway
GSD_19.5	GSD_19.5			Sinding, M-H.S.	Copenhagen		Yes	Dog	NA	NA	Yes	12295.8	A1a	A1a	Greenland		Sisimiut			Modern	Modern
GSD_2.6	GSD_2.6			Sinding, M-H.S.	Copenhagen		Yes	Dog	NA	NA	Yes	17088.8	A1a	A1a	Greenland		Sisimiut			Modern	Modern
GSD_51602	GSD_51602			Sinding, M-H.S.	Copenhagen		Yes	Dog	NA	NA	Yes	7425.21	A1a	A1a	Greenland		Tasiilaq			Modern	Modern
GSD_51603	GSD_51603			Sinding, M-H.S.	Copenhagen		Yes	Dog	NA	NA	Yes	17356	A1b	A1b	Greenland		Tasiilaq			Modern	Modern
GSD_GS16	GSD_GS16			Sinding, M-H.S.	Copenhagen		Yes	Dog	NA	NA	Yes	553.061	A1a	A1a	Greenland		Ilulissat			Modern	Modern
GSD_GS31	GSD_GS31			Sinding, M-H.S.	Copenhagen		Yes	Dog	NA	NA	Yes	179.858	A1a	A1a	Greenland		Ilulissat			Modern	Modern
GSD_Mums	Mums			Sinding, M-H.S.	Copenhagen		Yes	Dog	NA	NA	Yes	292.89	A1a	A1a	Greenland		Aasiaat			Modern	Modern
GSD_Pondus	Pondus			Sinding, M-H.S.	Copenhagen		Yes	Dog	NA	NA	Yes	6065.47	A1a	A1a	Greenland		Aasiaat			Modern	Modern
GSD_Q11	GSD_Q11			Sinding, M-H.S.	Copenhagen		Yes	Dog	NA	NA	Yes	984.91	A1a	A1a	Greenland		Qaanaaq			Modern	Modern
GSD_QSON	GSD_QSON			Sinding, M-H.S.	Copenhagen		Yes	Dog	NA	NA	Yes	19213.3	A1a	A1a	Greenland		Qaanaaq			Modern	Modern
HJCL-9:01	NA			Brown, S.K. (VGL)	UC Davis	8/15/2013	Yes	Dog	Fail	NA	Yes	4.5	NA	NA	Labrador	Okak Bay	Uivak Point 1, Okak Bay	HjCl-9, House 7, Midden	AD 1700 - 1900	Historical Nunatsiavut	Historical	Unit 1S, 1W; 36 cm BS	Canis sp.	cranium	complete (PM, M, nasal sampled)		adult			Woollett, James	Laval University/ The Rooms	Kaplan, Susan K./ James Woollett	8/1993
HJCL-9:03	NA			Brown, S.K. (VGL)	UC Davis	8/15/2013	Yes	Dog	Fail	NA	Yes	1.5; 0.0	NA	NA	Labrador	Okak Bay	Uivak Point 1, Okak Bay	HjCl-9, Test Pit 5	AD 1700 - 1900	Historical Nunatsiavut	Historical	n/a	Canis sp.	cranium	complete (pm, bulla sampled)		adult			Woollett, James	Laval University/ The Rooms	Kaplan, Susan K./ James Woollett	7/1993
HJCL-9:04	NA			Brown, S.K. (VGL)	UC Davis	5/27/2014	Yes	INDET	Fail	NA	Yes	0.5	NA	NA	Labrador	Okak Bay	Uivak Point 1, Okak Bay	HjCl-9, House 7	AD 1700 - 1900	Historical Nunatsiavut	Historical	Unit 0N, 1E; no depth	Canis sp.	cranium	complete (PM4, zygomatic sampled)	L	adult			Woollett, James	Laval University/ The Rooms	Kaplan, Susan K./ James Woollett	7/1993
HJCL-9:05	NA			Brown, S.K. (VGL)	UC Davis	2/19/2013	Yes	Fail	Fail	NA	No	NA	NA	NA	Labrador	Okak Bay	Uivak Point 1, Okak Bay	HjCl-9, House 7, Midden	AD 1700 - 1900	Historical Nunatsiavut	Historical	Unit 1S, 3W; 40 cm BS	Canis sp.	mandible	complete (pm2 sampled)	R	adult			Woollett, James	Laval University/ The Rooms	Kaplan, Susan K./ James Woollett	8/1993
HJCL-9:07	NA			Brown, S.K. (VGL)	UC Davis	2/19/2013	Yes	Wolf	Alaska2 (KF661066.1)	CTGAAATTCTTCTTAAACTATTCCCTGACACCCCTACATTCATATATTGAATCACCCCTACTGTGCTATGTCAGTATCTCCAGGTAAACCCTTCTYCCCTCCCCTATGTACGTCGTGCATTAATGGTTTGCCCCATGCATATAAGCATGTACATAATATTATATCCTTACATAGGACATATTAACTCAATCTCATAATTCACTGATCTATCAGCAGTAATCAAATGCATATCACTTAGTCCAATAAGGGCTTAATCACCATGCCTCGAGAAACCATCAACCCTTGCTCGTAATGTCCCTCTTCTCGCTCCGGGCCCATACTAACGTGGGGGTTACTATCATGAAACTATACCTGGCATCTGGTTCTTACCTCAGGGCCATAACTTTATTTACTCCAATC…	Yes	14	WOLF	NA	Labrador	Okak Bay	Uivak Point 1, Okak Bay	HjCl-9, House 7, Midden	AD 1700 - 1900	Historical Nunatsiavut	Historical	Unit 2S, 2W; 35-40 cm BS	Canis sp.	cranium	complete (PM4 sampled)		adult (worn)			Woollett, James	Laval University/ The Rooms	Kaplan, Susan K./ James Woollett	8/1993
HJCL-9:09	NA			Brown, S.K. (VGL)	UC Davis	5/27/2014	Yes	INDET	Fail	NA	Yes	0.2	NA	NA	Labrador	Okak Bay	Uivak Point 1, Okak Bay	HjCl-9, House 7, Midden	AD 1700 - 1900	Historical Nunatsiavut	Historical	Unit 2S, 2W; 30-35 cm BS	Canis sp.	mandible	complete (2 incisors sampled)	L	adult			Woollett, James	Laval University/ The Rooms	Kaplan, Susan K./ James Woollett	8/1993
HJCL-9:10	NA			Brown, S.K. (VGL)	UC Davis	5/27/2014	Yes	INDET	Fail	NA	Yes	0.6	NA	NA	Labrador	Okak Bay	Uivak Point 1, Okak Bay	HjCl-9, House 7, Midden	AD 1700 - 1900	Historical Nunatsiavut	Historical	Unit 2S, 3W; SW; 10-15 cm BS	Canis sp.	mandible	complete (m1, ramus sampled)	R	adult			Woollett, James	Laval University/ The Rooms	Kaplan, Susan K./ James Woollett	8/1994
HJCL-9:13	NA			Brown, S.K. (VGL)	UC Davis	2/19/2013	Yes	Fail	Fail	NA	No	NA	NA	NA	Labrador	Okak Bay	Uivak Point 1, Okak Bay	HjCl-9, House 7, Midden	AD 1700 - 1900	Historical Nunatsiavut	Historical	Unit 2S, 3W; 50-55 cm BS	Canis sp.	mandible	complete (pm2 sampled)	L	adult			Woollett, James	Laval University/ The Rooms	Kaplan, Susan K./ James Woollett	8/1994
HJCL-9:14	NA			Brown, S.K. (VGL)	UC Davis	5/27/2014	Yes	Dog	A2a	GCTGAGATNNNNNNNNNNNNNNNNNNNNNNNNNNNNNNNNNNNNNNNNNNAATCACCCCTACTGTGCTATGTCAGTATCTCCAGGTAAACCCTTCTCNCCCTCCCCNTATGTACGTCGTGCATTAATGGTTTGCCCCATGCATATAAGCATGTACATAATATTATATCCTTACATAGGANCATATTAACTCAATCTCATAGTTCACTGATCTACCAACAGTAATCGAATGCATATCACTTAGTCCAATAAGGGCTTAATCACCATGCCTCGAGAAACCATNNNCAACCCTTGCTCGTANATGTCCCTCTTCTCGCTCCGGGCCCATACTANACGTGGGGGTTACTATCATGAAACTATACCTGGCATCTGGNTTNNNNNNNNNNNNNNNNNNNNNNNNN…	Yes	4.4	A2a	NA	Labrador	Okak Bay	Uivak Point 1, Okak Bay	HjCl-9, House 7, Midden	AD 1700 - 1900	Historical Nunatsiavut	Historical	Unit 1S, 3W; 30 cm S, 70 cm W; 45-50 cm	Canis sp.	mandible	complete (pm2 sampled)	R	adult			Woollett, James	Laval University/ The Rooms	Kaplan, Susan K./ James Woollett	8/1993
HJCL-9:18	NA			Brown, S.K. (VGL)	UC Davis	2/19/2013	Yes	Dog	A2a	NNNNNNNNNNNNNNNNNNNNNNNNNNNNNNNNNNNNNNNNNNNNNNNNNNNNNNNNNNNNNNNNNNNNNNNNNNNNNNNNNNNNNNNNNNNNNNNNNNCCCTCCCCNTATGTACGTCGTGCATTAATGGTTTGCCCCATGCATATAAGCATGTACATAATATTATATCCTTACATAGGANCATATTAACTCAATCTCATAGTTCACTGATCTACCAACAGTAATCGAATGCATATCACTTAGTCCAATAAGGGCTTAATCACCATGCCTCGAGAAACCATNNNCAACCCTTGCTCGTANATGTCCCTCTTCTCGCTCCGGGCCCATACTANACGTGGGGGTTACTATCATGAAACTATACCTGGCATCTGGNTTCTTACTTCAGGGCCANNNTNANACT…	No	NA	NA	NA	Labrador	Okak Bay	Uivak Point 1, Okak Bay	HjCl-9, House 7, Midden	AD 1700 - 1900	Historical Nunatsiavut	Historical	Unit 2S, 4W; 55-60 cm BS	Canis sp.	mandible	complete (pm3 sampled)	L	adult			Woollett, James	Laval University/ The Rooms	Kaplan, Susan K./ James Woollett	8/1994
HJCL-9:20	NA			Brown, S.K. (VGL)	UC Davis	5/27/2014	Yes	Fail	Fail	NA	No	NA	NA	NA	Labrador	Okak Bay	Uivak Point 1, Okak Bay	HjCl-9, House 7, Midden	AD 1700 - 1900	Historical Nunatsiavut	Historical	Unit 1S, 3W; 50-55 cm BS	Canis sp.	mandible	complete (pm2 sampled)	L	adult			Woollett, James	Laval University/ The Rooms	Kaplan, Susan K./ James Woollett	8/1994
HJCL-9:25	NA			Brown, S.K. (VGL)	UC Davis	5/27/2014	Yes	INDET	Fail	NA	Yes	0.6	NA	NA	Labrador	Okak Bay	Uivak Point 1, Okak Bay	HjCl-9, House 7, Midden	AD 1700 - 1900	Historical Nunatsiavut	Historical	Unit 1S, 5W; 35-60 cm BS	Canis sp.	mandible	complete (m2 sampled)	L	adult			Woollett, James	Laval University/ The Rooms	Kaplan, Susan K./ James Woollett	8/1993		Radiocarbon dated 07/2011
HJCL-9:27	NA			Brown, S.K. (VGL)	UC Davis	5/27/2014	Yes	INDET	Fail	NA	Yes	0.4	NA	NA	Labrador	Okak Bay	Uivak Point 1, Okak Bay	HjCl-9, House 7, Midden	AD 1700 - 1900	Historical Nunatsiavut	Historical	Unit 2S, 4W; 5-10 cm BS	Canis sp.	mandible	complete (pm3 sampled)	L	adult			Woollett, James	Laval University/ The Rooms	Kaplan, Susan K./ James Woollett	8/1993
HST-DOG-5169	NA			Brown, S.K. (VGL)	UC Davis	12/19/2013	Yes	Fail	Fail	NA	Yes	2.3	NA	NA	Iceland	Mývatnssveit	Hofstađir, Mývatnssveit	n/a	AD 1280 - 1320	Medieval	Other	near medieval Christian cemetery	Canis sp.	tibia	complete		adult		two fragments	McGovern, Thomas H.	CUNY/ Zoological Museum Copenhagen	FSÍ/NABO	2011	www.nabohome.org	dog may have been put down during late 13th c. famine
IYAT-00192	NA			Brown, S.K. (VGL)	UC Davis	6/8/2014	Yes	Fail	Fail	NA	Yes	1.8	NA	NA	Alaska	Cape Denbigh	Iyatayet, Cape Denbigh	49-NOB-002	AD 1100 - 1400	Nukleet (Thule)	Inuit	eroding from beach eroded Nukleet deposits	Canis sp.	mandible	complete		adult			Tremayne, Andrew H.	UC Davis/ UA Museum of the North	Tremayne, Andrew	7/2013
KBP2569.045	NA			Brown, S.K. (VGL)	UC Davis	4/3/2012	Yes	Dog	Fail	NA	No	NA	NA	NA	Russia	Urup Island, Kuril Islands	Ainu Creek 1, Urup Island, Kurils	A-South	BC 780 - 230	Epi-Jomon	Paleo-Inuit	Unit B2, Level 3	Canis sp.	metapodial			adult			Etnier, Michael	University of Washington	Kuril Biocomplexity Project	2006-08	Fitzhugh 2007 (NSF Final Report)
KBP2569.170	NA			Brown, S.K. (VGL)	UC Davis	4/3/2012	Yes	Dog	Fail	NA	Yes	2.1	NA	NA	Russia	Urup Island, Kuril Islands	Ainu Creek 1, Urup Island, Kurils	A-South	BC 780 - 230	Epi-Jomon	Siberian Holocene	Unit B2, Level 3	Canis sp.	scapula	proximal		adult			Etnier, Michael	University of Washington	Kuril Biocomplexity Project	2006-08	Fitzhugh 2007 (NSF Final Report)
KBP2569.179	NA			Brown, S.K. (VGL)	UC Davis	4/3/2012	No	Fail	Fail	NA	No	NA	NA	NA	Russia	Urup Island, Kuril Islands	Ainu Creek 1, Urup Island, Kurils	A-South	BC 780 - 230	Epi-Jomon	Siberian Holocene	Unit B2, Level 3	Canis sp.	cranium	maxilla + teeth	n/a	adult			Etnier, Michael	University of Washington	Kuril Biocomplexity Project	2006-08	Fitzhugh 2007 (NSF Final Report)
KBP2569.283	NA			Brown, S.K. (VGL)	UC Davis	4/3/2012	Yes	Dog	Fail	NA	Yes	5	A2b	NA	Russia	Urup Island, Kuril Islands	Ainu Creek 1, Urup Island, Kurils	A-South	AD 985 - 1180	Okhotsk	Siberian Holocene	Test Pit 1; 125 cm BS	Canis sp.	metapodial			adult			Etnier, Michael	University of Washington	Kuril Biocomplexity Project	2006-08	Fitzhugh et al. 2016
KBP3316.216	NA			Brown, S.K. (VGL)	UC Davis	8/18/2011	Yes	Dog	A2b	GCTGAGATTCTTCTTAAACTATTCCCTGACACCCCTACATTCATATATTGAATCACCCCTACTGTGCTATGTCAGTATCTCCAGGTAAACCCTTCTCNCCCTCCCCNTATGTACGTCGTGCATTAATGGTTTGCCCCATGCATATAAGCATGTACATAATATTATATCCTTACATAGGANCATATTAACTCAATCTCATAGTTCACTGATCTATCAACAGTAATCGAATGCATATCACTTAGTCCAATAAGGGCTTAATCACCATGCCTCGAGAAACCATNNNCAACCCTTGCTCGTANATGTCCCTCTTCTCGCTCCGGGCCCATACTANACGTGGGGGTTACTATCATGAAACTATACCTGGCATCTGGNTTCTTACTTCAGGGCCANNNTNANACT…	Yes	18.7	A2b	A1b	Russia	Makanrushi Island, Kuril Islands	Bukhta Zakat, Makanrushi Island, Kurils	C-North Central	AD 1030 - 1190	Okhotsk	Siberian Holocene	Test Pit 1; Level 4	Canidae	pelvis	acetabulum	R	adult			Etnier, Michael	University of Washington	Kuril Biocomplexity Project	2006-08	Fitzhugh et al. 2016
KBP3316.228	NA			Brown, S.K. (VGL)	UC Davis	9/6/2011	Yes	Dog	A1b	GCTGAGATTCTTCTTAAACTATTCCCTGACACCCCTACATTCATATATTGAATCACCCCTACTGTGCTATGTCAGTATCTCCAGGTAAACCCTTCTCNCCCTCCCCNTATGTACGTCGTGCATTAATGGTTTGCCCCATGCATATAAGCATGTACATAATATTATATCCTTACATAGGANCATATTAACTCAATCTCATAGTTCACTGATCTATCAACAGTAATCAAATGCATATCACTTAGTCCAATAAGGGCTTAATCACCATGCCTCGAGAAACCATNNNCAACCCTTGCTCGTANATGTCCCTCTTCTCGCTCCGGGCCCATACTANACGTGGGGGTTACTATCATGAAACTATACCTGGCATCTGGNTTCTTACTTCAGGGCCANNNTNANACT…	Yes	3.7	A1b	NA	Russia	Makanrushi Island, Kuril Islands	Bukhta Zakat, Makanrushi Island, Kurils	C-North Central	AD 1030 - 1190	Okhotsk	Siberian Holocene	Test Pit 1; Level 4	Canidae	scapula	body	R	adult			Etnier, Michael	University of Washington	Kuril Biocomplexity Project	2006-08	Fitzhugh et al. 2016
KBP3316.229	NA			Brown, S.K. (VGL)	UC Davis	8/18/2011	Yes	Dog	A2b	GCATGTACATAATATTATATCCTTACATAGGACATATTAACTCAATCTCATAGTTCACTGATCTATCAACAGTAATCAAATGCATATCACTTAGTCCAATAAGGGCTTAATCACCATGCCTCGAGAAACCATCAACCCTTGCTCGTAATGTCCCTCTTCTCGCTCCGGGCCCATACTAACGTGGGGGTTACTATCATGAAACTATACCTGGCATCTGGTTCTTACTTCAGGGCCATAACTTTATTTACTCCAATCCTACTAATTCTCGCAAATGGGACATCTCGATGGACTAATGACTAATCAGCCCATGATCACA	Yes	8.4	A2b	NA	Russia	Makanrushi Island, Kuril Islands	Bukhta Zakat, Makanrushi Island, Kurils	C-North Central	AD 1030 - 1190	Okhotsk	Siberian Holocene	Test Pit 1; Level 4	Canis sp.	metacarpal 5	complete	L	adult			Etnier, Michael	University of Washington	Kuril Biocomplexity Project	2006-08	Fitzhugh et al. 2016
KBP3674.045	NA			Brown, S.K. (VGL)	UC Davis	8/29/2011	Yes	Dog	Indeterminate	GCTGARATTCTTCTTAAACTATTCCCTGACACCCCTACATTCATATATTNNNNNNNNNNNNNNNNNNNNNNNNNNNNNNNNNNNNNNNNNNNNNNNNNCCCTCCCCNTATGTACGTCGTGCATTAATGGTTTGCCCCATGCATATAAGCATGTACATAATATTATATTCTTACATAGGANCATATCAACTCAATCTCATAATTCATTGATCTGTCAGCAGTAATCAAATGCATATCACTTAGTCCAATAAGGGCTTAATCACCATGCCTCGAGAAACCATNNNCAACCCTTGCTCGTANATGTCCCTCTTCTCGCTCCGGGCCCATACTANACGTGGGGGTTACTATCATGAAACTATACCTGGCATCTGGNTTCTTACTTCAGGGCCANNNTNANACT…	Yes	4.8	NA	NA	Russia	Rasshua Island, Kuril Islands	Rasshua 1, Rasshua Island, Kurils	B-South Central	AD 980 - 1225	Okhotsk	Siberian Holocene	Test Pit 1; Level 3, midden	Canis sp.	calcaneus	complete	L	adult			Etnier, Michael	University of Washington	Kuril Biocomplexity Project	2006-08	Fitzhugh et al. 2016
KBP3695.003	NA			Brown, S.K. (VGL)	UC Davis	8/22/2011	Yes	Dog	Fail	NA	Yes	2	NA	NA	Russia	Rasshua Island, Kuril Islands	Rasshua 1, Rasshua Island, Kurils	B-South Central	AD 1055 - 1225	Okhotsk	Siberian Holocene	Test Pit 1A; Level 3	Canidae	metatarsal 4		L	adult			Etnier, Michael	University of Washington	Kuril Biocomplexity Project	2006-08	Fitzhugh et al. 2016: Table 2
KBP3700.074	NA			Brown, S.K. (VGL)	UC Davis	9/6/2011	Yes	Dog	Fail	NA	Yes	2	NA	NA	Russia	Rasshua Island, Kuril Islands	Rasshua 1, Rasshua Island, Kurils	B-South Central	AD 1030 - 1215	Okhotsk	Siberian Holocene	Test Pit 1A, Level 4 midden	Canidae	femur		L	adult			Etnier, Michael	University of Washington	Kuril Biocomplexity Project	2006-08	Fitzhugh et al. 2016
KDDQ-9	NA			Brown, S.K. (VGL)	UC Davis	2/19/2013	Yes	Dog	A2b	NNNNNNNNNNNNNNNNNNNNNNNNNNNNNNNNNNNNNNNNNNNNNNNNNNNNNNNNNNNNNNNNNNNNNNNNNNNNNNNNNNNNNNNNNNNNNNNNNNCCCTCCCCNTATGTACGTCGTGCATTAATGGTTTGCCCCATGCATATAAGCATRTACATAATATTATATCCTTACATAGGANCATATTAACTCAATCTCATAGTTCACTGATCTATCAACAGTAATCGAATGCATATCACTTAGTCCAATAAGGGCTTAATCACCATGCCTCGAGAAACCATNNNCAACCCTTGCTCGTANATGTCCCTCTTCTCGCTCCGGGCCCATACTANACGTGGGGGTTACTATCATGAAACTATACCTGGCATCTGGNTTCTTACTTCAGGGCCANNNTNANACT…	Yes	4.5	A2b	NA	Nunavut	Kimmirut (Lake Harbour), Baffin Island	Nanook, Kimmirut (Lake Harbour), Baffin Island	KdDq-9	BC 420 BC - AD 120	early Dorset	Paleo-Inuit	25L25; 8" BS	Canis sp.	cranium	maxilla + partial vault	n/a	adult		glued together (maxilla distorted); stained dark	Brown, S.K./ C.M. Darwent	Canadian Museum of History	Maxwell, Moreau S.		Cleland 1973; Maxwell 1985:201
KEDQ-2:M1	NA			Brown, S.K. (VGL)	UC Davis	8/15/2013	Yes	Dog	A2b	CTGAGATTCTTCTTAAACTATTCCCTGACACCCCTACATTCATATATTGAATCACCCCTACTGTGCTATGTCAGTATCTCCAGGTAAACCCTTCTCCCCTCCCCTATGTACGTCGTGCATTAATGGTTTGCCCCATGCATATAAGCATGTACATAATATTATATCCTTACATAGGACATATTAACTCAATCTCATAGTTCACTGATCTACCAACAGTAATCGAATGCATATCACTTAGTCCAATAAGGGCTTAATCACCATGCCTCGAGAAACCATCAACCCTTGCTCGTAATGTCCCTCTTCTCGCTCCGGGCCCATACTAACGTGGGGGTTACTATCATGAAACTATACCTGGCATCTGGTTCTTACTTCAGGGCCATAACTTTATTTACTCCAATC…	Yes	11.7	A2b	NA	Nunavut	Kimmirut (Lake Harbour), Baffin Island	Talaguak, Kimmirut (Lake Harbour), Baffin Island	KeDq-2, House 2	AD 1200 - 1300	early Thule	Inuit	n/a	Canis sp.	mandible	distal horizontal ramus + mandibular condyle	R	juvenile		p4 erupting, m3 in crypt (open)	Brown, S.K./ C.M. Darwent	Canadian Museum of History	Sabo, George		Sabo 1981	AS# 1375
KEDQ-2:P1	NA			Brown, S.K. (VGL)	UC Davis	8/15/2013	Yes	Dog	Fail	NA	Yes	1.3	NA	NA	Nunavut	Kimmirut (Lake Harbour), Baffin Island	Talaguak, Kimmirut (Lake Harbour), Baffin Island	KeDq-2, House 2	AD 1200 - 1300	early Thule	Inuit	n/a	Canis sp.	pelvis	acetabulum + ilium/ischium/pubis fragments		adult		carnivore gnawed; large muscle attachments	Brown, S.K./ C.M. Darwent	Canadian Museum of History	Sabo, George		Sabo 1981	AS# 1375
KKDO-1:2270	NA			Brown, S.K. (VGL)	UC Davis	6/8/2014	Yes	Dog	A2a	CTGAGATTCTTCTTAAACTATTCCCTGACACCCCTACATTCATATATTGAATCACCCCTACTGTGCTATGTCAGTATCTCCAGGTAAACCCTTCTCCCCTCCCCTATGTACGTCGTGCATTAATGGTTTGCCCCATGCATATAAGCATGTACATAATATTATATCCTTACATAGGACATATTAACTCAATCTCATAGTTCACTGATCTACCAACAGTAATCGAATGCATATCACTTAGTCCAATAAGGGCTTAATCACCATGCCTCGAGAAACCATCAACCCTTGCTCGTAATGTCCCTCTTCTCGCTCCGGGCCCATACTAACGTGGGGGTTACTATCATGAAACTATACCTGGCATCTGGTTCTTACTTCAGGGCCATAACTTTATTTACTCCAATC…	Yes	10.2	A2a	A2a	Nunavut	Frobisher Bay, Baffin Island	Peale Point, Frobisher Bay, Baffin Island	KkDo-1	AD 1150 - 1400	early Thule	Inuit	n/a	Canis sp.	ulna	prox end + 1/2 shaft	R	adult		dist 1/2 broken; prox end carnivore gnawed	Brown, S.K.	Canadian Museum of History	Stenton, Douglas		Stenton 1983	AS# 167, Bag# 2270
KKDO-1:2282	NA			Brown, S.K. (VGL)	UC Davis	2/24/2013	Yes	Dog	Fail	NA	Yes	2.6	NA	NA	Nunavut	Frobisher Bay, Baffin Island	Peale Point, Frobisher Bay, Baffin Island	KkDo-1	AD 1150 - 1400	early Thule	Inuit	n/a	Canis sp.	ulna	prox end + 1/2 shaft	R	juvenile?		dist 1/2 broken; prox end carnivore gnawed	Brown, S.K.	Canadian Museum of History	Stenton, Douglas		Stenton 1983	AS# 167, Bag # 2282
KKDO-1:2363	NA			Brown, S.K. (VGL)	UC Davis	2/24/2013	Yes	Dog	A2a	NNNNNNNNNNNNNNNNNNNNNNNNNNNNNNNNNNNNNNNNNNNNNNNNNNNNNNNNNNNNNNNNNNNNNNNNNNNNNNNNNNNNNNNNNNNNNNNNNNCCCTCCCCNTATGTACGTCGTGCATTAATGGTTTGCCCCATGCATATAAGCATGTACATAATATTATATCCTTACATAGGANCATATTAACTCAATCTCATAGTTCACTGATCTACCAACAGTAATCGAATGCATATCACTTAGTCCAATAAGGGCTTAATCACCATGCCTCGAGAAANNNNNNNNNNNNNNNNNNNNNNNNNNNNNNNNNNNNNNNNNNNNNNNNNNNNNNNNNNNNNNNNNNNNNNNNNNNNNNNNNNNNNNNNNNNNNNNNNNNNNNNNNNNNNNNNNNNNNNNNNNN…	Yes	0.9; 0.3	NA	NA	Nunavut	Frobisher Bay, Baffin Island	Peale Point, Frobisher Bay, Baffin Island	KkDo-1	AD 1150 - 1400	early Thule	Inuit	n/a	Canis sp.	ulna	complete shaft, no ends	R	adult		distal and proximal ends broken	Brown, S.K.	Canadian Museum of History	Stenton, Douglas		Stenton 1983	Bag# 2363
KKHH-2:357	NA			Brown, S.K. (VGL)	UC Davis	3/5/2013	Yes	Dog	A2a	NNNNNNNNNNNNNNNNNNNNNNNNNNNNNNNNNNNNNNNNNNNNNNNNNNNNNNNNNNNNNNNNNNNNNNNNNNNNNNNNNNNNNNNNNNNNNNNNNNCCCTCCCCNTATGTACGTCGTGCATTAATGGTTTGCCCCATGCATATAAGCATGTACATAATATTATATCCTTACATAGGANCATATTAACTCAATCTCATAGTTCACTGATCTACCAACAGTAATCGAATGCATATCACTTAGTCCAATAAGGGCTTAATCACCATGCCTCGAGAAACCATNNNCAACCCTTGCTCGTANATGTCCCTCTTCTCGCTCCGGGCCCATACTANACGTGGGGGTTACTATCATGAAACTATACCTGGCATCTGGNTTCTTACTTCAGGGCCANNNTNANACT…	No	NA	NA	NA	Nunavut	Southampton Island	Lake Site, Southampton Island	KhHh-2, House 2 or 5	AD 1445 - 1635	Classic Thule	Inuit	n/a	Canis sp.	mandible	complete (no teeth)		adult	F	n/a	Brown, S.K.	Canadian Museum of History	Clark, Brenda		Clark 1980	AS# 137; caribou (#361) sampled for radiocarbon dating (AA102343)
KKJG-1:H13-M1	NA			Brown, S.K. (VGL)	UC Davis	12/9/2013	Yes	Dog	Fail	NA	Yes	0.5	NA	NA	Nunavut	Chesterfield Inlet	Silumiut Island, Chesterfield Inlet	KkJg-1, House 13, midden	AD 1400 - 1650	Classic Thule	Inuit	midden, Level 3	Canis sp.	mandible	mesial 1/2 horizontal ramus (P1)		adult	?	n/a	Brown, S.K.	Canadian Museum of History			McCartney 1971; Staab 1979	caribou bone sampled for radiocarbon dating (AA1022347)
KKJG-1:H14-M1	NA			Brown, S.K. (VGL)	UC Davis	9/9/2013	Yes	Dog	Fail	NA	Yes	1.2	NA	NA	Nunavut	Chesterfield Inlet	Silumiut Island, Chesterfield Inlet	KkJg-1, House 14	AD 1400 - 1650	Classic Thule	Inuit	midden	Canis sp.	mandible	complete (p3-m1, m3 not erupted)		juvenile	M	coronoid process broken	Brown, S.K.	Canadian Museum of History			McCartney 1971; Staab 1979	AS# 293, Bag# 517
KKJG-1:H14-M2	NA			Brown, S.K. (VGL)	UC Davis	3/5/2013	Yes	WOLF?	Fail	NA	Yes	2.2	NA	NA	Nunavut	Chesterfield Inlet	Silumiut Island, Chesterfield Inlet	KkJg-1, House 14	AD 1400 - 1650	Classic Thule	Inuit	midden	Canis sp.	mandible	complete (p3, m1)		adult	?	coronoid process broken	Brown, S.K.	Canadian Museum of History			McCartney 1971; Staab 1979	AS# 293, Bag # 511
KKJG-1:H14-M3	NA			Brown, S.K. (VGL)	UC Davis	9/9/2013	Yes	Fail	Fail	NA	No	NA	NA	NA	Nunavut	Chesterfield Inlet	Silumiut Island, Chesterfield Inlet	KkJg-1, House 14	AD 1400 - 1650	Classic Thule	Inuit	midden	Canis sp.	mandible	complete (c, p2-m1)		adult	M	congenital absence of p1, canine crown broken off	Brown, S.K.	Canadian Museum of History			McCartney 1971; Staab 1979	AS# 293, Bag # 521
KKJG-1:H3-T1	NA			Brown, S.K. (VGL)	UC Davis	3/5/2013	No	Fail	Fail	NA	No	NA	NA	NA	Nunavut	Chesterfield Inlet	Silumiut Island, Chesterfield Inlet	KkJg-1, House 3	AD 1400 - 1650	Classic Thule	Inuit	midden; I sect., M15	Canis sp.	tibia	complete	L	adult		n/a	Brown, S.K.	Canadian Museum of History		1/Aug	McCartney 1971; Staab 1979	AS# 278; caribou sampled for radiocarbon dating (AA102344)
KKJG-1:H4-S1	NA			Brown, S.K. (VGL)	UC Davis	9/9/2013	Yes	INDET	Fail	NA	Yes	1.3; 3.0	NA	NA	Nunavut	Chesterfield Inlet	Silumiut Island, Chesterfield Inlet	KkJg-1, House 4	AD 1400 - 1650	Classic Thule	Inuit	Sg-S; Sod zone	Canis sp.	scapula	complete		adult		slight carnivore damage	Brown, S.K.	Canadian Museum of History	GW	28/July	McCartney 1971; Staab 1979	AS# 281; caribou bone sampled for radiocarbon dating (AA102345)
KKJG-1:H8-M1	NA			Brown, S.K. (VGL)	UC Davis	3/8/2013	Yes	Dog	A2a	GCTGAGATTCTTCTTAAACTATTCCCTGACACCCCTACATTCATATATTGAATCACCCCTACTGTGCTATGTCAGTATCTCCAGGTAAACCCTTCTCNCCCTCCCCNTATGTACGTCGTGCATTAATGGTTTGCCCCATGCATATAAGCATGTACATAATATTATATCCTTACATAGGANCATATTAACTCAATCTCATAGTTCACTGATCTACCAACAGTAATCGAATGCATATCACTTAGTCCAATAAGGGCTTAATCACCATGCCTCGAGAAACCATNNNCAACCCTTGCTCGTANATGTCCCTCTTCTCGCTCCGGGCCCATACTANACGTGGGGGTTACTATCATGAAACTATACCTGGCATCTGGNTTCTTACTTCAGGGCCANNNTNANACT…	Yes	35	A2a	A2a	Nunavut	Chesterfield Inlet	Silumiut Island, Chesterfield Inlet	KkJg-1, House 8	AD 1400 - 1650	Classic Thule	Inuit	S-D	Canis sp.	mandible	complete (m2)	R	adult	M	coronoid process broken	Brown, S.K.	Canadian Museum of History	GW	23/Aug	McCartney 1971; Staab 1979	AS# 281; caribou bone sampled for radiocarbon dating (AA102346)
KNK2643x1838	NA			Brown, S.K. (VGL)	UC Davis	3/8/2011	Yes	Dog	A2a	CTGAGATTCTTCTTAAACTATTCCCTGACACCCCTACATTCATATATTGAATCACCCCTACTGTGCTATGTCAGNNNNNNNNNNNAAACCCTTCTYCCCTCCCCTATGTACGTCGTGCATTAATGGTTTGCCCCATGCATATAAGCATGTACATAATATTATATCCTTACATAGGACATATTAACTCAATCTCATAGTTCACTGATCTAYCAACAGTAATCGAATGCATATCACTTAGTCCAATAAGGGCTTAATCACCATGCCTCGAGAAACCATCAACCCTTGCTCGTAATGTCCCTCTTCTCGCTCCGGGCCCATACTAACGTGGGGGTTACTATCATGAAACTATACCTGGCATCTGGTTCTTACTTCAGGGCCATAACTTTATTTACTCCAATC…	Yes	3.6	A2a	NA	Greenland	Foulke Fjord, Inglefield Land	Iita, Foulke Fjord, Inglefield Land	KNK2643, Feature 1 (House)	AD 1275 - 1650	early Thule	Inuit	Unit 1S/6E, Level 5 (buried under house floor)	Canis sp.	mandible	complete (deciduous premolars)	R	juvenile (2-6 mos)		n/a	Darwent, C.M./ T.B. Johansen	UC Davis/ Zoological Museum Copenhagen	LeMoine, Genevieve/ J. Darwent	7/2006	Brown et al. 2013: Table 1
KNK2643x1839	NA			Brown, S.K. (VGL)	UC Davis	3/8/2011	Yes	Dog	A2b	GCTGAGATTCTTCTTAAACTATTCCCTGACACCCCTACATTCATATATTGAATCACCCCTACTGTGCTATGTCAGNNNNNNNNNNNAAACCCTTCTYNCCCTCCCCNTATGTACGTCGTGCATTAATGGTTTGCCCCATGCATATAAGCATGTACATAATATTATATCCTTACATAGGANCATATTAACTCAATCTCATAGTTCACTGATCTACCAACAGTAATCGAATGCATATCACTTAGTCCAATAAGGGCTTAATCACCATGCCTCGAGAAACCATNNNCAACCCTTGCTCGTANATGTCCCTCTTCTCGCTCCGGGCCCATACTANACGTGGGGGTTACTATCATGAAACTATACCTGGCATCTGGNTTCTTACTTCAGGGCCANNNTNANACT…	Yes	15.1	A2b	NA	Greenland	Foulke Fjord, Inglefield Land	Iita, Foulke Fjord, Inglefield Land	KNK2643, Feature 1 (House)	AD 1900 - 1910	Historical Inughuit	Historical	Unit 9N/4E, SW quad, Level 4 (house interior)	Canis sp.	mandible	complete	R	juvenile (2-6 mos)		n/a	Darwent, C.M./ T.B. Johansen	UC Davis/ Zoological Museum Copenhagen	LeMoine, Genevieve/ J. Darwent	7/2006	Brown et al. 2013: Table 1
KNK2644x1119	NA			Brown, S.K. (VGL)	UC Davis	3/8/2011	Yes	Dog	A2b	CTGAGATTCTTCTTAAACTATTCCCTGACACCCCTACATTCATATATTGAATCACCCCTACTGTGCTATGTCAGTATCTCCAGGTAAACCCTTCTCCCCTCCCCTATGTACGTCGTGCATTAATGGTTTGCCCCATGCATATAAGCATGTACATAATATTATATCCTTACATAGGACATATTAACTCAATCTCATAGTTCACTGATCTACCAACAGTAATCGAATGCATATCACTTAGTCCAATAAGGGCTTAATCACCATGCCTCGAGAAACCATCAACCCTTGCTCGTAATGTCCCTCTTCTCGCTCCGGGCCCATACTAACGTGGGGGTTACTATCATGAAACTATACCTGGCATCTGGTTCTTACTTCAGGGCCATAACTTTATTTACTCCAATC…	Yes	20.8	A2b	NA	Greenland	Foulke Fjord, Inglefield Land	Iita, Foulke Fjord, Inglefield Land	KNK2644, Feature 2 (House)	AD 1850 - 1900	Historical Inughuit	Historical	Unit 2N/3E, SE quad, Level 3 (house interior)	Canis sp.	mandible	horizontal ramus (deciduous premolars)	L	juvenile (2-6 mos)		charred (mottled black)	Darwent, C.M./ T.B. Johansen	UC Davis/ Zoological Museum Copenhagen	LeMoine, Genevieve/ J. Darwent	7/2006	Brown et al. 2013: Table 1
KNK2644x1120	NA			Brown, S.K. (VGL)	UC Davis	3/8/2011	Yes	Dog	A2a	CTGAGATTCTTCTTAAACTATTCCCTGACACCCCTACATTCATATATTGAATCACCCCTACTGTGCTATGTCAGTATCTCCAGGTAAACCCTTCTCCCCTCCCCTATGTACGTCGTGCATTAATGGTTTGCCCCATGCATATAAGCATGTACATAATATTATATCCTTACATAGGACATATTAACTCAATCTCATAGTTCACTGATCTACCAACAGTAATCGAATGCATATCACTTAGTCCAATAAGGGCTTAATCACCATGCCTCGAGAAACCATCAACCCTTGCTCGTAATGTCCCTCTTCTCGCTCCGGGCCCATACTAACGTGGGGGTTACTATCATGAAACTATACCTGGCATCTGGTTCTTACTTCAGGGCCATAACTTTATTTACTCCAATC…	Yes	57	A2a	A2a	Greenland	Foulke Fjord, Inglefield Land	Iita, Foulke Fjord, Inglefield Land	KNK2644, Feature 2 (House)	AD 1850 - 1900	Historical Inughuit	Historical	Unit 1N/2E, SE quad, Level 6 (house interior)	Canis sp.	mandible	complete	L	old adult (heavy wear)		alveolar resorption with infection; missing p4-m1	Darwent, C.M./ T.B. Johansen	UC Davis/ Zoological Museum Copenhagen	LeMoine, Genevieve/ J. Darwent	7/2006	Brown et al. 2013: Table 1
KNK2644x1121	NA			Brown, S.K. (VGL)	UC Davis	3/8/2011	Yes	Dog	A2a	GCTGAGATTCTTCTTAAACTATTCCCTGACACCCCTACATTCATATATTGAATCACCCCTACTGTGCTATGTCAGTATCTCCAGGTAAACCCTTCTCNCCCTCCCCNTATGTACGTCGTGCATTAATGGTTTGCCCCATGCATATAAGCATGTACATAATATTATATCCTTACATAGGANCATATTAACTCAATCTCATAGTTCACTGATCTACCAACAGTAATCGAATGCATATCACTTAGTCCAATAAGGGCTTAATCACCATGCCTCGAGAAACCATNNNCAACCCTTGCTCGTANATGTCCCTCTTCTCGCTCCGGGCCCATACTANACGTGGGGGTTACTATCATGAAACTATACCTGGCATCTGGNTTCTTACTTCAGGGCCANNNTNANACT…	Yes	9.2	A2a	NA	Greenland	Foulke Fjord, Inglefield Land	Iita, Foulke Fjord, Inglefield Land	KNK2644, Feature 2 (House)	AD 1850 - 1900	Historical Inughuit	Historical	Unit 4N/3E, SW quad, Level 3 (house interior)	Canis sp.	mandible	complete	R	adult		n/a	Darwent, C.M./ T.B. Johansen	UC Davis/ Zoological Museum Copenhagen	LeMoine, Genevieve/ J. Darwent	7/2006	Brown et al. 2013: Table 1
KNK492x36a (KNK492x33)	NA			Brown, S.K. (VGL)	UC Davis	2/29/2011	Yes	Dog	A2a	GCTGAGATTCTTCTTAAACTATTCCCTGACACCCCTACATTCATATATTGAATCACCCCTACTGTGCTATGTCAGTATCTCCAGGTAAACCCTTCTCNCCCTCCCCNTATGTACGTCGTGCATTAATGGTTTGCCCCATGCATATAAGCATGTACATAATATTATATCCTTACATAGGANCATATTAACTCAATCTCATAGTTCACTGATCTACCAACAGTAATCGAATGCATATCACTTAGTCCAATAAGGGCTTAATCACCATGCCTCGAGAAACCATNNNCAACCCTTGCTCGTANATGTCCCTCTTCTCGCTCCGGGCCCATACTANACGTGGGGGTTACTATCATGAAACTATACCTGGCATCTGGNTTCTTACTTCAGGGCCANNNTNANACT…	Yes	16.5	A2a	A2a	Greenland	Paris Fjord	Qaqaitsut West, Paris Fjord	KNK492, Feature 2 (House)	AD 1275 - 1440	early Thule	Inuit	Unit 2N/3E, SE quad, Level 1 (kitchen area)	Canis sp.	mandible		R	adult (no wear)		see x36 or x37	Darwent, C.M./ T.B. Johansen	UC Davis/ Zoological Museum Copenhagen	Darwent, J.	7/2009	NOT IN 2013 PUBLICATION?	NOT IN KNK492 DATABASE (lithic debitage); paired duplicate sample (x36 or x37)
KNK492x36b	NA			Brown, S.K. (VGL)	UC Davis	2/16/2011	Yes	Dog	A2a	ATGTACGTCGTGCATTAATGGTTTGCCCCATGCATATAAGCATGTACATAATATTATATCCTTACATAGGACATATTAACTCAATCTCATAGTTCACTGATCTACCAACAGTAATCGAATGCATATCACTTAGTCCAATAAGGGCTTAATCACCATGCCTCGAGAAACCATCAACCCTTGCTCGTAATGTCCCTCTTCTCGCTCCGGGCCCATACTAACGTGGGGGTTACTATCATGAAACTATACCTGGCATCTGGTTCTTACTTCAGGGCCATAACTTTATTTACTCCAATCCTACTAATTCTCGCAAATGGGACATCTCGATGGACTAATGACTAATCAGCCCATGATCACACAT	No	NA	NA	NA	Greenland	Paris Fjord	Qaqaitsut West, Paris Fjord	KNK492, Feature 2 (House)	AD 1275 - 1440	early Thule	Inuit	Unit 2N/3E, SE quad, Level 1 (kitchen area)	Canis sp.	mandible	complete	L	adult (no wear)		fine cut marks on lateral/inferior surface; mesial surface of canine scorched	Darwent, C.M.	UC Davis/ Zoological Museum Copenhagen	Darwent, J.	7/2009	Brown et al. 2013: Table 1	paired with right mandible, horizontal ramus
KNK492x37	NA			Brown, S.K. (VGL)	UC Davis	2/16/2011	Yes	Dog	A2a	ATGTACGTCGTGCATTAATGGTTTGCCCCATGCATATAAGCATGTACATAATATTATATCCTTACATAGGACATATTAACTCAATCTCATAGTTCACTGATCTACCAACAGTAATCGAATGCATATCACTTAGTCCAATAAGGGCTTAATCACCATGCCTCGAGAAACCATCAACCCTTGCTCGTAATGTCCCTCTTCTCGCTCCGGGCCCATACTAACGTGGGGGTTACTATCATGAAACTATACCTGGCATCTGGTTCTTACTTCAGGGCCATAACTTTATTTACTCCAATCCTACTAATTCTCGCAAATGGGACATCTCGATGGACTAATGACTAATCAGCCCATGATCACACAT	No	NA	NA	NA	Greenland	Paris Fjord	Qaqaitsut West, Paris Fjord	KNK492, Feature 2 (House)	AD 1275 - 1440	early Thule	Inuit	Unit 2N/3E, SE quad, Level 1 (kitchen area)	Canis sp.	mandible	horizontal ramus	L	adult (no wear)		fine cut marks on lateral/inferior surface	Darwent, C.M.	UC Davis/ Zoological Museum Copenhagen	Darwent, J.	7/2009	Brown et al. 2013: Table 1	paired with right mandible, complete
KNK492x38	NA			Brown, S.K. (VGL)	UC Davis	2/16/2011	Yes	Dog	A2a	ATGTACGTCGTGCATTAATGGTTTGCCCCATGCATATAAGCATGTACATAATATTATATCCTTACATAGGACATATTAACTCAATCTCATAGTTCACTGATCTACCAACAGTAATCGAATGCATATCACTTAGTCCAATAAGGGCTTAATCACCATGCCTCGAGAAACCATCAACCCTTGCTCGTAATGTCCCTCTTCTCGCTCCGGGCCCATACTAACGTGGGGGTTACTATCATGAAACTATACCTGGCATCTGGTTCTTACTTCAGGGCCATAACTTTATTTACTCCAATCCTACTAATTCTCGCAAATGGGACATCTCGATGGACTAATGACTAATCAGCCCATGATCACACAT	No	NA	NA	NA	Greenland	Paris Fjord	Qaqaitsut West, Paris Fjord	KNK492, Feature 2 (House)	AD 1275 - 1440	early Thule	Inuit	Unit 2N/3E, SE quad Level 1 (kitchen area)	Canis sp.	mandible	horizontal ramus	L	adult (no wear)		ascending ramus carnivore gnawed off	Darwent, C.M.	UC Davis/ Zoological Museum Copenhagen	Darwent, J.	7/2009	Brown et al. 2013: Table 1
KNK492x39	NA			Brown, S.K. (VGL)	UC Davis	2/16/2011	No	Fail	Fail	NA	No	NA	NA	NA	Greenland	Paris Fjord	Qaqaitsut West, Paris Fjord	KNK492, Feature 2 (House)	AD 1275 - 1440	early Thule	Inuit	Unit 3N/3E, NE quad, Level 1 (kitchen area)	Canis sp.	mandible	complete	R	adult (slight wear)		heavy cut marks post/inf to mandibular condyle; carnivore gnawed; weathered	Darwent, C.M.	UC Davis/ Zoological Museum Copenhagen	Darwent, J.	7/2009	Brown et al. 2013: Table 1	does not pair with any of the left mandibles from this feature
KNK494x1b	NA			Brown, S.K. (VGL)	UC Davis	2/16/2011	Yes	Dog	A2a	ATGTACGTCGTGCATTAATGGTTTGCCCCATGCATATAAGCATGTACATAATATTATATCCTTACATAGGACATATTAACTCAATCTCATAGTTCACTGATCTACCAACAGTAATCGAATGCATATCACTTAGTCCAATAAGGGCTTAATCACCATGCCTCGAGAAACCATCAACCCTTGCTCGTAATGTCCCTCTTCTCGCTCCGGGCCCATACTAACGTGGGGGTTACTATCATGAAACTATACCTGGCATCTGGTTCTTACTTCAGGGCCATAACTTTATTTACTCCAATCCTACTAATTCTCGCAAATGGGACATCTCGATGGACTAATGACTAATCAGCCCATGATCACACAT	No	NA	NA	NA	Greenland	Paris Fjord	Qaqaitsut West, Paris Fjord	KNK492, Feature 7 (Cache)	AD 1275 - 1440	early Thule	Inuit	Unit 1N/2E, SW quad, Level 1	Canis sp.	mandible	mesial 3/4 horizontal ramus	L	adult (no wear)		cracked for marrow at gonial angle	Darwent, C.M.	UC Davis/ Zoological Museum Copenhagen	Dussault, Frederick	7/2009	Brown et al. 2013: Table 1	paired with KNK494x1a, right mandible (sample failed)
KNK494x2b	NA			Brown, S.K. (VGL)	UC Davis	2/16/2011	Yes	Dog	A2a	ATGTACGTCGTGCATTAATGGTTTGCCCCATGCATATAAGCATGTACATAATATTATATCCTTACATAGGACATATTAACTCAATCTCATAGTTCACTGATCTACCAACAGTAATCGAATGCATATCACTTAGTCCAATAAGGGCTTAATCACCATGCCTCGAGAAACCATCAACCCTTGCTCGTAATGTCCCTCTTCTCGCTCCGGGCCCATACTAACGTGGGGGTTACTATCATGAAACTATACCTGGCATCTGGTTCTTACTTCAGGGCCATAACTTTATTTACTCCAATCCTACTAATTCTCGCAAATGGGACATCTCGATGGACTAATGACTAATCAGCCCATGATCACACAT	No	NA	NA	NA	Greenland	Paris Fjord	Qaqaitsut West, Paris Fjord	KNK492, Feature 7 (Cache)	AD 1275 - 1440	early Thule	Inuit	Unit 1N/1E, NE quad, Level 1	Canis sp.	mandible	mesial 3/4 horizontal ramus	L	adult (no wear)		ascending ramus chopped off	Darwent, C.M.	UC Davis/ Zoological Museum Copenhagen	Dussault, Frederick	7/2009	Brown et al. 2013: Table 1	paired with KNK494x2a, right mandible (A31)
KNK494x3	NA			Brown, S.K. (VGL)	UC Davis	2/16/2011	Yes	Dog	A2a	ATGTACGTCGTGCATTAATGGTTTGCCCCATGCATATAAGCATGTACATAATATTATATCCTTACATAGGACATATTAACTCAATCTCATAGTTCACTGATCTACCAACAGTAATCGAATGCATATCACTTAGTCCAATAAGGGCTTAATCACCATGCCTCGAGAAACCATCAACCCTTGCTCGTAATGTCCCTCTTCTCGCTCCGGGCCCATACTAACGTGGGGGTTACTATCATGAAACTATACCTGGCATCTGGTTCTTACTTCAGGGCCATAACTTTATTTACTCCAATCCTACTAATTCTCGCAAATGGGACATCTCGATGGACTAATGACTAATCAGCCCATGATCACACAT	No	NA	NA	NA	Greenland	Paris Fjord	Qaqaitsut West, Paris Fjord	KNK492, Feature 7 (Cache)	AD 1275 - 1440	early Thule	Inuit	Unit 1N/2E, SW quad, Level 1	Canis sp.	mandible	mesial 3/4 horizontal ramus	L	adult		cracked for marrow at gonia angle (refits to ascending ramus from F. 2)	Darwent, C.M.	UC Davis/ Zoological Museum Copenhagen	Dussault, Frederick	7/2009	Brown et al. 2013: Table 1
KOTZ-10-0118A	NA			Brown, S.K. (VGL)	UC Davis	5/29/2012	Yes	Dog	A2a	ATGTACGTCGTGCATTAATGGTTTGCCCCATGCATATAAGCATGTACATAATATTATATCCTTACATAGGACATATTAACTCAATCTCATAGTTCACTGATCTACCAACAGTAATCGAATGCATATCACTTAGTCCAATAAGGGCTTAATCACCATGCCTCGAGAAACCATCAACCCTTGCTCGTAATGTCCCTCTTCTCGCTCCGGGCCCATACTAACGTGGGGGTTACTATCATGAAACTATACCTGGCATCTGGTTCTTACTTCAGGGCCATAACTTTATTTACTCCAATCCTACTAATTCTCGCAAATGGGACATCTCGATGGACTAATGACTAATCAGCCCATGATCACACAT	Yes	1.3	NA	NA	Alaska	Kotzebue Sound	Kotzebue, Kotzebue Sound	ASK JOSH	ASK JOSH	Thule	Inuit	LP 42, HP-10, entry way fill, 92-97 cm BS	Canis sp.	mandible	complete	R	adult			Reuther, Josh	UA Museum of the North	Northern Land Use Research			FS# 6-2a
KP-1	NA			Brown, S.K. (VGL)	UC Davis	6/19/2012	Yes	Dog	A2b	GCTGAGATTCTTCTTAAACTATTCCCTGACACCCCTACATTCATATATTGAATCACCCCTACTGTGCTATGTCAGTATCTCCAGGTAAACCCTTCTCNCCCTCCCCNTATGTACGTCGTGCATTAATGGTTTGCCCCATGCATATAAGCATGTACATAATATTATATCCTTACATAGGANCATATTAACTCAATCTCATAGTTCACTGATCTACCAACAGTAATCGAATGCATATCACTTAGTCCAATAAGGGCTTAATCACCATGCCTCGAGAAACCATNNNCAACCCTTGCTCGTANATGTCCCTCTTCTCGCTCCGGGCCCATACTANACGTGGGGGTTACTATCATGAAACTATACCTGGCATCTGGNTTCTTACTTCAGGGCCANNNTNANACT…	Yes	6.4	A2b	NA	Alaska	St. Lawrence Island	Kitnepaluk, St. Lawrence Island	49-XSL-010, Trench 2	AD 825 - 1190	Punuk	Inuit	n/a	Canis sp.	mandible	complete (p4)	L	adult		p2 alveolus resorbed	Brown, S.K.	UA Museum of the North	Bandi, Hans Georg	1972	Blumer 2002; Mason 2016	not accessioned; "Bandi's bones"
KP-2	NA			Brown, S.K. (VGL)	UC Davis	6/26/2012	Yes	Dog	Fail	NA	Yes	3.1	NA	NA	Alaska	St. Lawrence Island	Kitnepaluk, St. Lawrence Island	49-XSL-010, Trench 2	AD 825 - 1190	Punuk	Inuit	n/a	Canis sp.	mandible	complete (m1-m2)	L	adult		congenital absence of p1	Brown, S.K.	UA Museum of the North	Bandi, Hans Georg	1972	Blumer 2002; Mason 2016	not accessioned; "Bandi's bones"
KP-3	NA			Brown, S.K. (VGL)	UC Davis	6/26/2012	No	Fail	Fail	NA	No	NA	NA	NA	Alaska	St. Lawrence Island	Kitnepaluk, St. Lawrence Island	49-XSL-010, Trench 2	AD 825 - 1190	Punuk	Inuit	n/a	Canis sp.	mandible	complete (m1-m2)	L	adult		congenital absence of p1	Brown, S.K.	UA Museum of the North	Bandi, Hans Georg	1972	Blumer 2002; Mason 2016	not accessioned; "Bandi's bones"
KZ-7005-1	NA			Brown, S.K. (VGL)	UC Davis	7/31/2012	No	Fail	Fail	NA	No	NA	NA	NA	Alaska	Lopp Lagoon	Kugzruk Island, Lopp Lagoon	49-TEL-149, Site 2	BC 420 - 210	Norton	Paleo-Inuit	pond	Canis sp.	cranium	maxilla (R: P1, P4-M1 roots; L P2-M1 roots)	n/a	adult		teeth broken/worn postmortem	Darwent, C.M.	Haffenreffer Museum	Giddings, J. Louis		Giddings & Anderson 1986: Fig. 19	fauna from bottom of small pond adjacent to site and partially excavated from mound itself (n = 2)
M-14045	NA			Brown, S.K. (VGL)	UC Davis	5/27/2014	Yes	Dog	Fail	NA	Yes	3.5	A2a	NA	Greenland	NW Greenland	Smith Sound, NW Greenland	n/a	AD 1896	Historical	Historical	n/a	C. l. familiaris	skeleton	complete		adult (old)	M	missing upper L C + R/L P4 w/ alveolar resorption; missing lower L p4, M2, M3 w/alveolar absorption; broken lower carnasial crowns with hole? + abscessing (L/R)	Darwent, C.M.	American Museum of Natural History	Robert E. Peary Expedition	1896		left lower p4 (mesial 1/2) + turbinate fragment sampled
M-14445	NA			Brown, S.K. (VGL)	UC Davis	5/27/2014	Yes	Dog	A2a	CTGAGATTCTTCTTAAACTATTCCCTGACACCCCTACATTCATATATTGAATCACCCCTACTGTGCTATGTCAGTATCTCCAGGTAAACCCTTCTCCCCTCCCCTATGTACGTCGTGCATTAATGGTTTGCCCCATGCATATAAGCATGTACATAATATTATATCCTTACATAGGACATATTAACTCAATCTCATAGTTCACTGATCTATCAACAGTAATCGAATGCATATCACTTAGTCCAATAAGGGCTTAATCACCATGCCTCGAGAAACCATCAACCCTTGCTCGTAATGTCCCTCTTCTCGCTCCGGGCCCATACTAACGTGGGGGTTACTATCATGAAACTATACCTGGCATCTGGTTCTTACTTCAGGGCCATAACTTTATTTACTCCAATC…	Yes	17.9	A2a	A2a	Greenland	NW Greenland	Smith Sound, NW Greenland	n/a	AD 1896	Historical	Historical	n/a	C. l. familiaris	skeleton	complete		adult (moderate wear)	M	bullet hole in palate; missing upper P2, alveolar resorption; lower P4 alveolar resorption	Darwent, C.M.	American Museum of Natural History	Robert E. Peary Expedition	1896		left lower first incisor sampled
M-5824	NA			Brown, S.K. (VGL)	UC Davis	6/18/2012	No	Fail	Fail	NA	No	NA	NA	NA	Alaska	Seward Peninsula	Wales, Seward Peninsula	n/a	AD 1900 - 1950s	Modern	Modern	surface find	C. l. familiaris	mandible	complete (p1-m2)	L	adult (no wear)		tissue still adhering	Brown, S.K.	UA Museum of the North	Lucier, Charles V.	1950s
NAPI-2:14	NA			Brown, S.K. (VGL)	UC Davis	10/29/2013	Yes	Dog	A2b or A2a	GCTGAGATTCTTCTTAAACTATTCCCTGACACCCCTACATTCATATATTGNNNNNNNNNNNNNNNNNNNNNNNNNNNNNNNNNNNNNNNNNNNNNNNNCCCTCCCCNTATGTACGTCGTGCATTAATGGTTTGCCCCATGCATATAAGCATGTACATAATATTATATCCTTACATAGGANCATATTAACTCAATCTCATAGTTCACTGATCTACCAACAGTAATCGAATGCATATCACTTAGTCCAATAAGGGCTTAATCACCATGCCTCGAGAAACCATNNNCAACCCTTGCTCGTANATGTCCCTCTTCTCGCTCCGGGCCCATACTANACGTGGGGGTTACTATCATGAAACTATACCTGGCATCTGGNTTCTTACTTCAGGGCCANNNTNANACT…	Yes	4.4	A2b	NA	Northwest Territories	western Coronation Gulf	Clachan, western Coronation Gulf	NaPi-2	AD 1225 - 1400	early Thule	Inuit	n/a	Canis sp.	mandible	complete (p2, p4-m2)	L	adult (slight wear)	M	congenital absence of p1; stained dark brown	Brown, S.K./ C.M. Darwent	Canadian Museum of History	Morrison, David		Morrison 1983	AS# 791; m1 extracted by D. Morrison
NAPI-2:15-38-21	NA			Brown, S.K. (VGL)	UC Davis	10/29/2013	No	Fail	Fail	NA	No	NA	NA	NA	Northwest Territories	western Coronation Gulf	Clachan, western Coronation Gulf	NaPi-2	AD 1225 - 1400	early Thule	Inuit	35-40 cm BD	Canis sp.	mandible	complete (p2-m2)	R	adult (no wear)	F	coronoid process gnawed off	Brown, S.K./ C.M. Darwent	Canadian Museum of History	Morrison, David		Morrison 1983	AS# 791; m1 extracted by D. Morrison
NAPI-2:16	NA			Brown, S.K. (VGL)	UC Davis	10/29/2013	Yes	Dog	A1b	TTCTTAATCACCATGCCTCGAGAAACCATCAACCCTTGCTCGTAATGTCCCTCTTCTCGCTCCGGGCCCATACTAACGTGGGGGTTACTATCATGAAACTATACCTGGCATCTGGTTCTTACTTCAGGGCCATAACTTTATTTACTCCAATCCTACTAATTCTCGCAAATGGGACATCT:CGATGGACTAATGACTAATCAGCCCATGATCA	Yes	2.66; 3.8	NA	NA	Northwest Territories	western Coronation Gulf	Clachan, western Coronation Gulf	NaPi-2	AD 1225 - 1400	early Thule	Inuit	n/a	Canis sp.	mandible	horizontal ramus	?	adult		n/a	Brown, S.K./ C.M. Darwent	Canadian Museum of History	Morrison, David		Morrison 1983
NAPI-2:19	NA			Brown, S.K. (VGL)	UC Davis	2/24/2013	Yes	Dog	A2a	NNNNNNNNNNNNNNNNNNNNNNNNNNNNNNNNNNNNNNNNNNNNNNNNNNNNNNNNNNNNNNNNNNNNNNNNNNNNNNNNNNNNNNNNNNNNNNNNNNNCCTCCCCNTATGTACGTCGTGCATTAATGGTTTGCCCCATGCATATAAGCATGTACATAATATTATATCCTTACATAGGANCATATTAACTCAATCTCATAGTTCACTGATCTACCAACAGTAATCGAATGCATATCACTTAGTCCAATAAGGGCTTAATCACCATGCCTCGAGAAACCATNNNCAACCCTTGCTCGTANATGTCCCTCTTCTCGCTCCGGGCCCATACTANACGTGGGGGTTACTATCATGAAACTATACCTGGCATNNNNNNNNNNNNNNNNNNNNNNNNNNNNNNNN…	No	NA	NA	NA	Northwest Territories	western Coronation Gulf	Clachan, western Coronation Gulf	NaPi-2	AD 1225 - 1400	early Thule	Inuit	n/a	Canis sp.	mandible	incisor alveolus to M3 (m1-2)	L	adult (no wear)	?	congenital absence of p1; broken at gonial angle	Brown, S.K./ C.M. Darwent	Canadian Museum of History	Morrison, David		Morrison 1983	AS# 719; matches to NaPi-2-10; m1 extracted by D. Morrison
NAPI-2:28-15-6	NA			Brown, S.K. (VGL)	UC Davis	2/24/2013	Yes	Dog	A2a	GCTGAAATTCTTCTTAAACTATTCCCTGACACCCCTACATTCATATATTGAATCACCCCTACTGTGCTATGTCAGTATCTCCAGGTAAACCCTTCTTNCCCTCCCCCTATGTACGTCGTGCATTAATGGTTTGCCCCATGCATATAAGCATGTACATAATATTATATCCTTACATAGGANCATATTAACTCAATCTCATAGTTCACTGATCTACCAACAGTAATCGAATGCATATCACTTAGTCCAATAAGGGCTTAATCACCATGCCTCGAGAAACCATNNNCAACCCTTGCTCGTANATGTCCCTCTTCTCGCTCCGGGCCCATACTANACGTGGGGGTTACTATCATGAAACTATACCTGGCATCTGGNTTCTTACTTCAGGGCCANNNTNANACT…	Yes	8.7	A2a	NA	Northwest Territories	western Coronation Gulf	Clachan, western Coronation Gulf	NaPi-2	AD 1225 - 1400	early Thule	Inuit	n/a	Canis sp.	mandible	complete (p3-m3)	R	adult (heavy wear)	M	congenital absence of p1, p2 (or alveolar resorption); stained dark brown	Brown, S.K./ C.M. Darwent	Canadian Museum of History	Morrison, David		Morrison 1983	AS# 719; does not match any left mandibles; m1 extracted by D. Morrison
NAPI-2:29-1b-5	NA			Brown, S.K. (VGL)	UC Davis	10/29/2013	Yes	Fail	Fail	NA	No	NA	NA	NA	Northwest Territories	western Coronation Gulf	Clachan, western Coronation Gulf	NaPi-2	AD 1225 - 1400	early Thule	Inuit	n/a	Canis sp.	mandible	horizontal ramus (m2)	L	adult (no wear)	F	congenital absence of p1; stained dark brown; ascending ramus gnawed off	Brown, S.K./ C.M. Darwent	Canadian Museum of History	Morrison, David		Morrison 1983	AS# 791
NAPI-2:33-17	NA			Brown, S.K. (VGL)	UC Davis	10/29/2013	Yes	Dog	A2a	NNNNNNNNNNNNNNNNNNNNNNNNNNNNNNNNNNNNNNNNNNNNNNNNNNNNNNNNNNNNNNNNNNNNNNNNNNNNNNNNNNNNNNNNNNNNNNNNNNNNNNCCCCNTATGTACGTCGTGCATTAATGGTTTGCCCCATGCATATAAGCATGTACATAATATTATATCCTTACATAGGANCATATTAACTCAATCTCATAGTTCACTGATCTACCAACAGTAATCGAATGCATATCACTTAGTCCAATAAGGGCTTAATCACCATGCCTCGAGAAACCATNNNCAACCCTTGCTCGTANATGTCCCTCTTCTCGCTCCGGGCCCATACTANACGTGGGGGTTACTATCATGAAACTATACCTGGCATCTGGNTTCTTACTTCAGGGCCANNNTNANACT…	No	NA	NA	NA	Northwest Territories	western Coronation Gulf	Clachan, western Coronation Gulf	NaPi-2	AD 1225 - 1400	early Thule	Inuit	n/a	Canis sp.	mandible	complete (p4-m2)	R	adult (no wear)	F	congenital absence of p1; missing mesial tip + cronoid process	Brown, S.K./ C.M. Darwent	Canadian Museum of History	Morrison, David		Morrison 1983	AS# 719; m1 extracted by D. Morrison
NAPI-2:33-8	NA			Brown, S.K. (VGL)	UC Davis	2/24/2013	Yes	Dog	A1b	NNNNNNNNNNNNNNNNNNNNNNNNNNNNNNNNNNNNNNNNNNNNNNNNNNNNNNNNNNNNNNNNNNNNNNNNNNNNNNNNNNNNNNNNNNNNNNNNNNNNNTCCCCNTATGTACGTCGTGCATTAATGGTTTGCCCCATGCATATAAGCATGTACATAATATTATATCCTTACATAGGANCATATTAACTCAATCTCATAGTTCACTGATCTATCAACAGTAATCAAATGCATATCACTTAGTCCAATAAGGGCTTAATCACCATGCCTCGAGAAACCATNNNCAACCCTTGCTCGTANATGTCCCTCTTCTCGCTCCGGGCCCATACTANACGTGGGGGTTACTATCATGAAACTATACCTGGCATCTGGNTTCTTACTTCAGGGCCANNNTNANACT…	No	NA	NA	NA	Northwest Territories	western Coronation Gulf	Clachan, western Coronation Gulf	NaPi-2	AD 1225 - 1400	early Thule	Inuit	15-20 cm BD	Canis sp.	mandible	complete	L	adult (slight wear)	F	p1 alveolus; carnivore gnawing at gonial angle; missing tip of coronoid process	Brown, S.K./ C.M. Darwent	Canadian Museum of History	Morrison, David		Morrison 1983	AS# 719; m1 extracted by D. Morrison
NAPI-2:C70-10	NA			Brown, S.K. (VGL)	UC Davis	8/15/2013	Yes	Dog	Fail	NA	Yes	5.1	A2b	NA	Northwest Territories	western Coronation Gulf	Clachan, western Coronation Gulf	NaPi-2	AD 1225 - 1400	early Thule	Inuit	n/a	Canis sp.	mandible	complete (p2, m1-2)	L	adult (slight wear)	M	congenital absence of p1; coronoid process tip carnivore gnawed off	Brown, S.K./ C.M. Darwent	Canadian Museum of History	Morrison, David		Morrison 1983	AS# 791; m1 extracted by D. Morrison
NCPF-1:8-20	NA			Brown, S.K. (VGL)	UC Davis	6/8/2014	Yes	Dog	Fail	NA	Yes	3.6	A2a	NA	Northwest Territories	Cape Krusenstern, Coronation Gulf	Nuvuk, Cape Krusenstern, Coronation Gulf	NcPf-1	AD 1200 - 1300	early Thule	Inuit	n/a	Canis sp.	mandible	complete	L	adult	F		Brown, S.K./ C.M. Darwent	Canadian Museum of History	Morrison, David		Morrison 1983
NCPF-12:2-18	NA			Brown, S.K. (VGL)	UC Davis	2/19/2013	Yes	Dog	A2a	NNNNNNNNNNNNNNNNNNNNNNNNNNNNNNNNNNNNNNNNNNNNNNNNNNNNNNNNNNNNNNNNNNNNNNNNNNNNNNNNNNNNNNNNNNNNNNNNNNNNNNNNNNNNNNNNNCGTCGTGCATTAATGGTTTGCCCCATGCATATAAGCATGTACATAATATTATATCCTTACATAGGANCATATTAACTCAATCTCATAGTTCACTGATCTACCAACAGTAATCGAATGCATATCACTTAGTCCAATAAGGGCTTAATCACCATGCCTCGAGAAACCATNNNCAACCCTTGCTCGTANATGTCCCTCTTCTCGCTCCGGGCCCATACTANACGTGGGGGTTACTATCATGAAACTATACCTGGCATCTGGNTTCTTACTTCAGGGCCANNNTNANACT…	Yes	1	NA	NA	Northwest Territories	Cape Krusenstern, Coronation Gulf	Beulah, Cape Krusenstern, Coronation Gulf	NcPf-12	AD 1200 - 1300	early Thule	Inuit	n/a	Canis sp.	mandible	horizontal ramus + coronoid process	L	adult	F		Brown, S.K./ C.M. Darwent	Canadian Museum of History	Morrison, David		Morrison 1983
NGTN-1:6802M	NA			Brown, S.K. (VGL)	UC Davis	8/15/2013	Yes	Dog	A2a	NNNNNNNNNNNNNNNNNNNNNNNNNNNNNNNNNNNNNNNNNNNNNNNNNNNNNNNNNNNNNNNNNNNNNNNNNNNNNNNNNNNNNNNNNNNNNNNNNNCCCTCCCCNTATGTACGTCGTGCATTAATGGTTTGCCCCATGCATATAAGCATGTACATAATATTATATCCTTACATAGGANCATATTAACTCAATCTCATAGTTCACTGATCTACCAACAGTAATNNNNNNNNNNNNNNNNNNNNNNNNNNNNNNNNNNNNNNNNNNNNNNNNNNNNNNNNNNNNNNNNNNNNNNNNNNNNNNNNNNNNNNNNNNNNNNNNNNNNNNNNNNNNNNNNNNNNNNNNNNNNNNNNNNNNNNNNCTGGCATCTGGNTTCTTACTTCAGGGCCANNNTNANACT…	Yes	2.7; 1.1	NA	NA	Northwest Territories	Eskimo Lakes, Mackenzie Delta	Saunaktuk, Eskimo Lakes, Mackenzie Delta	NgTn-1	AD 1400 - 1500	Classic Thule	Inuit	6-8W, 0-2S; 10-12 cm	Canis sp.	mandible	complete (dm x 2, m1)	L	juvenile			Darwent, C.M.	Prince of Wales Northern Heritage Centre	Arnold, Charles D.	1984-85	Betts 2008	teeth collected
NGTN-1:6802S	NA			Brown, S.K. (VGL)	UC Davis	9/9/2013	No	Fail	Fail	NA	No	NA	NA	NA	Northwest Territories	Eskimo Lakes, Mackenzie Delta	Saunaktuk, Eskimo Lakes, Mackenzie Delta	NgTn-1	AD 1400 - 1500	Classic Thule	Inuit	6-8W, 0-2S; 10-12 cm	Canis sp.	scapula	complete	R	adult		charred	Darwent, C.M.	Prince of Wales Northern Heritage Centre	Arnold, Charles D.	1984-85	Betts 2008	blade fragment collected
NGTN-1:81002T	NA			Brown, S.K. (VGL)	UC Davis	6/8/2014	Yes	INDET	Fail	NA	Yes	0.6	NA	NA	Northwest Territories	Eskimo Lakes, Mackenzie Delta	Saunaktuk, Eskimo Lakes, Mackenzie Delta	NgTn-1	AD 1400 - 1500	Classic Thule	Inuit	8-10W, 0-2S; 0-10 cm	Canis sp.	tooth (incisor)	complete		adult			Darwent, C.M.	Prince of Wales Northern Heritage Centre	Arnold, Charles D.	1984-85	Betts 2008	likely fits to 6802
NHTN-1:2023M	NA			Brown, S.K. (VGL)	UC Davis	8/15/2013	Yes	Wolf	Fail	NA	Yes	2.6	NA	NA	Northwest Territories	Eskimo Lakes, Mackenzie Delta	Gutchiak, Eskimo Lakes, Mackenzie Delta	NhTn-1	AD 1700 - 1850	Historical Inuvialuit	Historical	2023	Canis sp.	mandible	complete (p3-4)	L	adult			Darwent, C.M.	Prince of Wales Northern Heritage Centre	Morrison, David	1991	Betts 2008	does not match 2099; p3, p4 collected
NHTN-1:2036H	NA			Brown, S.K. (VGL)	UC Davis	12/3/2013	Yes	Dog	A2a	TTCTTAATCACCATGCCTCGAGAAACCATCAACCCTTGCTCGTAATGTCCCTCTTCTCGCTCCGGGCCCATACTAACGTGGGGGTTACTATCATGAAACTATACCTGGCATCTGGTTCTTACTTCAGGGCCATAACTTTATTTACTCCAATCCTACTAATTCTCGCAAATGGGACATCTCGATGGACTAATGACTAATCAGCCCATGATCACAC	Yes	2.4; 9.7	A2a	NA	Northwest Territories	Eskimo Lakes, Mackenzie Delta	Gutchiak, Eskimo Lakes, Mackenzie Delta	NhTn-1	AD 1700 - 1850	Historical Inuvialuit	Historical	2036	Canis sp.	humerus	complete	L	juvenile		partly burned	Darwent, C.M.	Prince of Wales Northern Heritage Centre	Morrison, David	1991	Betts 2008	does not match 2048
NHTN-1:2048H	NA			Brown, S.K. (VGL)	UC Davis	6/8/2014	Yes	Dog	A1b	CTGAGATTCTTCTTAAACTATTCCCTGACACCCCTACATTCATATATTGAATCACCCCTACTGTGCTATGTCAGTATCTCCAGGTAAACCCTTCTCCCCTCCCCTATGTACGTCGTGCATTAATGGTTTGCCCCATGCATATAAGCATGTACATAATATTATATCCTTACATAGGACATATTAACTCAATCTCATAGTTCACTGATCTATCAACAGTAATCAAATGCATATCACTTAGTCCAATAAGGGCTTAATCACCATGCCTCGAGAAACCATCAACCCTTGCTCGTAATGTCCCTCTTCTCGCTCCGGGCCCATACTAACGTGGGGGTTACTATCATGAAACTATACCTGGCATCTGGTTCTTACTTCAGGGCCATAACTTTATTTACTCCAATC…	Yes	28.3	A1b	A1b	Northwest Territories	Eskimo Lakes, Mackenzie Delta	Gutchiak, Eskimo Lakes, Mackenzie Delta	NhTn-1	AD 1700 - 1850	Historical Inuvialuit	Historical	2048	Canis sp.	humerus	complete	R	juvenile		prox/dist unfused	Darwent, C.M.	Prince of Wales Northern Heritage Centre	Morrison, David	1991	Betts 2008	does not match 2036
NHTN-1:2099M	NA			Brown, S.K. (VGL)	UC Davis	8/15/2013	Yes	Dog	Fail	NA	Yes	2.3	NA	NA	Northwest Territories	Eskimo Lakes, Mackenzie Delta	Gutchiak, Eskimo Lakes, Mackenzie Delta	NhTn-1	AD 1700 - 1850	Historical Inuvialuit	Historical	2099	Canis sp.	mandible	mesial 1/2 (p2-4)	R	adult		no congenital absence of p1	Darwent, C.M.	Prince of Wales Northern Heritage Centre	Morrison, David	1991	Betts 2008	does not match 2123
NHTN-1:2133H	NA			Brown, S.K. (VGL)	UC Davis	12/3/2013	Yes	Dog	Fail	NA	Yes	0.8; 3.3	NA	NA	Northwest Territories	Eskimo Lakes, Mackenzie Delta	Gutchiak, Eskimo Lakes, Mackenzie Delta	NhTn-1	AD 1700 - 1850	Historical Inuvialuit	Historical	2133	Canis sp.	humerus	complete	L	juvenile		prox unfused, dist fused	Darwent, C.M.	Prince of Wales Northern Heritage Centre	Morrison, David	1991	Betts 2008
NHTS-2:C6-9-4	NA			Brown, S.K. (VGL)	UC Davis	6/8/2014	Yes	Dog	Fail	NA	Yes	1.3	NA	NA	Northwest Territories	Richards Island, Mackenzie Delta	Cache Point, Richards Island, Mackenzie Delta	NhTs-2, Feature 6	AD 1200 - 1300	early Thule	Inuit	Unit N14, W10; Level 4	Canis sp.	femur	complete	L	adult			Friesen, T.M.	U Toronto/Prince of Wales Northern Heritage Center	Friesen, T. Max	1998	Betts 2008
NHTS-2:C8-P1	NA			Brown, S.K. (VGL)	UC Davis	6/8/2014	Yes	INDET	Fail	NA	Yes	0.7	NA	NA	Northwest Territories	Richards Island, Mackenzie Delta	Cache Point, Richards Island, Mackenzie Delta	NhTs-2, Feature 8	AD 1200 - 1300	early Thule	Inuit	Unit N23, W9; Level 3	Canis sp.	pelvis	complete	R	adult		ilium carnivore gnawed	Darwent, C.M.	Prince of Wales Northern Heritage Centre	Friesen, T. Max	1998	Betts 2008
NHTS-2:C8-P2	NA			Brown, S.K. (VGL)	UC Davis	6/8/2014	Yes	Fail	Fail	NA	No	NA	NA	NA	Northwest Territories	Richards Island, Mackenzie Delta	Cache Point, Richards Island, Mackenzie Delta	NhTs-2, Feature 8	AD 1200 - 1300	early Thule	Inuit	Unit N23, W10; Level 3	Canis sp.	pelvis	acetabulum + ilium/ischium/pubis fragment	R	adult		ilium/pubis gnawed	Darwent, C.M.	Prince of Wales Northern Heritage Centre	Friesen, T. Max	1998	Betts 2008
NIHF-4:132C	NA			Brown, S.K. (VGL)	UC Davis	1/23/2013	Yes	Dog	A2a	CTGAGATTCTTCTTAAACTATTCCCTGACACCCCTACATTCATATATTGAATCACCCCTACTGTGCTATGTCAGTATCTCCAGGTAAACCCTTCTCCCCTCCCCTATGTACGTCGTGCATTAATGGTTTGCCCCATGCATATAAGCATGTACATAATATTATATCCTTACATAGGACATATTAACTCAATCTCATAGTTCACTGATCTACCAACAGTAATCGAATGCATATCACTTAGTCCAATAAGGGCTTAATCACCATGCCTCGAGAAACCATCAACCCTTGCTCGTAATGTCCCTCTTCTCGCTCCGGGCCCATACTAACGTGGGGGTTACTATCATGAAACTATACCTGGCATCTGGTTCTTACTTCAGGGCCATAACTTTATTTACTCCAATC…	Yes	14.3	A2a	A2a	Nunavut	Igloolik Island	Tikilik, Igloolik Island	NiHf-4, unknown	AD 1200 - 1400	early Thule	Inuit	Unit 13N, 2E; upper peat layer	Canis sp.	cranium	palate/alveolus (C-M1)	R	adult			Darwent, C.M.	Prince of Wales Northern Heritage Centre	Rowley, Susan	1993-94	not previously reported	P3, P4, M2 collected for sampling
NIHF-4:1C	NA			Brown, S.K. (VGL)	UC Davis	1/23/2013	Yes	Dog	A1b	CTGAGATTCTTCTTAAACTATTCCCTGACACCCCTACATTCATATATTGAATCACCCCTACTGTGCTATGTCAGTATCTCCAGGTAAACCCTTCTCCCCTCCCCTATGTACGTCGTGCATTAATGGTTTGCCCCATGCATATAAGCATGTACATAATATTATATCCTTACATAGGACATATTAACTCAATCTCATAGTTCACTGATCTATCAACAGTAATCAAATGCATATCACTTAGTCCAATAAGGGCTTAATCACCATGCCTCGAGAAACCATCAACCCTTGCTCGTAATGTCCCTCTTCTCGCTCCGGGCCCATACTAACGTGGGGGTTACTATCATGAAACTATACCTGGCATCTGGTTCTTACTTCAGGGCCATAACTTTATTTACTCCAATC…	Yes	68.9	A1b	A1b	Nunavut	Igloolik Island	Tikilik, Igloolik Island	NiHf-4, House 1	AD 1200 - 1400	early Thule	Inuit	House Floor	Canis sp.	cranium	palate/alveolus (C-M2)	R	adult			Darwent, C.M.	Prince of Wales Northern Heritage Centre	Rowley, Susan	1993-94	not previously reported	palate fragment collected for sampling
NIHF-4:249C	NA			Brown, S.K. (VGL)	UC Davis	6/8/2014	Yes	Dog	A1b	NNNNNNNNNNNNNNNNNNNNNNNNNNNNNNNNNNNNNNNNNNNNNNNNNNNNNNNNNNNNNNNNNNNNNNNNNNNNNNNNNNNNNNNNNNNNNNNNNNCCCTCCCCNTATGTACGTCGTGCATTAATGGNTTGCCCCATGCATATAAGCATGTACATAATATTATATCCTTACATAGGANCATATTAACTCAATCTCATAGTTCACTGATCTATCAACAGTAATCAAATGCATATCACTTAGTCCAATAAGGGCTTAATCACCATGCCTCGAGAAACCATNNNCAACCCTTGCTCGTANATGTCCCTCTTCTCGCTCCGGGCCCATACTANACGTGGGGGTTACTATCATGAAACTATACCTGGCATCTGGNTTCTTACTTCAGGGCCANNNTNANACT…	Yes	2.4	NA	NA	Nunavut	Igloolik Island	Tikilik, Igloolik Island	NiHf-4, unknown	AD 800 - 1100	Late Dorset	Paleo-Inuit	Unit -24N, 9E; lower black soil layer	Canis sp.	cranium	complete	n/a	adult			Darwent, C.M.	Prince of Wales Northern Heritage Centre	Rowley, Susan	1993-94	not previously reported	1 R canine collected for sampling
NIHF-4:3422C	NA			Brown, S.K. (VGL)	UC Davis	6/8/2014	Yes	INDET	Fail	NA	Yes	0.2	NA	NA	Nunavut	Igloolik Island	Tikilik, Igloolik Island	NiHf-4, Feature 22	AD 800 - 1100	Late Dorset	Paleo-Inuit	Unit -34N, -22E; lower black soil layer	Canis sp.	canine	complete	R	adult			Darwent, C.M.	Prince of Wales Northern Heritage Centre	Rowley, Susan	1993-94	not previously reported
NIHF-4:4BSP	NA			Brown, S.K. (VGL)	UC Davis	3/5/2013	Yes	Dog	A2b	CTGAGATTCTTCTTAAACTATTCCCTGACACCCCTACATTCATATATTGAATCACCCCTACTGTGCTATGTCAGTATCTCCAGGTAAACCCTTCTCCCCTCCCCTATGTACGTCGTGCATTAATGGTTTGCCCCATGCATATAAGCATGTACATAATATTATATTCTTACANNNNNNNNNNNNNCTCAATCTCAYARTTCATTGATCTATCAACAGTAAYCRAATGCATATCACTTAGTCCAATAAGGGCTTAATCACCATGCCTCGAGAAACCATCAACCCTTGCTCGTAATGTCCCTCTTCTCGCTCCGGGCCCATACTAACGTGGGGGTTACTATCATGAAACTATACCTGGCATCTGGTTCTTACTTCAGGGCCATAACTTTATTTACTCCAATC…	Yes	5.6	A2b	NA	Nunavut	Igloolik Island	Tikilik, Igloolik Island	NiHf-4, Feature 4	AD 800 - 1100	Late Dorset	Paleo-Inuit	Unit 1N, -5E; lower black soil layer	Canis sp.	pelvis	acetabulum + ilium/ischium fragment		adult			Darwent, C.M.	Prince of Wales Northern Heritage Centre	Rowley, Susan	1993-94	Murray 1996	labeled as dog by Murray, but does not match comparative
NIHF-4:4PLM	NA			Brown, S.K. (VGL)	UC Davis	1/23/2013	Yes	Dog	A2a	GCTGAGATTCTTCTTAAACTATTCCCTGACACCCCTACATTCATATATTGAATCACCCCTACTGTGCTATGTCAGTATCTCCAGGTAAACCCTTCTCNCCCTCCCCNTATGTACGTCGTGCATTAATGGTTTGCCCCATGCATATAAGCATGTACATAATATTATATCCTTACATAGGANCATATTAACTCAATCTCATAGTTCACTGATCTACCAACAGTAATCGAATGCATATCACTTAGTCCAATAAGGGCTTAATCACCATGCCTCGAGAAACCATNNNCAACCCTTGCTCGTANATGTCCCTCTTCTCGCTCCGGGCCCATACTANACGTGGGGGTTACTATCATGAAACTATACCTGGCATCTGGNTTCTTACTTCAGGGCCANNNTNANACT…	Yes	16.5	A2a	A2a	Nunavut	Igloolik Island	Tikilik, Igloolik Island	NiHf-4, Feature 4	AD 1200 - 1400	early Thule	Inuit	Unit -1N, -3E; upper peat layer	Canis sp.	mandible	complete (p1-m3)	L	adult			Darwent, C.M.	Prince of Wales Northern Heritage Centre	Rowley, Susan	1993-94	not previously reported	m1, m2 collected for sampling
NIHF-4:9BSM	NA			Brown, S.K. (VGL)	UC Davis	3/5/2013	Yes	Dog	A2b	GCTGAGATTCTTCTTAAACTATTCCCTGACACCCCTACATTCATATATTGAATCACCCCTACTGTGCTATGTCAGTATCTCCAGGTAAACCCTTCTCNCCCTCCCCNTATGTACNNNNNNNNNNNNNNNNNNNNNNNNNNNNNNNNNNNNNNNNNNNNNNNNNNNNNNNNNNNNNNNNNNNNNNNNNNNNNNNNNNNNNNNNNNNNNNNNNNNNNNNNNNNNNNNNNNNNNNNNNNNNNNNNNNNNNNNNNNNCTTAATCACCATGCCTCGAGAAACCATNNNCAACCCTTGCTCGTANATGTCCCTCTTCTCGCTCCGGGCCCATACTANACGTGGGGGTTACTATCATGAAACTATACCTGGCATCTGGNTTCTTACTTCAGGGCCANNNTNANACT…	Yes	6.7	A2b	NA	Nunavut	Igloolik Island	Tikilik, Igloolik Island	NiHf-4, Feature 9	AD 800 - 1100	Late Dorset	Paleo-Inuit	Unit 56N, -7E; lower black soil layer	Canis sp.	mandible	ascending ramus	L	adult			Darwent, C.M.	Prince of Wales Northern Heritage Centre	Rowley, Susan	1993-94	Murray 1996	ascending ramus fragment collected for sampling
NIHF-4:TDL	NA			Brown, S.K. (VGL)	UC Davis	1/23/2013	Yes	Dog	A2b?	GCTGAGATTCTTCTTAAACTATTCCCTGACACCCCTACATTCATATATTGNNNNNNNNNNNNNNTGCTATGTCAGTATCTCCAGGTAAACCCTTCTCNCCCTCCCCNTATGTACGTCGTGCATTAATGGTTTGCCCCATGCATATAAGCATGTACATAATATTATATCCTTACATAGGANCATATTAACTCAATCTCATAGTTCACTGATCTATCAACAGTAATCGAATGCATATCACTTAGTCCAATAAGGGCTTAATCACCATGCCTCGAGAAACCATNNNCAACCCTTGCTCGTANATGTCCCTCTTCTCGCTCCGGGCCCATACTANACGTGGAGGTTACTATMATGAAACTATACCTGGCATCTGGNTTCTTACTTCAGGGCCANNNTNANACT…	Yes	2.7	NA	NA	Nunavut	Igloolik Island	Tikilik, Igloolik Island	NiHf-4, unknown	AD 1200 - 1400	early Thule	Inuit	Test D; upper peat layer	Canis sp.	lumbar	complete	n/a	adult		2 verts articulated	Darwent, C.M.	Prince of Wales Northern Heritage Centre	Rowley, Susan	1993-94	not previously reported	processed of 1 vert collected for sampling
NITR-2:T1	NA			Brown, S.K. (VGL)	UC Davis	9/4/2013	No	Fail	Fail	NA	No	NA	NA	NA	Northwest Territories	Tuktoyaktuk Peninsula	Kittigazuit, Tuktoyaktuk Peninsula	NiTr-2	AD 1400 - 1900	Thule/Inuvialuit	Inuit	n/a	Canis sp.	tibia	prox + 1/4 shaft	R	adult		spiral fracture on prox/post shaft	Brown, S.K./ C.M. Darwent	Canadian Museum of History	McGhee, Robert	1969-70	McGhee 1988	#678
NITS-1:4794C	NA			Brown, S.K. (VGL)	UC Davis	5/29/2014	No	Fail	Fail	NA	No	NA	NA	NA	Northwest Territories	Richard's Island, Mackenzie Delta	Kuukpak (Gupuk), Richard's Island, Mackenzie Delta	NiTs-1, Area 1, Feature 1, Midden	AD 1280 - 1400	early Thule	Inuit	Test Pit, Level 4	Canis sp.	canine	complete		adult		modified?	Darwent, C.M.	Prince of Wales Northern Heritage Centre	Arnold, Charles D.	2002	Betts 2008	#4794
NITS-1:A2H1M	NA			Brown, S.K. (VGL)	UC Davis	3/5/2013	Yes	Dog	A clade	NNNNNNNNNNNNNNNNNNNNNNNNNNNNNNNNNNNNNNNNNNNNNNNNNNNNNNNNNNNNNNNNNNNNNNNNNNNNNNNNNNNNNNNNNNNNNNNNNNNNNNNNNNNNNNNNNNNNNNNNNNNNNNNNNNNNNNNNNNNNNNNNNNNNNNNNNNNNNNNNNNNNNNNNNNNNNNNNNNNNNNNNNNNNNNNNNNNNNNNNNNNNNNNNNNNNNNNNNNNNNNNNNNNNNNNNNNNNNNNNNNNNNNNNNNNNNCTTAATCACCATGCCTCGAGAAACCATNNNCAACCCTTGCTCGTANATGTCCCTCTTCTCGCTCCGGGCCCATACTANACGTGGGGGTTACTATCATGAAACTATACCTGGCATCTGGNTTCTTACTTCAGGGCCANNNTNANACT…	Yes	4	NA	NA	Northwest Territories	Richard's Island, Mackenzie Delta	Kuukpak (Gupuk), Richard's Island, Mackenzie Delta	NiTs-1, Area 2, House 1	AD 1450 - 1900	Thule/Inuvialuit	Inuit	Unit 3-5N, 19-21W; Level 3	Canis sp.	metacarpal	complete		adult			Darwent, C.M.	Prince of Wales Northern Heritage Centre	Arnold, Charles D.	1986-89	Betts 2008; Friesen and Arnold 1995	#4533
NITS-1:A2H1R	NA			Brown, S.K. (VGL)	UC Davis	5/29/2014	Yes	Fail	Fail	NA	Yes	0.6	NA	NA	Northwest Territories	Richard's Island, Mackenzie Delta	Kuukpak (Gupuk), Richard's Island, Mackenzie Delta	NiTs-1, Area 2, House 1	AD 1450 - 1900	Thule/Inuvialuit	Inuit	Unit 5-7N, 19-21W; Level 5	Canis sp.	rib	complete		newborn?			Darwent, C.M.	Prince of Wales Northern Heritage Centre	Arnold, Charles D.	1986-89	Betts 2008; Friesen and Arnold 1995	#4533
NITS-1:A2H1T	NA			Brown, S.K. (VGL)	UC Davis	3/5/2013	Yes	Dog	A2a	NNNNNNNNNNNNNNNNNNNNNNNNNNNNNNNNNNNNNNNNNNNNNNNNNNNNNNNNNNNNNNNNNNNNNNNNNNNNNNNNNNNNNNNNNNNNNNNNTNCCCTCCCCNTATGTACGTCGTGCATTAATGGTTTGCCCCATGCATATAAGCATGTACATAATATTATATCCTTACATAGGANCATATTAACTCAATCTCATAGTTCACTGATCTACCAACAGTAATCGAATGCATATCACTTAGTCCAATAAGGGCTTAATCACCATGCCTCGAGAAANNNNNNNNNNNNNNNNNNNNNNNNNNNNNNNNNNNNNNNNNNNNNNNNNNNNNNNNNNNNNNNNNNNNNNNNNNNNNNNNNNNNNNNNNNNNNNNNNNNNNNNNNNNNNNNNNNNNNNNNNNN…	Yes	0.3	NA	NA	Northwest Territories	Richard's Island, Mackenzie Delta	Kuukpak (Gupuk), Richard's Island, Mackenzie Delta	NiTs-1, Area 2, House 1	AD 1450 - 1900	Thule/Inuvialuit	Inuit	Unit 5-7N, 19-21W; Level 5	Canis sp.	tooth	incisor + canine fragment		adult			Darwent, C.M.	Prince of Wales Northern Heritage Centre	Arnold, Charles D.	1986-89	Betts 2008; Friesen and Arnold 1995	#4533
NITS-2:H1B	NA			Brown, S.K. (VGL)	UC Davis	1/23/2013	Yes	Fail	Fail	NA	No	NA	NA	NA	Northwest Territories	Richard's Island, Mackenzie Delta	Pond, Richard's Island, Mackenzie Delta	NiTs-2, House 1	AD 1220 - 1440	early Thule	Inuit	0-2N, 4-6E; 50-60 cm BD	Canis sp.	baculum	complete	n/a	adult		healed fracture at midshaft	Darwent, C.M.	U of Calgary	Arnold, Charles D.	1989	Betts 2008
NITS-2:H1H	NA			Brown, S.K. (VGL)	UC Davis	1/31/2013	Yes	Dog	Fail	NA	Yes	0.8	NA	NA	Northwest Territories	Richard's Island, Mackenzie Delta	Pond, Richard's Island, Mackenzie Delta	NiTs-2, House 1	AD 1220 - 1440	early Thule	Inuit	2-4N, 4-6E; 50-60 cm BD	Canis sp.	humerus	dist + 1/2 shaft	R	adult		cut marks on posterior midshaft; spiral fracture at midshaft	Darwent, C.M.	U of Calgary	Arnold, Charles D.	1989	Betts 2008
NITS-2:H2MC1	NA			Brown, S.K. (VGL)	UC Davis	1/31/2013	Yes	Dog	A1b	GCTGAGATTCTTCTTAAACTATTCCCTGACACCCCTACATTCATATATTGAATCACCCCTACTGTGCTATGTCAGTATCTCCAGGTAAACCCTTCTCNCCCTCCCCNTATGTACGTCGTGCATTAATGGTTTGCCCCATGCATATAAGCATGTACATAATATTATATCCTTACATAGGANCATATTAACTCAATCTCATAGTTCACTGATCTATCAACAGTAATCAAATGCATATCACTTAGTCCAATAAGGGCTTAATCACCATGCCTCGAGAAACCATNNNCAACCCTTGCTCGTANATGTCCCTCTTCTCGCTCCGGGCCCATACTANACGTGGGGGTTACTATCATGAAACTATACCTGGCATCTGGNTTCTTACTTCAGGGCCANNNTNANACT…	Yes	11	A1b	NA	Northwest Territories	Richard's Island, Mackenzie Delta	Pond, Richard's Island, Mackenzie Delta	NiTs-2, House 2	AD 1270 - 1640	early/Classic Thule	Inuit	0-2N, 0-2W; 50-60 cm BD	Canis sp.	metacarpal	complete		adult			Darwent, C.M.	U of Calgary	Arnold, Charles D.	1989	Betts 2008
NITS-2:H2MC2	NA			Brown, S.K. (VGL)	UC Davis	1/31/2013	Yes	Dog	A clade	NNNNNNNNNNNNNNNNNNNNNNNNNNNNNNNNNNNNNNNNNNNNNNNNNNNNNNNNNNNNNNNNNNNNNNNNNNNNNNNNNNNNNNNNNNNNNNNNNNNNNNNNNNNNNNNNNNNNNNNNNNNNNNNNNNNNNNNNNNNNNNNNNNNNNNNNNNNNNNNNNNNNNNNNNNNNNNNNNNNNNNNNNNNNNNNNNNNNNNNNNNNNNNNNNNNNNNNNNNNNNNNNNNNNNNNNNNNNNNNNNNNNNNNNNNNNNCTTAATCACCATGCCTCGAGAAACCATNNNCAACCCTTGCTCGTANATGTCCCTCTTCTCGCTCCGGGCCCATACTANACGTGGGGGTTACTATCATGAAACTATACCTGGCATCTGGNTTCTTACTTCAGGGCCANNNTNANACT…	No	NA	NA	NA	Northwest Territories	Richard's Island, Mackenzie Delta	Pond, Richard's Island, Mackenzie Delta	NiTs-2, House 2	AD 1270 - 1640	early/Classic Thule	Inuit	2-4N, 4-6E; 60-70 cm BD	Canis sp.	metacarpal	complete		juvenile		prox fused, dist unfused	Darwent, C.M.	U of Calgary	Arnold, Charles D.	1989	Betts 2008
NKRI-3:616M	NA			Brown, S.K. (VGL)	UC Davis	3/5/2013	Yes	Fail	Fail	NA	No	NA	NA	NA	Northwest Territories	south Amundsen Gulf	Tiktalik, south Amundsen Gulf	NkRi-3	AD 1200 - 1300	early Thule	Inuit	Unit S8, W4; Level 7; greasy floor	Canis sp.	mandible	horizontal ramus (p3, m1-2)	R	adult		p1 alveolus present; impact scar/spiral fracture at gonial angle	Darwent, C.M.	Prince of Wales Northern Heritage Centre	Morrison, David	1998	Moody& Hodgetts 2013	#616
NKRI-3:623M	NA			Brown, S.K. (VGL)	UC Davis	3/5/2013	Yes	Dog	Fail	NA	Yes	0.6	NA	NA	Northwest Territories	south Amundsen Gulf	Tiktalik, south Amundsen Gulf	NkRi-3	AD 1200 - 1300	early Thule	Inuit	Unit S8, W4; Level 7	Canis sp.	mandible	mesial 1/2 horizontal ramus	R	adult		congenital absence of p1	Darwent, C.M.	Prince of Wales Northern Heritage Centre	Morrison, David	1998	Moody& Hodgetts 2013	#623A
NLRU-1:623C2	NA			Brown, S.K. (VGL)	UC Davis	9/9/2013	Yes	Dog	A2a	NNNNNNNNNNNNNNNNNNNNNNNNNNNNNNNNNNNNNNNNNNNNNNNNNNNNNNNNNNNNNNNNNNNNNNNNNNNNNNNNNNNNNNNNNNNNNNNNNNNNNNNNNCNTATGTACGTCGTGCATTAATGGNTTGTTCNATGCATATAAGCATGTACATAATATTATATCCTTACATAGGANCATATTAACTCAATCTCATAGTTCACTGATCTACCAACAGTAATCGAATGCATATCACTTAGTCCAATAAGGGCTTAATCACCATGCCTCGAGAAACAAGNNNNNNNNNNNNNNNNNNNNNNNNNNNNNNNNNNNNNNNNNNNNNNNNNNNNNNNNNNNNNNNNNNNNNNNNNNNNNNNNNNNNNNNNNNNNNNNNNNNNNNNNNNNNNNNNNNNNNNN…	Yes	0.3	NA	NA	Northwest Territories	Cape Bathurst Peninsula, Mackenzie Delta	Iglulualuit, Cape Bathurst Peninsula, Mackenzie Delta	NlRu-1	AD 1280 - 1800	Thule/Inuvialuit	Inuit	n/a	Canis sp.	cranium??	complete	n/a	adult			Brown, S.K./ C.M. Darwent	Canadian Museum of History	Morrison, David	1987	Betts 2008; Morrison 1989	#677
NLRU-1:625M1	NA			Brown, S.K. (VGL)	UC Davis	9/9/2013	Yes	Dog	A1b	NNNNNNNNNNNNNNNNNNNNNNNNNNNNNNNNNNNNNNNNNNNNNNNNNNNNNNNNNNNNNNNNNNNNNNNNNNNNNNNNNNNNNNNNNNNNNNNNNNCCCTCCCCNTATGTACGTCGTGCATTAATGGTTTGCCCCATGCATATAAGCATGTACATAATATTATATCCTTACATAGGANCATATTAACTCAATCTCATAATTCACTGATCTATCAGCAGTAATCAAATGCATATCACTTAGTCCAATAAGGGCTTAATCACCATGCCTCGAGAAACCATNNNCAACCCTTGCTCGTANATGTCCCTCTTCTCGCTCCGGGCCCATACTANACGTGGGGGTTACTANNATGAAACTATACCTGGCATCTGGNTTCTTACTTCAGGGCCANNNTNANACT…	Yes	3.8	NA	NA	Northwest Territories	Cape Bathurst Peninsula, Mackenzie Delta	Iglulualuit, Cape Bathurst Peninsula, Mackenzie Delta	NlRu-1	AD 1280 - 1800	Thule/Inuvialuit	Inuit	n/a	Canis sp.	mandible	complete	R+L	juvenile			Brown, S.K./ C.M. Darwent	Canadian Museum of History	Morrison, David	1987	Betts 2008; Morrison 1989	#677
NLRU-1:626M2	NA			Brown, S.K. (VGL)	UC Davis	9/9/2013	Yes	Dog	Fail	NA	Yes	3.5; 2.7	NA	NA	Northwest Territories	Cape Bathurst Peninsula, Mackenzie Delta	Iglulualuit, Cape Bathurst Peninsula, Mackenzie Delta	NlRu-1	AD 1280 - 1800	Thule/Inuvialuit	Inuit	n/a	Canis sp.	mandible	complete	R+L	juvenile			Brown, S.K./ C.M. Darwent	Canadian Museum of History	Morrison, David	1987	Betts 2008; Morrison 1989	#677
OATI-1:F2-M1	NA			Brown, S.K. (VGL)	UC Davis	1/23/2013	Yes	Dog	A2b?	NNNNNNNNNNNNNNNNNNNNNNNNNNNNNNNNNNNNNNNNNNNNNNNNNNNNNNNNNNNNNNNNNNNNNNNNNNNNNNNNNNNNNNNNNNNNNNNNNNCCCTCCCCNTATGTACGTCGTGCATTAATGGTTTGCCCCATGCATATAAGCATGTACATAATATTATATCCTTACATAGGANCATATTAACTCAATCTCATAGTTCACTGATCTATCAACAGTAATCAAATGCATATCACTTAGTCCAATAAGGGCTTAATCACCATGCCTCGAGAAACCATNNNCAACCCTTGCTCGTANATGTCCCTCTTCTCGCTCCGGGCCCATACTANACGTGGGGGTTACTATCATGAAACTATACCTGGCATCTGGNTTCTTACTTCAGGGCCANNNTNANACT…	Yes	5.9	A2b	NA	Northwest Territories	Tuktoyaktuk Peninsula, Mackenzie Delta	McKinley Bay, Tuktoyaktuk Peninsula, Mackenzie Delta	OaTi-1, Area 1, Feature 2	AD 1410 - 1800	Thule/Inuvialuit	Inuit	Unit N50, W50; Level 4	Canis sp.	mandible	complete (p2-m2)	R	adult		congenital absence of p1	Darwent, C.M.	Prince of Wales Northern Heritage Center	Betts, Matthew	2004	Betts 2008	p3, p4, m1 sampled
OATI-1:F2-M2	NA			Brown, S.K. (VGL)	UC Davis	1/23/2013	Yes	Dog	A2b	GCTGAGATTCTTCTTAAACTATTCCCTGACACCCCTACATTCATATATTGAATCACCCCTACTGTGCTATGTCAGTATCTCCAGGTAAACCCTTCTCNCCCTCCCCNTATGTACGTCGTGCATTAATGGTTTGCCCCATGCATATAAGCATGTACATAATATTATATCCTTACATAGGANCATATTAACTCAATCTCATAGTTCACTGATCTACCAACAGTAATCGAATGCATATCACTTAGTCCAATAAGGGCTTAATCACCATGCCTCGAGAAACCATNNNCAACCCTTGCTCGTANATGTCCCTCTTCTCGCTCCGGGCCCATACTANACGTGGGGGTTACTATCATGAAACTATACCTGGCATCTGGNTTCTTACTTCAGGGCCANNNTNANACT…	Yes	5.3	A2b	NA	Northwest Territories	Tuktoyaktuk Peninsula, Mackenzie Delta	McKinley Bay, Tuktoyaktuk Peninsula, Mackenzie Delta	OaTi-1, Area 1, Feature 2	AD 1410 - 1800	Thule/Inuvialuit	Inuit	Unit N50, W54; Level 3b	Canis sp.	mandible	complete (p2, p4-m3)	R	adult		congenital absence of p1	Darwent, C.M.	Prince of Wales Northern Heritage Center	Betts, Matthew	2004	Betts 2008	p2, p4, m2, m3 sampled
OATI-1:H1R	NA			Brown, S.K. (VGL)	UC Davis	1/23/2013	Yes	Dog	A2a	TTAATCACCATGCCTCGAGAAACCATCAACCCTTGCTCGTAATGTCCCTCTTCTCGCTCCGGGCCCATACTAACGTGGGGGTTACTATCATGAAACTATACCTGGCATCTGGTTCTTACTTCAGGGCCATAACTTTATTTACTCCAATCCTACTAATTCTCGCAAATGGGACATCTCGATGGACTAATGACTAATCAGCCCATGATCACAC	Yes	4.5	A2a	NA	Northwest Territories	Tuktoyaktuk Peninsula, Mackenzie Delta	McKinley Bay, Tuktoyaktuk Peninsula, Mackenzie Delta	OaTi-1, House 1	AD 1410 - 1800	Thule/Inuvialuit	Inuit	Unit 2-4N, 0-1E; Level 5	Canis sp.	radius	prox + 3/4 shaft	R	adult			Darwent, C.M.	Prince of Wales Northern Heritage Center	Arnold, Charles D.	1991	Betts 2008	same size as comparative; shaft fragment collected
OATI-1:H1S	NA			Brown, S.K. (VGL)	UC Davis	1/31/2013	Yes	Wolf	Alaska2 (KF661066.1)	NNNNNNNNNNNNNNNNNNNNNNNNNNNNNNNNNNNNNNNNNNNNNNNNNNNNNNNNNNNNNNNNNNNNNNNNNNNNNNNNNNNNNNNNNNNNNNNNNNCCCTCCCCNTATGTACGTCGTGCATTAATGGTTTGCCCCATGCATATAAGCATGTACATAATATTATATTCTTACATAGGANCATATCAACTCAATCTCACAATTCATTGATCTATCAACAGTAATCAAATGCATATCACTTAGTCCAATAAGGGCTTAATCACCATGCCTCGAGAAACCATNNNCAACCCTTGCTCGTANATGTCCCTCTTCTCGCTCCGGGCCCATACTANACGTGGGGGTTACTATCATGAAACTATACCTGGCATCTGGNTTCTTACCTCAGGGCCANNNTNANACT…	Yes	2.6	NA	NA	Northwest Territories	Tuktoyaktuk Peninsula, Mackenzie Delta	McKinley Bay, Tuktoyaktuk Peninsula, Mackenzie Delta	OaTi-1, House 1	AD 1410 - 1800	Thule/Inuvialuit	Inuit	Unit 0-2N, 0-1E; 20-30 cm	Canis sp.	scapula	complete	R	adult			Darwent, C.M.	Prince of Wales Northern Heritage Center	Arnold, Charles D.	1991	Betts 2008	larger than compatative; spine + blade fragment collected
Obersten 2	Obersten 2			Sinding, M-H.S.	Copenhagen		Yes	Dog	NA	NA	Yes	22	NA	A1a	Greenland		Greenland		1911	Historical	Historical										The Ski Museum, Norway
ODÖ-DOG-108	NA			Brown, S.K. (VGL)	UC Davis	5/29/2014	Yes	Dog	Fail	NA	Yes	0.2	NA	NA	Iceland	Tuktoyaktuk Peninsula, Mackenzie Delta	Oddsstaðir, Vesturland	n/a	AD 1200 - 1300	Medieval Icelandic	Other	n/a	Canis sp.	vertebra	complete	n/a	adult			McGovern, Thomas H.	CUNY/ Zoological Museum Copenhagen	NABO			small-sized dog, imported?; late 13th - late 14th c. AD (radiocarbon)
OHRH-1:1426M1	NA			Brown, S.K. (VGL)	UC Davis	1/23/2013	Yes	Fail	Fail	NA	No	NA	NA	NA	Northwest Territories	Banks Island	Nelson River, Banks Island	OhRh-1	AD 1200 - 1300	early Thule	Inuit	Unit 4-6S, 4-6W; 40-50 cm	Canis sp.	lumbar	complete (x2)	n/a	adult		articulated	Darwent, C.M.	Prince of Wales Northern Heritage Center	Arnold, Charles D.	1980-81	Friesen & Arnold 2008	large-sized dog
OHRH-1:1426M2	NA			Brown, S.K. (VGL)	UC Davis	1/23/2013	Yes	Dog	Fail	NA	Yes	7.8; 9.5	A1b	NA	Northwest Territories	Banks Island	Nelson River, Banks Island	OhRh-1	AD 1200 - 1300	early Thule	Inuit	Unit 4-6S, 4-6W; 40-50 cm	Canis sp.	lumbar	complete	n/a	adult			Darwent, C.M.	Prince of Wales Northern Heritage Center	Arnold, Charles D.	1980-81	Friesen & Arnold 2008	small-sized dog
OJRL-3:534	NA			Brown, S.K. (VGL)	UC Davis	1/23/2013	Yes	Dog	A2b	GCTGAGATTCTTCTTAAACTATTCCCTGACACCCCTACATTCATATATTGAATCACCCCTACTGTGCTATGTCAGTATCTCCAGGTAAACCCTTCTCNCCCTCCCCNTATGTACGTCGTGCATTAATGGTTTGCCCCATGCATATAAGCATGTACATAATATTATATCCTTACATAGGANCATATTAACTCAATCTCATAGTTCACTGATCTATCAACAGTANNNNNNNNNNNNNNNNNNNNNNNNNNNNNNNNNNNNNNNNNNNNNNNNNNNNNNNNNNNNNNNNNNNNNNNNNNNNNNNNNNNNNNNNNNNNNNNNNNNNNNNNNNNNNNNNNNNNNNNNNNNNNNNNNNNNNNNNNCCTGGCATCTGGNTTCTTACTTCAGGGCCANNNTNANACT…	Yes	4.2	A2b	NA	Northwest Territories	Banks Island	Lagoon, Banks Island	OjRl-3	BC 825 - 200	early Dorset	Paleo-Inuit	982.50.534a, b, c	Canis sp.	lumbar	complete (x3)	n/a	old adult		osteoarthritis; compressed spinous processes)	Darwent, C.M.	Prince of Wales Northern Heritage Center	Arnold, Charles D.	1976-77	Arnold 1979
OKRN-1:TUR	NA			Brown, S.K. (VGL)	UC Davis	12/3/2013	Yes	Dog	A2a	GCTGAGATTCTTCTTNNNNNNNNNNNNNNNNNNNNNNNNNTCATATATTGAATCACCCCTACTGTGCTATGTCAGTATNNNNNNNNNNNNNCTTCTCNCCCTCCCCNTATGTACGTCGTGCATTAATGGTTTGCCCCATGCATATAAGCATGTACATAATATTATATCCTTACATAGGANCATATTAACTCAATCTCATAGTTCACTGATCTACCAACAGTAATCGAATGCATATCACTTAGTCCAATAAGGGCTTAATCACCATGCCTCGAGAAACCATNNNCAACCCTTGCTCGTANATGTCCCTCTTCTCGCTCCGGGCCCATACTANACGTGGGGGTTACTATCATGAAACTATACCTGGCATCTGGNTTCTTACTTCAGGGCCANNNTNANACT…	Yes	6	A2a	NA	Northwest Territories	Banks Island	Fish Lake, Banks Island	OkRh-1	AD 1600 - 1800	late Thule	Inuit	head of gully; test unit	Canis sp.	radius	complete	R	juvenile		unfused (dist epiph refit)	Darwent, C.M.	Prince of Wales Northern Heritage Center	Arnold, Charles D.	2009	not previously reported
OP-B1-M1	NA			Brown, S.K. (VGL)	UC Davis	7/31/2012	Yes	Dog	Fail	NA	No	NA	NA	NA	Alaska	Kobuk River	Onion Portage, Kobuk River	49-AMR-001, Band 1	AD 1025 - 1225	early Thule	Inuit	Unit S10, W44.90; Level 3-5	Canis sp.	mandible	complete (R: i2-m2; L: i2-m2)	R+L	adult (no wear)		congenital absence of p1	Darwent, C.M.	Haffenreffer Museum	Anderson, Douglas D./T.L.	6/1967	Anderson 1988	shellacked; P-1112, P-593A
OP-B1-M2	NA			Brown, S.K. (VGL)	UC Davis	7/31/2012	Yes	Wolf	Alaska2 (KF661066.1)	CTGAAATTCTTCTTAAACTATTCCCTGACACCCCTACATTCATATATTGAATCACCCCTACTGTGCTATGTCAGTATCTCCAGGTAAACCCTTCTTCCCTCCCCCTATGTACGTCGTGCATTAATGGTTTGCCCCATGCATATAAGCATGTACATAATATTATATTCTTACATAGGACATATTAACTCAATCTCATAATTCACTGATCTATCAGCAGTGATCAAATGCATATCACTTAGTCCAATAAGGGCTTAATCACCATGCCTCGAGAAACCATCAACCCTTGCTCGTAATGTCCCTCTTCTCGCTCCGGGCCCATACTAACGTGGGGGTTACTATCATGAAACTATACCTGGCATCTGGTTCTTACCTCAGGGCCATAGCTTTATTTACTCCAAT…	Yes	8.2	WOLF	NA	Alaska	Kobuk River	Onion Portage, Kobuk River	49-AMR-001, Band 1	AD 1025 - 1225	early Thule	Inuit	n/a	Canis sp.	mandible	P3 alveolus to gonial angle (p3-m2)	R	adult (no wear)		tooth surface chipped (post-mortem)	Darwent, C.M.	Haffenreffer Museum	Anderson, Douglas D./ J. Louis Giddings	1964-67	Anderson 1988	P-1112, P-593A
OP-H13-M1	NA			Brown, S.K. (VGL)	UC Davis	7/2/2012	No	Fail	Fail	NA	No	NA	NA	NA	Alaska	Kobuk River	Onion Portage, Kobuk River	49-AMR-001, House 13	AD 1025 - 1225	early Thule	Inuit	n/a	Canis sp.	mandible	complete (R: c, m1-2; L: c, p3, m1)	R+L	adult (no wear)		congenital absence of P1; m3 crypt in ascending ramus	Darwent, C.M.	Haffenreffer Museum	Anderson, Douglas D./ J. Louis Giddings	1964-67	Anderson 1988	P-1112
OP-H13-M2	NA			Brown, S.K. (VGL)	UC Davis	7/2/2012	Yes	Dog	A1b	ATGTACGTCGTGCATTAATGGTTTGCCCCATGCATATAAGCATGTACATAATATTATATCCTTACATAGGACATATTAACTCAATCTCATAGTTCACTGATCTATCAACAG-TAATCAAATGCATATCACTTAGTCCAATAAGGGCTTAATCACCATGCCTCGAGAAACCATCAACCCTTGCTCGTAATGTCCCTCTTCTCGCTCCGGGCCCATACTAACGTGGGGGTTACTATCATGAAACTATACCTGGCATCTGGTTCTTACTTCAGGGCCATAA-CTTTATTTACTCCAATCCTACTAATTCTCGCAAATGGGACATCTCGATGGACTAATGACTAATCAGCCCATGATCACA	Yes	0.7	NA	NA	Alaska	Kobuk River	Onion Portage, Kobuk River	49-AMR-001, House 13	AD 1025 - 1225	early Thule	Inuit	n/a	Canis sp.	mandible	complete (R: p4-m2; L: m1-2)	R+L	adult (slight wear)		congenital absence of P1; mottled burning on bone, tooth surfaces burned black	Darwent, C.M.	Haffenreffer Museum	Anderson, Douglas D./ J. Louis Giddings	1964-67	Anderson 1988	P-1112
OP-H13-M3	NA			Brown, S.K. (VGL)	UC Davis	7/2/2012	Yes	Dog	A2b	NNNNNNNNNNNNNNNNNNNNNNNNNNNNNNNNNNNNNNNNNNNNNNNNNNNNNNNNNNNNNNNNNNNNNNNNNNNNNNNNNNNNNNNNNNNNNNNNTNCCCTCCCCNTATGTACGTCGTGCATTAATGGTTTGCCCCATGCATATAAGCATGTACATAATATTATATCCTTACATAGGANCATATTAACTCAATCTCATAGTTCACTGATCTATCAACAGTAATCGAATGCATATCACTTAGTCCAATAAGGGCTTAATCACCATGCCTCGAGAAACCATNNNCAACCCTTGCTCGTANATGTCCCTCTTCTCGCTCCGGGCCCATACTANACGTGGGGGTTACTATCATGAAACTATACCTGGCATCTGGNTTCTTACTTCAGGGCCANNNTNANACT…	Yes	1.6	NA	NA	Alaska	Kobuk River	Onion Portage, Kobuk River	49-AMR-001, House 13	AD 1025 - 1225	early Thule	Inuit	n/a	Canis sp.	mandible	complete (R: p2-m2; L: c, p2-m2)	R+L	old adult (heavy wear)		congenital absence of P1; mottled burning on bone, occlusal surfaces burned black	Darwent, C.M.	Haffenreffer Museum	Anderson, Douglas D./ J. Louis Giddings	1964-67	Anderson 1988	P-1112
OP-H13-M4	NA			Brown, S.K. (VGL)	UC Davis	7/2/2012	Yes	Dog	A1b	GCTGAGATTCTTCTTNNNNNNNNNNNNNNNNNNNNNNNNNTCATATATTGAATCACCCCTACTGTGCTATGTCAGTATNNNNNNNNNNNNNCTTCTCNCCCTCCCCNTATGTACGTCGTGCATTAATGGTTTGCCCCATGCATATAAGCATGTACATAATATTATATCCTTACATAGGANCATATTAACTCAATCTCATAGTTCACTGATCTACCAACAGTAATCGAATGCATATCACTTAGTCCAATAAGGGCTTAATCACCATGCCTCGAGAAACCATNNNCAACCCTTGCTCGTANATGTCCCTCTTCTCGCTCCGGGCCCATACTANACGTGGGGGTTACTATCATGAAACTATACCTGGCATCTGGNTTCTTACTTCAGGGCCANNNTNANACT…	Yes	3.5	NA	NA	Alaska	Kobuk River	Onion Portage, Kobuk River	49-AMR-001, House 13	AD 1025 - 1225	early Thule	Inuit	n/a	Canis sp.	mandible	complete (R: m1-2; L: p4-m2)	R+L	adult (moderate wear)		congenital absence of P1; mottled burning on bone, occlusal surfaces burned black	Darwent, C.M.	Haffenreffer Museum	Anderson, Douglas D./ J. Louis Giddings	1964-67	Anderson 1988	P-1112
OP-H13-M5	NA			Brown, S.K. (VGL)	UC Davis	7/2/2012	Yes	Dog	Indeterminate	ATGTACGTCGGCATCATCGCCTGGAAGTTCATGCTGCAAAAGGACACCGGAGCGGTGAATCACTTCATCTATGACAACCTCCACCTGGGCGGTGACAAACCGTTCTGGCTGATCGGCGACAACTCCTTCGTCGCCGTCGTCGTGGTGGCGATCTGGAGGCTTTGGCCGTTCGCCTTCCTCATGCTGATGGCCGGACTCCAGTCCATACCGACGGACGTCTACGAAGCGTCCGCCGTTGACGGTGCCAAGCCCTTCCGGCAATGGCTTTCGATCACCATGCCTCGAGAAACCATCAACCCTTGCTCGTAATGTCCCTCTTCTCGCTCCGGGCCCATACTAACGTGGGGGTTACTATCATGAAACTATACCTGGCATCTGGTTCTTACTTCAGGGCCATAA…	Yes	1	INDETERMINATE	NA	Alaska	Kobuk River	Onion Portage, Kobuk River	49-AMR-001, House 13	AD 1025 - 1225	early Thule	Inuit	n/a	Canis sp.	mandible	complete (L: p3-m1) + body (Rp4-m1)	R+L	subadult?		congenital absence of P1 + P2; mottled burning on bone, occlusal surfaces burned black	Darwent, C.M.	Haffenreffer Museum	Anderson, Douglas D./ J. Louis Giddings	1964-67	Anderson 1988	P-1112
OP-H13-M6	NA			Brown, S.K. (VGL)	UC Davis	7/2/2012	No	Fail	Fail	NA	No	NA	NA	NA	Alaska	Kobuk River	Onion Portage, Kobuk River	49-AMR-001, House 13	AD 1025 - 1225	early Thule	Inuit	n/a	Canis sp.	mandible	complete (c, p2, p4-m3)	R	subadult (no wear)		m3 crypt in ascending ramus; mottled burning on bone and teeth	Darwent, C.M.	Haffenreffer Museum	Anderson, Douglas D./ J. Louis Giddings	1964-67	Anderson 1988	P-1112
P_H2/2013KMG-Nipisat-H2	NA	P_H2/2013KMG-Nipisat-H2		Brown, S.K. (VGL)	UC Davis	10/24/2013	No	Fail	Fail	NA	No	NA	NA	NA	Greenland	Qeqqata Municipality	Nipisat Island, Qeqqata Municipality	n/a	BC 2500 - 800	Saqqaq	Paleo-Inuit	ZMK 386/193; NII, lag 2	C. l. familiaris	humerus	complete	R	adult			Brown, S.K.	Zoological Museum Copenhagen	Kramer, Finn Erik	1989-94	Gotfredsen and Moberg 2004; Kramer 1996	ZMK-386/193: 42; bone drilled/powdered at Willerslev lab; no aDNA amplified
P_M2/2013KMG-Aftermiut-M2	NA	P_M2/2013KMG-Aftermiut-M2		Brown, S.K. (VGL)	UC Davis	10/24/2013	No	Fail	Fail	NA	No	NA	NA	NA	Greenland	Qaqortoq (Julianehaab)	Aftermiut, Qaqortoq (Julianehaab)	n/a		Thule	Inuit	ZMK 13/1934	Canis sp.	mandible	complete (p2, m1-2)	R	adult	M?	congenital absence of p1	Brown, S.K.	Zoological Museum Copenhagen	Mathiassen, Therkel, and Erik Holtved	1931	Mathiassen and Holtved 1936	bone drilled/powdered at Willerslev lab; no aDNA amplified
P_M6/2013KMG-Aftermiut-M6	NA	P_M6/2013KMG-Aftermiut-M6		Brown, S.K. (VGL)	UC Davis	10/24/2013	No	Fail	Fail	NA	No	NA	NA	NA	Greenland	Qaqortoq (Julianehaab)	Aftermiut, Qaqortoq (Julianehaab)	n/a		Thule	Inuit	ZMK 13/1934	Canis sp.	mandible	complete (p3, m1-2)	R	adult	F?	alveolar resorption of p1, p2, p4; cut mark down length of lateral surface	Brown, S.K.	Zoological Museum Copenhagen	Mathiassen, Therkel, and Erik Holtved	1931	Mathiassen and Holtved 1936	bone drilled/powdered at Willerslev lab; no aDNA amplified
P100/2013KMG-Inugsuk-C9	NA	P100/2013KMG-Inugsuk-C9		Brown, S.K. (VGL)	UC Davis	5/27/2014	No	Fail	Fail	NA	No	NA	NA	NA	Greenland	Upernivik District	Inugsuk, Upernivik District	n/a	AD 1200 - 1500	Thule	Inuit	ZMK 4/1930	C. l. familiaris	cranium	complete (R: P2-M2; L: P4-M2)	n/a	adult		congenital absence of P1; zygomatics broken; holes in nasal	Brown, S.K.	Zoological Museum Copenhagen	Mathiassen, Therkel	1930	Mathiassen 1930a, b (MoG 77)	Box (specimen 1-3); turbinates collected
P101/2013KMG-Inugsuk-C1	NA	P101/2013KMG-Inugsuk-C1		Brown, S.K. (VGL)	UC Davis	5/27/2014	Yes	Dog	A2a	GCTGAGATTCTTCTTAAACTATTCCCTGACACCCCTACATTCATATATTGAATCACCCCTACTGTGCTATGTCAGTATCTCCAGGTAAACCCTTCTCNCCCTCCCCNTATGTACGTCGTGCATTAATGGTTTGCCCCATGCATATAAGCATGTACATAATATTATATCCTTACATAGGANCATATTAACTCAATCTCATAGNNNNNNNNNNNNNNNNNNNNNNNNNNNNNNNNNNNNNNNNNNNNNNNNNNNNNNNNNNNNNNNNNNNNNNNNNNNNNNNNNNNNNNNNNNNNNNNNNNNNNNNNNNNNNNNNNNNNNNNNNNNNNNNNNNNNNNNNNNNNNNNNNNNNNNNNNNNNNNNNNNNNNNNNNNNNNNNNNNNNNNNNNNNNNNNNNNNNNN…	Yes	1.9	NA	NA	Greenland	Upernivik District	Inugsuk, Upernivik District	Midden (Moddingen) 12-14	AD 1200 - 1500	Thule	Inuit	ZMK 4/1930; h.r. C.N. 299	C. l. familiaris	cranium	complete (R: P4-M2; L: P3-M1)	n/a	adult (no wear)	M?	congenital absence of P1; L squamosal broken	Brown, S.K.	Zoological Museum Copenhagen	Mathiassen, Therkel	1930	Mathiassen 1930a, b (MoG 77)	Box (specimen 1-3); turbinates collected
P102/2013KMG-Inugsuk-C5	NA	P102/2013KMG-Inugsuk-C5		Brown, S.K. (VGL)	UC Davis	5/27/2014	No	Fail	Fail	NA	No	NA	NA	NA	Greenland	Upernivik District	Inugsuk, Upernivik District	Midden (Moddingen) 12-14	AD 1200 - 1500	Thule	Inuit	ZMK 4/1930	C. l. familiaris	cranium	complete (R: P2-M2; L: P4-M2)	n/a	adult (no wear)	F?	R+L squamosals broken; holes in R+L orbits	Brown, S.K.	Zoological Museum Copenhagen	Mathiassen, Therkel	1930	Mathiassen 1930a, b (MoG 77)	Box (specimen 1-3); turbinates collected
P103/2013KMG-Inugsuk-C8	NA	P103/2013KMG-Inugsuk-C8		Brown, S.K. (VGL)	UC Davis	5/27/2014	No	Fail	Fail	NA	No	NA	NA	NA	Greenland	Upernivik District	Inugsuk, Upernivik District	Midden (Moddingen) 12-14	AD 1200 - 1500	Thule	Inuit	ZMK 4/1930	C. l. familiaris	cranium	complete (R:P4 -M4; L: P2, P4-M3)	n/a	old adult (heavy wear)	?	R squamosal broken; sagittal crest cracked	Brown, S.K.	Zoological Museum Copenhagen	Mathiassen, Therkel	1930	Mathiassen 1930a, b (MoG 77)	Box (specimen 1-3); turbinates collected
P104/2013KMG-Inugsuk-C6	NA	P104/2013KMG-Inugsuk-C6		Brown, S.K. (VGL)	UC Davis	5/27/2014	No	Fail	Fail	NA	No	NA	NA	NA	Greenland	Upernivik District	Inugsuk, Upernivik District	Midden (Moddingen) 12-14	AD 1200 - 1500	Thule	Inuit	ZMK 4/1930	C. l. familiaris	cranium	complete (R: I2-3, C, P3-M2; L: P1-M2)	n/a	adult (no wear)	M?	hold in L frontal	Brown, S.K.	Zoological Museum Copenhagen	Mathiassen, Therkel	1930	Mathiassen 1930a, b (MoG 77)	Box (specimen 1-3); turbinates collected
P106/2013KMG-Inugsuk-C4	NA	P106/2013KMG-Inugsuk-C4		Brown, S.K. (VGL)	UC Davis	5/27/2014	Yes	Dog	Fail	NA	Yes	1.3	NA	NA	Greenland	Upernivik District	Inugsuk, Upernivik District	Midden (Moddingen) 12-14	AD 1200 - 1500	Thule	Inuit	ZMK 4/1930	C. l. familiaris	cranium	complete (R: P1-2, P4-M2; L: P1-4, M2)	n/a	adult (no wear)	?	R+L squamosals broken; hold above L orbit	Brown, S.K.	Zoological Museum Copenhagen	Mathiassen, Therkel	1930	Mathiassen 1930a, b (MoG 77)	Box (specimen 1-3); turbinates collected
P78/2013KMG-Aftermiut-M5	NA	P78/2013KMG-Aftermiut-M5		Brown, S.K. (VGL)	UC Davis	10/24/2013	No	Fail	Fail	NA	No	NA	NA	NA	Greenland	Qaqortoq (Julianehaab) District	Aftermiut, Qaqortoq (Julianehaab) District	n/a		Thule	Inuit	ZMK 13/1934	C. l. familiaris	mandible	complete	R		M?	n/a	Brown, S.K.	Zoological Museum Copenhagen		7/1936
P79/2013KMG-Aftermiut-M7	NA	P79/2013KMG-Aftermiut-M7		Brown, S.K. (VGL)	UC Davis	10/24/2013	No	Fail	Fail	NA	No	NA	NA	NA	Greenland	Qaqortoq (Julianehaab) District	Aftermiut, Qaqortoq (Julianehaab) District	n/a		Thule	Inuit	ZMK 13/1934	C. l. familiaris	mandible	complete	R			mandibular condyle broken	Brown, S.K.	Zoological Museum Copenhagen		7/1936
P80/2013KMG-Igloolik-F1	NA	P80/2013KMG-Igloolik-F1		Brown, S.K. (VGL)	UC Davis	12/16/2013	No	Fail	Fail	NA	No	NA	NA	NA	Nunavut	Igloolik Island	Tikilik, Igloolik Island	NiHf-4, unknown		Paleoeskimo	Paleo-Inuit	n/a	Canis sp.	femur	dist + 1/2 shaft		adult		n/a	Brown, S.K.	Zoological Museum Copenhagen	Meldgaard, Jorgen	1960s	not previously reported?
P81/2013KMG-Qaja-H1	NA	P81/2013KMG-Qaja-H1		Brown, S.K. (VGL)	UC Davis	12/16/2013	No	Fail	Fail	NA	No	NA	NA	NA	Greenland	Ilulisat Icefjord	Qajaa, Ilulisat Icefjord	n/a	BC 1975 - 925	Saqqaq	Paleo-Inuit	n/a	C. l. familiaris	humerus	complete	R	adult		n/a	Brown, S.K.	Zoological Museum Copenhagen	Meldgaard, Jorgen	1982	Mohl 1986
P82/2013KMG-QT-H1	NA	P82/2013KMG-QT-H1		Brown, S.K. (VGL)	UC Davis	12/16/2013	No	Fail	Fail	NA	No	NA	NA	NA	Greenland	Disko Bay	Qeqertasussuk, Disko Bay	Feature C		Saqqaq	Paleo-Inuit	ZMK 70/1983	Canis sp.	humerus	complete	L	adult		n/a	Brown, S.K.	Zoological Museum Copenhagen	Gronnow, Bjarne	1980s	Meldgaard 2004
P83/2013KMG-Qaja-T1	NA	P83/2013KMG-Qaja-T1		Brown, S.K. (VGL)	UC Davis	10/24/2013	Yes	Dog	Fail	NA	Yes	1.3	NA	NA	Greenland	Ilulisat Icefjord	Qajaa, Ilulisat Icefjord	n/a	BC 1975 - 925	Saqqaq	Paleo-Inuit	n/a	C. l. familiaris	tibia	complete	L	juvenile		n/a	Brown, S.K.	Zoological Museum Copenhagen	Meldgaard, Jorgen	1982	Mohl 1986
P84/2013KMG-QT-T1	NA	P84/2013KMG-QT-T1		Brown, S.K. (VGL)	UC Davis	10/24/2013	No	Fail	Fail	NA	No	NA	NA	NA	Greenland	Disko Bay	Qeqertasussuk, Disko Bay	Feature B		Saqqaq	Paleo-Inuit	ZMK 70/1983	Canis sp.	tibia	complete	L	adult		n/a	Brown, S.K.	Zoological Museum Copenhagen	Gronnow, Bjarne	1980s	Meldgaard 2004
P85/2013KMG-QT-H2	NA	P85/2013KMG-QT-H2		Brown, S.K. (VGL)	UC Davis	10/24/2013	Yes	INDET	Fail	NA	Yes	1.1	NA	NA	Greenland	Disko Bay	Qeqertasussuk, Disko Bay	Feature C		Saqqaq	Paleo-Inuit	ZMK 70/1983	Canis sp.	humerus	complete		juvenile?		n/a	Brown, S.K.	Zoological Museum Copenhagen	Gronnow, Bjarne	1980s	Meldgaard 2004
P86/2013KMG-Nipisat-H1	NA	P86/2013KMG-Nipisat-H1		Brown, S.K. (VGL)	UC Davis	10/24/2013	Yes	Dog	Fail	NA	Yes	2.6	NA	NA	Greenland	Qeqqata Municipality	Nipisat Island, Qeqqata Municipality	n/a	BC 2500 - 800	Saqqaq	Paleo-Inuit	ZMK 136/1989	Canis sp.	humerus	distal + 1/4 shaft	L	adult		n/a	Brown, S.K.	Zoological Museum Copenhagen	Moberg, Tina	1990s	Gotfredsen and Moberg 2004; Kramer 1996
P87/2013KMG-Igloolik-F2	NA	P87/2013KMG-Igloolik-F2		Brown, S.K. (VGL)	UC Davis	12/16/2013	No	Fail	Fail	NA	No	NA	NA	NA	Nunavut	Igloolik Island	Tikilik, Igloolik Island	NiHf-4		Paleoeskimo	Paleo-Inuit	n/a	Canis sp.	femur	complete		adult		n/a	Brown, S.K.	Zoological Museum Copenhagen		1930s	not previously reported?
P88/2013KMG-GeoSociety-M6	NA	P88/2013KMG-GeoSociety-M6		Brown, S.K. (VGL)	UC Davis	12/16/2013	No	Fail	Fail	NA	No	NA	NA	NA	Greenland	East Greenland	Geographical Society Island, East Greenland	n/a	AD 1500 - 1800	Thule	Inuit	ZMK 17/1933	Canis sp.	mandible	complete	R	adult		n/a	Brown, S.K.	Zoological Museum Copenhagen		1930s	not previously reported?
P89/2013KMG-GeoSociety-M5	NA	P89/2013KMG-GeoSociety-M5		Brown, S.K. (VGL)	UC Davis	5/27/2014	Yes	Fail	Fail	NA	Yes	0.2	NA	NA	Greenland	East Greenland	Geographical Society Island, East Greenland	n/a	AD 1500 - 1800	Thule	Inuit	ZMK 17/1933	Canis sp.	mandible	complete	R+L	adult		n/a	Brown, S.K.	Zoological Museum Copenhagen		1930s	not previously reported?
P90/2013KMG-GeoSociety-M7	NA	P90/2013KMG-GeoSociety-M7		Brown, S.K. (VGL)	UC Davis	12/16/2013	No	Fail	Fail	NA	No	NA	NA	NA	Greenland	East Greenland	Geographical Society Island, East Greenland	n/a	AD 1500 - 1800	Thule	Inuit	ZMK 17/1933	Canis sp.	mandible	complete	R	adult		mandibular condyle/coronoid process broken off	Brown, S.K.	Zoological Museum Copenhagen		1930s	not previously reported?
P91/2013KMG-GeoSociety-M4	NA	P91/2013KMG-GeoSociety-M4		Brown, S.K. (VGL)	UC Davis	5/27/2014	Yes	Dog	A2a	GCTGAGATTCTTCTTAAACTATTCCCTGACACCCCTACATTCATATATTGAATCACCCCTACTGTGCTATGTCAGTATCTCCAGGTAAACCCTTCTCNCCCTCCCCNTATGTACGTCGTGCATTAATGGTTTGCCCCATGCATATAAGCATGTACATAATATTATATCCTTACATAGGANCATATTAACTCAATCTCATAGTTCACTGATCTACCAACAGTAATCGAATGCATATCACTTAGTCCAATAAGGGCTTAATCACCATGCCTCGAGAAACCATNNNCAACCCTTGCTCGTANATGTCCCTCTTCTCGCTCCGGGCCCATACTANACGTGGGGGTTACTATCATGAAACTATACCTGGCATCTGGNTTCTTACTTCAGGGCCANNNTNANACT…	Yes	0.8; 6.1	A2a	NA	Greenland	East Greenland	Geographical Society Island, East Greenland	n/a	AD 1500 - 1800	Thule	Inuit	ZMK 17/1933	Canis sp.	mandible	complete	R+L	adult		n/a	Brown, S.K.	Zoological Museum Copenhagen		1930s	not previously reported?
P92/2013KMG-GeoSociety-M2	NA	P92/2013KMG-GeoSociety-M2		Brown, S.K. (VGL)	UC Davis	5/27/2014	Yes	Dog	Fail	NA	Yes	1.6	NA	NA	Greenland	East Greenland	Geographical Society Island, East Greenland	n/a	AD 1500 - 1800	Thule	Inuit	ZMK 17/1933	Canis sp.	mandible	complete	R+L	adult		n/a	Brown, S.K.	Zoological Museum Copenhagen		1930s	not previously reported?
P93/2013KMG-GeoSociety-M1	NA	P93/2013KMG-GeoSociety-M1		Brown, S.K. (VGL)	UC Davis	5/27/2014	Yes	Dog	A2a	NNNNNNNNNNNNNNNNNNNNNNNNNNNNNNNNNNNNNNNNNNNNNNNNNNNNNNNNNNNNNNNNNNNNNNNNNNNNNNNNNNNNNNNNNNNNNNNNNNNNNNNNNCNTATGTACGTCGTGCATTAATGGTTTGCCCCATGCATATAAGCATGTACATAATATTATATCCTTACATAGGANCATATTAACTCAATCTCATAGTTCACTGATCTACCAACAGTAATCGAATGCATATCACTTAGTCCAATAAGGGCTTAATCACCATGCCTCGAGAAACCATNNNCAACCCTTGCTCGTANATGTNCCTCTTNTCGCTNCGGGCCCATACTANACGTGGGGGTTACTATCATGAAACTATACCTGGCATCTGGTTTCTTACTTCAGGGCCANNNTNANACT…	Yes	1	A2a	NA	Greenland	East Greenland	Geographical Society Island, East Greenland	n/a	AD 1500 - 1800	Thule	Inuit	ZMK 17/1933	Canis sp.	mandible	complete	R	adult		n/a	Brown, S.K.	Zoological Museum Copenhagen		1930s	not previously reported?
P94/2013KMG-GeoSociety-M3	NA	P94/2013KMG-GeoSociety-M3		Brown, S.K. (VGL)	UC Davis	12/16/2013	No	Fail	Fail	NA	No	NA	NA	NA	Greenland	East Greenland	Geographical Society Island, East Greenland	n/a	AD 1500 - 1800	Thule	Inuit	ZMK 17/1933	Canis sp.	mandible	complete	R+L	adult		n/a	Brown, S.K.	Zoological Museum Copenhagen		1930s	not previously reported?
P95/2013KMG-Aftermiut-M1	NA	P95/2013KMG-Aftermiut-M1		Brown, S.K. (VGL)	UC Davis	12/16/2013	No	Fail	Fail	NA	No	NA	NA	NA	Greenland	Qaqortoq (Julianehaab)	Aftermiut, Qaqortoq (Julianehaab)	n/a	AD 1500 - 1800	Thule	Inuit	ZMK 13/1934	Canis sp.	mandible	complete	L	juvenile		mandibular condyle/coronoid process broken off	Brown, S.K.	Zoological Museum Copenhagen		1930s	not previously reported?
P96/2013KMG-C.Krusenstern-A1	NA	P96/2013KMG-C.Krusenstern-A1		Brown, S.K. (VGL)	UC Davis	10/24/2013	Yes	Dog	Fail	NA	Yes	1.6	NA	NA	Alaska	Cape Krusenstern	Old Whaling, Cape Krusenstern	49-NOA-002	BC 1150 - 850	Old Whaling	Paleo-Inuit	n/a	Canis sp.	astragalus	complete	R+L	adult		n/a	Brown, S.K.	Zoological Museum Copenhagen	Giddings, J. Louis	1960-61	Giddings & Anderson 1986
P97/2013KMG-Deering-H1	NA	P97/2013KMG-Deering-H1		Brown, S.K. (VGL)	UC Davis	5/27/2014	Yes	Dog	A2b	NCTGAGATTCTTCTTAAACTATTNNNNNNNNNNNNNNNNNNNNNNNNNNNNNNNNNNNNNNNNNNNNNNNNNNNNNNNNNNNNNNNNNNNNNNNNNNNCCCTCCCCNTATGTACGTCGTGCATTAATGGTTTGCCCCATGCATATAAGCATGTACATAATATTATATCCTTACATAGGANCATATTAACTCAATCTCATAATTCACTGATCTATCAACAGTAATCGAATGCATATCACTTAGTCCAATAAGGGCTTAATCACCATGCCTCGAGAAACCATNNNCAACCCTTGCTCGTANATGTCCCTCTTCTCGCTCCGGGCCCATACTANACGTGGGGGTTACTATCATGAAACTATACCTGGCATCTGGNTTCTTACTTCAGGGCCANNNTNANACT…	Yes	0.50; 3.1	A2b	NA	Alaska	Kotzebue Sound	Deering, Kotzebue Sound	49-KTZ-023, House 1	AD 550 - 970	Thule	Inuit	qarigi (ceremonial house)	Canis sp.	humerus	complete		juvenile		n/a	Brown, S.K.	Zoological Museum Copenhagen	Larsen, Helge	1949	Larsen 2001
P98/2013KMG-Deering-C2	NA	P98/2013KMG-Deering-C2		Brown, S.K. (VGL)	UC Davis	10/24/2013	No	Fail	Fail	NA	Yes	1	NA	NA	Alaska	Kotzebue Sound	Deering, Kotzebue Sound	49-KTZ-023, House 1	AD 550 - 970	Thule	Paleo-Inuit	qarigi (ceremonial house)	Canis sp.	cranium	complete (all teeth)		adult	M	n/a	Brown, S.K.	Zoological Museum Copenhagen	Larsen, Helge	1949	Larsen 2001	bone drilled/powdered at Willerslev lab; aDNA amplified
P99/2013KMG-Deering-C3	NA	P99/2013KMG-Deering-C3		Brown, S.K. (VGL)	UC Davis	12/16/2013	Yes	Dog	A1b	NNNNNNNNNNNNNNNNNNNNNNNNNNNNNNNNNNNNNNNNNNNNNNNNNNNNNNNNNNNNNNNNNNNNNNNNNNNNNNNNNNNNNNNNNNNNNNNNNNCCCTCCCCNTATGTACGTCGTGCATTAATGGTTTGCCCCATGCATATAAGCATGTACATAATATTATATCCTTACATAGGANCATATTAACTCAATCTCATAGTTCACTGATCTATCAACAGTAATCAAATGCATATCACTTAGTCCAATAAGGGCTTAATCACCATGCCTCGAGAAACNNNNNNNNNNNNNNNNNNNNNNNNNNNNNNNNNNNNNNNNNNNNNNNNNNNNNNNNNNNNNNNNNNNNNNNNNNNNNNNNNNNNNNNNNNNNNNNNNNNNNNNNNNNNNNNNNNNNNNNNNN…	Yes	2.1	NA	NA	Alaska	Kotzebue Sound	Deering, Kotzebue Sound	49-KTZ-023, House 1	AD 550 - 970	Thule	Inuit	qarigi (ceremonial house)	Canis sp.	cranium	complete		adult		n/a	Brown, S.K.	Zoological Museum Copenhagen	Mathiassen, Ttherkel	1930	Mathiassen 1930a, b (MoG 77)
PCJQ-5:H5-M1	NA			Brown, S.K. (VGL)	UC Davis	12/9/2013	No	Fail	Fail	NA	No	NA	NA	NA	Nunavut	Creswell Bay, Somerset Island	Cape Garry, Creswell Bay, Somerset Island	PcJq-5, House 5	AD 1300 - 1440	Thule	Inuit	sod entrance	Canis sp.	mandible	complete (c-m3)	R	adult (no wear)	M?	congenital absence of p1; fine cut marks below p2-3; tissue adhering	Brown, S.K.	Canadian Museum of History	McCartney, Allen P.	1976	Rick 1980	AS# 273; caribou bone radiocarbon dated
PCJQ-5:H5-M3	NA			Brown, S.K. (VGL)	UC Davis	9/4/2013	Yes	Fail	Fail	NA	No	NA	NA	NA	Nunavut	Creswell Bay, Somerset Island	Cape Garry, Creswell Bay, Somerset Island	PcJq-5, House 5	AD 1300 - 1440	Thule	Inuit	sod entrance	Canis sp.	mandible	complete (p2-m2)	R	adult (no wear)	M?	congenital absence of p1; coronoid broken	Brown, S.K.	Canadian Museum of History	McCartney, Allen P.	1976	Rick 1980	AS# 250; caribou bone radiocarbon dated
PCJQ-5:H6-M1	NA			Brown, S.K. (VGL)	UC Davis	9/4/2013	Yes	Dog	A2a	NNNNNNNNNNNNNNNNNNNNNNNNNNNNNNNNNNNNNNNNNNNNNNNNNNNNNNNNNNNNNNNNNNNNNNNNNNNNNNNNNNNNNNNNNNNNNNNNNNNNNTCCCCNTATGTACGTCGTGCATTAATGGTTTGCCCCATGCATATAAGCATGTACATAATATTATATCCTTACATAGGANCATATTAACTCAATCTCATAGTTCACTGATCTACCAACAGTAATCGAATGCATATCACTTAGTCCAATAAGGGCTTAATCACCATGCCTCGAGAAACCATNNNCAACCCTTGCTCGTANATGTCCCTCTTCTCGCTCCGGGCCCATACTANACGTGGGGGTTACTATCATGAAACTATACCTGGCATCTGGNTTCTTACTTCAGGGCCANNNTNANACT…	Yes	0.4	NA	NA	Nunavut	Creswell Bay, Somerset Island	Cape Garry, Creswell Bay, Somerset Island	PcJq-5, House 6	AD 1300 - 1450	Thule	Inuit	n/a	Canis sp.	mandible	complete (p3-m3)	L	adult (moderate wear)		congenital absence of p1; p2 alveolus resorbed; burn marks	Brown, S.K.	Canadian Museum of History	McCartney, Allen P.	1976	Rick 1980	AS #680; S346; caribou bone radiocarbon dated
PCJQ-5:H6-M2	NA			Brown, S.K. (VGL)	UC Davis	12/9/2013	Yes	Dog	Fail	NA	Yes	2.1	NA	NA	Nunavut	Creswell Bay, Somerset Island	Cape Garry, Creswell Bay, Somerset Island	PcJq-5, House 6	AD 1300 - 1450	Thule	Inuit	n/a	Canis sp.	mandible	complete (p2-m2)	L	adult (moderate wear)		congenital absence of p1; broken coronoid/condyle	Brown, S.K.	Canadian Museum of History	McCartney, Allen P.	1976	Rick 1980	AS #680; S346; caribou bone radiocarbon dated
PCJQ-5:H6-M3	NA			Brown, S.K. (VGL)	UC Davis	9/4/2013	No	Fail	Fail	NA	No	NA	NA	NA	Nunavut	Creswell Bay, Somerset Island	Cape Garry, Creswell Bay, Somerset Island	PcJq-5, House 6	AD 1300 - 1450	Thule	Inuit	n/a	Canis sp.	mandible	distal 3/4 (p2-m2)	L	adult (heavy wear)	M	p1 indeterminate; mesial 1/4 broken off, spiral fracture; cut marks	Brown, S.K.	Canadian Museum of History	McCartney, Allen P.	1976	Rick 1980	AS #680; S124; caribou bone radiocarbon dated
PCJQ-5:H6-M4	NA			Brown, S.K. (VGL)	UC Davis	12/9/2013	Yes	Dog	Fail	NA	Yes	0.7	NA	NA	Nunavut	Creswell Bay, Somerset Island	Cape Garry, Creswell Bay, Somerset Island	PcJq-5, House 6	AD 1300 - 1450	Thule	Inuit	n/a	Canis sp.	mandible	distal 3/4 (p2-m2)	L	adult (no wear)	M	congenital absence of p1	Brown, S.K.	Canadian Museum of History	McCartney, Allen P.	1976	Rick 1980	AS #680; S80; caribou bone radiocarbon dated
PCJQ-5:H6-M6	NA			Brown, S.K. (VGL)	UC Davis	9/4/2013	Yes	Dog	A2a	GCTGARATTCTTCTTAAACTATTCCCTGACACCCCTACATTCATATATTGAATCACCCCTACTGTGCTATGTCAGTATCTCCAGGTAAACCCTTCTYNCCCTCCCCNTATGTACGTCGTGCATTAATGGTTTGCCCCATGCATATAAGCATGTACATAATATTATATCCTTACATAGGANCATATTAACTCAATCTCATAGTTCACTGATCTACCAACAGTAATCGAATGCATATCACTTAGTCCAATAAGGGCTTAATCACCATGCCTCGAGAAACAANNNNNNNNNNNNNNNNNNNNNNNNNNNNNNNNNNNNNNNNNNNNNNNNNNNNNNNNNNNNNNNNNNNNNNNNNNNNNNNNCCTGGCATCTGGNTTCTTACCTCAGGGCCANNNTNANACT…	Yes	4.2	NA	NA	Nunavut	Creswell Bay, Somerset Island	Cape Garry, Creswell Bay, Somerset Island	PcJq-5, House 6	AD 1300 - 1450	Thule	Inuit	n/a	Canis sp.	mandible	horizontal ramus (p4-m1)	L	adult (no wear)		congenital absence of p1-2; spiral fracture to body	Brown, S.K.	Canadian Museum of History	McCartney, Allen P.	1976	Rick 1980	S248; caribou bone radiocarbon dated
PEJR-1:H1-5201	NA			Brown, S.K. (VGL)	UC Davis	8/15/2013	Yes	Dog	Fail	NA	Yes	3.7	NA	NA	Nunavut	Creswell Bay, Somerset Island	Learmonth, Creswell Bay, Somerset Island	PeJr-1, House 1	AD 1150 - 1420	Thule	Inuit	n/a	Canis sp.	humerus	complete	R	adult		prox end slight carnivore gnawing	Brown, S.K.	Canadian Museum of History	McCartney, Allen P.	1976	Rick 1980	AS# 679; CAT# 5201; caribou bone radiocarbon dated
PEJR-1:H5-M2	NA			Brown, S.K. (VGL)	UC Davis	3/5/2013	Yes	Wolf	Fail	NA	Yes	4.9	WOLF	NA	Nunavut	Creswell Bay, Somerset Island	Learmonth, Creswell Bay, Somerset Island	PeJr-1, House 5	AD 1150 - 1420	Thule	Inuit	C-3; inside house sod	Canis sp.	mandible	horizontal ramus (m1-2)	L	adult (no wear)		spiral fracture at gonial angle	Brown, S.K.	Canadian Museum of History	McCartney, Allen P.	7/1976	Rick 1980	AS# 262; caribou bone radiocarbon dated
PEJR-1:H5-M3	NA			Brown, S.K. (VGL)	UC Davis	3/5/2013	Yes	Dog	Fail	NA	Yes	4.7	NA	NA	Nunavut	Creswell Bay, Somerset Island	Learmonth, Creswell Bay, Somerset Island	PeJr-1, House 5	AD 1150 - 1420	Thule	Inuit	B3; floor fill	Canis sp.	mandible	complete (p2-m2)	L	adult (no wear)		congenital absence of p1	Brown, S.K.	Canadian Museum of History	McCartney, Allen P.	8/1976	Rick 1980	AS# 262; caribou bone radiocarbon dated
PEJR-1:H5-M4	NA			Brown, S.K. (VGL)	UC Davis	3/5/2013	Yes	Fail	Fail	NA	Yes	2.6	NA	NA	Nunavut	Creswell Bay, Somerset Island	Learmonth, Creswell Bay, Somerset Island	PeJr-1, House 5	AD 1150 - 1420	Thule	Inuit	C-3; inside house sod	Canis sp.	mandible	complete (p4-m1)	L	adult (no wear)		coronoid broken	Brown, S.K.	Canadian Museum of History	McCartney, Allen P.	1976	Rick 1980	AS# 262; caribou bone radiocarbon dated
PGHB-1:1535	NA			Brown, S.K. (VGL)	UC Davis	2/19/2013	No	Fail	Fail	NA	No	NA	NA	NA	Nunavut	Navy Board Inlet, Baffin Island	Nunguvik, Navy Board Inlet, Baffin Island	PgHb-1		Paleoeskimo?	Paleo-Inuit	n/a	Canis sp.	cranium	complete (no teeth)	n/a	adult	F	R p1 alveolus resorbed; puncture to L frontal; R zygomatic broken off	Brown, S.K.	Canadian Museum of History	Mary-Rouseliere, Guy
QKHN-13:1654	NA			Brown, S.K. (VGL)	UC Davis	2/19/2013	Yes	Wolf	Fail	NA	Yes	0.4	NA	NA	Nunavut	Truelove Lowlands, Devon Island	Icebreaker Beach Complex, Truelove Lowlands, Devon Island	QkHn-13, Feature 15	BC 2500 - 1900	early Predorset	Paleo-Inuit	Unit 91N, 129E; NE	Canis sp.	humerus	distal + 3/4 shaft	R	adult		spiral fracture with impact scar at midshaft	Brown, S.K.	Canadian Museum of History	Helmer, James W.	1982-87	Helmer 1991; Helmer and McCartney 1989	AS# 1135; two specimens refit at midshaft (#1654 + 1861)
RBJR-1:1042.27	NA			Brown, S.K. (VGL)	UC Davis	10/29/2013	Yes	Dog	A2a	NNNNNNNNNNNNNNNNNNNNNNNNNNNNNNNNNNNNNNNNNNNNNNNNNNNNNNNNNNNNNNNNNNNNNNNNNNNNNNNNNNNNNNNNNNNNNNNNNNCCCTCCCCNTATGTACGTCGTGCATTAATGGTTTGCCCCATGCATATAAGCATGTACATAATATTATATCCTTACATAGGANCATATTAACTCAATCTCATAGTTCACTGATCTACCAACAGTAATCGAATGCATATCACTTAGTCCAATAAGGGCTTAATCACCATGCCTCGAGAAACCATNNNCAACCCTTGCTCGTANATGTCCCTCTTCTCGCTCCGGGCCCATACTANACGTGGGGGTTACTATCATGAAACTATACCTGGCATCTGGNTTCTTACTTCAGGGCCANNNTNANACT…	Yes	1	NA	NA	Nunavut	Grinnell Peninsula, Devon Island	Porden Point, Grinnell Peninsula, Devon Island	RbJr-1	AD 1200 - 1400	Thule	Inuit	n/a	Canis sp.	cranium	maxilla, no nasals (I1-M2)	n/a	adult (slight wear)		congenital absence of P1; carnivore gnawing of maxilla/frontal	Brown, S.K.	Canadian Museum of History	McGhee, Robert	early 1970s	Park 1984, 1987, 1997	CAT# 1042.27; associated with 1042.10, R+L mandibles (body, I3-M2; spiral fracture at m3)
RBJR-1:1042.47	NA			Brown, S.K. (VGL)	UC Davis	2/24/2013	Yes	Dog	A2a	GCTGAGATTCTTCTTAAACTATTCCCTGACACCCCTACATTCATATATTGAATCACCCCTACTGTGCTATGTCAGTATCTCCAGGTAAACCCTTCTCNCCCTCCCCNTATGTACGTCGTGCATTAATGGTTTGCCCCATGCATATAAGCATGTACATAATATTATATTCTTACATAGGANCATATTAACTCAATCTCATAGTTCACTGATCTACCAGCAGTAATCAAATGCATATCACTTAGTCCAATAAGGGCTTAATCACCATGCCTCGAGAAACCATNNNCAACCCTTGCTCGTANATGTCCCTCTTCTCGCTCCGGGCCCATACTANACGTGGGGGTTACTATCATGAAACTATACCTGGCATCTGGNTTCTTACTTCAGGGCCANNNTNANACT…	No	NA	NA	NA	Nunavut	Grinnell Peninsula, Devon Island	Porden Point, Grinnell Peninsula, Devon Island	RbJr-1	AD 1200 - 1400	Thule	Inuit	n/a	Canis sp.	cranium	maxilla (P2-M2)	n/a	adult (no wear)	M?	congenital absence of P1; carnivore damage to basicranium/frontal/nasal opening	Brown, S.K.	Canadian Museum of History	McGhee, Robert	early 1970s	Park 1984, 1987, 1997	CAT# 1042.47; associated with R+L mandibles (R body, L complete), carnivore gnawed
RBJR-1:642.56	NA			Brown, S.K. (VGL)	UC Davis	2/24/2013	Yes	Dog	A2a	CTGAGATTCTTCTTAAACTATTCCCTGACACCCCTACATTCATATATTGAATCACCCCTACTGTGCTATGTCAGTATCTCCAGGTAAACCCTTCTCCCCTCCCCTATGTACGTCGTGCATTAATGGTTTGCCCCATGCATATAAGCATGTACATAATATTATATCCTTACATAGGACATATTAACTCAATCTCATAGTTCACTGATCTACCAACAGTAATCGAATGCATATCACTTAGTCCAATAAGGGCTTAATCACCATGCCTCGAGAAACCATCAACCCTTGCTCGTAATGTCCCTCTTCTCGCTCCGGGCCCATACTAACGTGGGGGTTACTATCATGAAACTATACCTGGCATCTGGTTCTTACTTCAGGGCCATAACTTTATTTACTCCAATC…	Yes	20.4	A2a	NA	Nunavut	Grinnell Peninsula, Devon Island	Porden Point, Grinnell Peninsula, Devon Island	RbJr-1	AD 1200 - 1400	Thule	Inuit	n/a	Canis sp.	cranium	complete (incisors to M2)	n/a	adult (worn)	M	congenital absence of R P1; fracture/hole on L frontal; canine chipped/worn with open pulp cavity; prominent sagital/nuchal crest with carnivore gnawing	Brown, S.K.	Canadian Museum of History	McGhee, Robert	early 1970s	Park 1984, 1987, 1997	CAT# 642.56; associated with R+L mandibles (complete with teeth)
RBJR-4:222.21	NA			Brown, S.K. (VGL)	UC Davis	12/9/2013	No	Fail	Fail	NA	No	NA	NA	A2a	Nunavut	Grinnell Peninsula, Devon Island	Porden Point, Grinnell Peninsula, Devon Island	RbJr-4	AD 1200 - 1400	Thule	Inuit	n/a	Canis sp.	cranium	complete (all teeth)	n/a	adult (slight wear)		congenital absence of P1; healed depressed fracture with superimposed unhealed fracture on L frontal; L parietal/zygomatic missing (likely from blow to skull)	Brown, S.K.	Canadian Museum of History	McGhee, Robert	early 1970s	Park 1984, 1987, 1997	CAT# 222.21; associated with 222.29a, R mandible (complete, C-M2) and 222.30a, L mandible (complete C-M2); congenital absence of p1
RBJR-4:222.34	NA			Brown, S.K. (VGL)	UC Davis	12/9/2013	Yes	Dog	A2a	NNNNNNNNNNNNNNNNNNNNNNNNNNNNNNNNNNNNNNNNNNNNNNNNNNNNNNNNNNNNNNNNNNNNNNNNNNNNNNNNNNNNNNNNNNNNNNNNNNNNNNNNNNNNNNNNNNNNNNNNNNNNNNNNNNNNNNNNNNNNNNNNNNNNNNNNNNNNNNNNNNNNNNNNNNNNNNNNNNNNNNNNNNNNNNNNNNNNNNNNNNNNNNNNNNNNNNNNNNNNNNNNNNNNNNNNNNNNNNNNNNNNNNNNNNNNNCTTAATCACCATGCCTCGAGAAACCATNNNCAACCCTTGCTCGTANATGTCCCTCTTCTCGCTCCGGGCCCATACTANACGTGGGGGTTACTATCATGAAACTATACCTGGCATCTGGNTTCTTACTTCAGGGCCANNNTNANACT…	Yes	0.4	NA	NA	Nunavut	Grinnell Peninsula, Devon Island	Porden Point, Grinnell Peninsula, Devon Island	RbJr-4	AD 1200 - 1400	Thule	Inuit	n/a	Canis sp.	mandible	body (m1-m2)	R	adult (no wear)		carnivore gnawed on both ends of body (p3 and m3 alveoli)	Brown, S.K.	Canadian Museum of History	McGhee, Robert	early 1970s	Park 1984, 1987, 1997	CAT# 222.34
RBJR-4:336.19	NA			Brown, S.K. (VGL)	UC Davis	12/9/2013	Yes	Dog	A1b	NNNNNNNNNNNNNNNNNNNNNNNNNNNNNNNNNNNNNNNNNNNNNNNNNNNNNNNNNNNNNNNNNNNNNNNNNNNNNNNNNNNNNNNNNNNNNNNNNNNNNNNNNNNNNNNNNNNNNNNNNNNNNNNNNNNNNNNNNNNNNNNNNNNNNNNNNNNNNNNNNNNNNNNNNNNNNNNNNNNNNNNNNNNNNNNNNNNNNNNNNNNNNNNNNNNNNNNNNNNNNNNNNNNNNNNNNNNNNNNNNNNNNNNNNNNNTCTTAATCACCATGCCTCGAGAAACCATNNNCAACCCTTGCTCGTANATGTCCCTCTTCTCGCTCCGGGCCCATACTANACGTGGGGGTTACTATCATGAAACTATACCTGGCATCTGGNTTCTTACTTCAGGGCCANNNTNANACT…	Yes	1.1	NA	NA	Nunavut	Grinnell Peninsula, Devon Island	Porden Point, Grinnell Peninsula, Devon Island	RbJr-4	AD 1200 - 1400	Thule	Inuit	n/a	Canis sp.	mandible	body (p2-m1)	R	adult (heavy wear)		congenital absence of p1; canine broken at cingulum and worn; alveolar resorption of incisors; mesial 1/2 of p4 broken and worn with absess at root; spiral fracture at gonial angle	Brown, S.K.	Canadian Museum of History	McGhee, Robert	early 1970s	Park 1984, 1987, 1997	CAT# 336.19; associated with L mandible (body), congenital absence of p1, canine broken near cingulum and worn, spiral fracture at gonial angle
RBJR-5:99.1A	NA			Brown, S.K. (VGL)	UC Davis	12/9/2013	Yes	Dog	A2a	NNNNNNNNNNNNNNNNNNNNNNNNNNNNNNNNNNNNNNNNNNNNNNNNNNNNNNNNNNNNNNNNNNNNNNNNNNNNNNNNNNNNNNNNNNNNNNNNNNNNNNNNNNNNNNNNNNNNNNNNNNNNNNNNNNNNNNNNNNNNNNNNNNNNNNNNNNNNNNNNNNNNNNNNNNNNNNNNNNNNNNNNNNNNNNNNNNNNNNNNNNNNNNNNNNNNNNNNNNNNNNNNNNNNNNNNNNNNNNNNNNNNNNNNNNNNTCTTAATCACCATGCCTCGAGAAACCATNNNCAACCCTTGCTCGTANATGTCCCTCTTCTCGCTCCGGGCCCATACTANACGTGGGGGTTACTATCATGAAACTATACCTGGCATCTGGNTTATTACTTCAGGGCCANNNTNANACT…	Yes	0.9; 0.6	NA	NA	Nunavut	Grinnell Peninsula, Devon Island	Porden Point, Grinnell Peninsula, Devon Island	RbJr-5	AD 1200 - 1400	Thule	Inuit	n/a	Canis sp.	cranium	maxilla, no nasals (R: P4-M1; L:P3-M1)	n/a	adult (no wear)		mesial tip glued on to maxilla (R. Park)	Brown, S.K.	Canadian Museum of History	McGhee, Robert	early 1970s	Park 1984, 1987, 1997	CAT# 99.1A; associated with R+L mandibles (complete with teeth), congenital absence of p1, gnawing on R gonial angle
RBJR-5:99.1B	NA			Brown, S.K. (VGL)	UC Davis	12/9/2013	Yes	Fail	Fail	NA	No	NA	NA	NA	Nunavut	Grinnell Peninsula, Devon Island	Porden Point, Grinnell Peninsula, Devon Island	RbJr-5	AD 1200 - 1400	Thule	Inuit	n/a	Canis sp.	cranium	complete, missing zygomatics (incisors-M2)	n/a	adult (heavy wear)		congenital absence of L P1; R C pulp cavity exposed, tip broken/worn; weathered on frontal/parietal	Brown, S.K.	Canadian Museum of History	McGhee, Robert	early 1970s	Park 1984, 1987, 1997	CAT# 99.1B; associated with R+L mandibles (complete with teeth), congenital absence of p1
RBJR-5:99.4	NA			Brown, S.K. (VGL)	UC Davis	2/24/2013	Yes	Dog	A2b or A2a	NNNNNNNNNNNNNNNNNNNNNNNNNNNNNNNNNNNNNNNNNNNNNNNNNNNNNNNNNNNNNNNNNNNNNTGTCAGTATCTCCNNNNNNNNNNNNNNNNCCCTCCCCNTATGTACGTCGTGCATTAATGGTTTGCCCCATGCATATAAGCATGTACATAATATTATATCCTTACATAGGANCATATTAACTCAATCTCATAGTTCACTGATCTATCAACAGTAATCGAATGCATATCACTTAGTCCAATAAGGGCTTAATCACCATGCCTCGAGAAACCATNNNCAACCCTTGCTCGTANATGTCCCTCTTCTCGCTCCGGGCCCATACTANACGTGGGGGTTACTATCATGAAACTATACCTGGCATCTGGNTTCTTACTTCAGGGCCANNNTNANACT…	Yes	3.4	NA	NA	Nunavut	Grinnell Peninsula, Devon Island	Porden Point, Grinnell Peninsula, Devon Island	RbJr-5	AD 1200 - 1400	Thule	Inuit	n/a	Canis sp.	cranium	complete, missing nasals/zygomatics (R:P3-P4; L P3-M1)	n/a	adult (no wear)		congenital absence of P1	Brown, S.K.	Canadian Museum of History	McGhee, Robert	early 1970s	Park 1984, 1987, 1997	CAT# 99.4
RBJU-1:1107	NA			Brown, S.K. (VGL)	UC Davis	2/24/2013	Yes	DOG?	Indeterminate	GNNNNNNNNNNNNNNNNNNNNNNNNNNNNNNNNNNNNNNNNNNNNNNNNNNNNNNNNNNNNNNNNNNNNNNNNNNNNNNNNNNNNNNNNNNNNNNNNNNNNNNNNNNNNNNNNNNNNNNNNNNNNNNNNNNNNNNNNNNNNNNNNNNNNNNNNNNNNNNNNNNNNNNNNNNNNNNNNNNNNNNNNNNNNNNNNNNNNNNNNNNNNNNNNNNNNNNNNNNNNNNNNNNNNNNNNNNNNNNNNNNNNNNNNNNNNNNNNNNNNNCATGCCTCGAGAAACCATNNNCAACCCTTGCTCGTANATGTCCCTCTTCTCGCTCCGGGCCCATACTANACGTGGGGGTTACTATCATGAAACTATACCTGGCATCTGGNTTCTTACTTCAGGGCCANNNTNANACT…	Yes	0.6	INDETERMINATE	NA	Nunavut	Cape Grinnell, Devon Island	Port Refuge, Cape Grinnell, Devon Island	RbJu-1	BC 2500 - 1500	Independence I (early Predorset)	Paleo-Inuit	n/a	Canis sp.	mandible	complete (c, p3, p4 erupting)	R	juvenile		p1 alveolus present; canine root open	Brown, S.K., and C.M. Darwent	Canadian Museum of History	McGhee, Robert	early 1970s	McGhee 1979	AS# 380
RBJU-1:COLD	NA			Brown, S.K. (VGL)	UC Davis	3/5/2013	Yes	Dog	A2b	CATGCCTCGAGAAACCATCAACCCTTGCTCGTAATGTCCCTCTTCTCGCTCCGGGCCCATACTAACGTGGGGGTTACTATCATGAAACTATACCTGGCATCTGGTTCTTACTTCAGGGCCATAACTTTATTTACTCCAATCCTACTAATTCTCGCAAATGGGACATCTCGATGGACTAATGACTAATCAGCCCATGATCACACATAAC	Yes	4.8; 2.3	A2b	NA	Nunavut	Cape Grinnell, Devon Island	Port Refuge, Cape Grinnell, Devon Island	RbJu-1	BC 2500 - 1500	Independence I (early Predorset)	Paleo-Inuit	n/a	Canis sp.	humerus	midshaft	L	n/a		n/a	Brown, S.K., and C.M. Darwent	Canadian Museum of History	McGhee, Robert	early 1970s	McGhee 1979	AS# 1299
SEL-033-0057	NA			Brown, S.K. (VGL)	UC Davis	6/12/2014	Yes	Dog	Fail	NA	Yes	0.0; 6.4	A2a	NA	Alaska	Upper Kachemak Bay, Cook Inlet	Chugachik Island, Upper Kachemak Bay, Cook Inlet	49-SEL-033	BC 700 - AD 200	Kachemak	Paleo-Inuit	Unit 29.33N, 5.14W; Level 12, 112 BS	Canis sp.	sesamoid	complete	n/a	adult		n/a	Darwent, C.M./ Kelly Eldridge	University of Alaska Anchorage	Workman, Karen and William	early 1970s	Workman, K. 1977 (APUA)	associated rib submitted for radiocarbon dating
SEL-033-1108	NA			Brown, S.K. (VGL)	UC Davis	6/12/2014	Yes	Fail	Fail	NA	No	NA	NA	NA	Alaska	Upper Kachemak Bay, Cook Inlet	Chugachik Island, Upper Kachemak Bay, Cook Inlet	49-SEL-033	BC 700 - AD 200	Kachemak	Paleo-Inuit	Unit 35.47N, 9.41W; Level 1, 0-10 BS; Level 1	Canis sp.	mandible	complete (i3, p3-4)	L	juvenile		congenital absence of p1, p2; m3 not erupted	Darwent, C.M./ Kelly Eldridge	University of Alaska Anchorage	Workman, Karen and William	early 1970s	Workman, K. 1977 (APUA)
SEL-033-1219	NA			Brown, S.K. (VGL)	UC Davis	6/12/2014	No	Fail	Fail	NA	No	NA	NA	NA	Alaska	Upper Kachemak Bay, Cook Inlet	Chugachik Island, Upper Kachemak Bay, Cook Inlet	49-SEL-033	BC 700 - AD 200	Kachemak	Paleo-Inuit	Unit 4-5N, 8-11W; Level 20, 190-200 BS	Canis sp.	cranium	maxilla/frontal	n/a	adult		impact hole in L frontal; possible impact hole in R frontal	Darwent, C.M./ Kelly Eldridge	University of Alaska Anchorage	Workman, Karen and William	early 1970s	Workman, K. 1977 (APUA)
SEL-033-1505	NA			Brown, S.K. (VGL)	UC Davis	6/13/2014	Yes	Fail	Fail	NA	No	NA	NA	NA	Alaska	Upper Kachemak Bay, Cook Inlet	Chugachik Island, Upper Kachemak Bay, Cook Inlet	49-SEL-033	BC 700 - AD 200	Kachemak	Paleo-Inuit	Unit 0-1S, 8-10W; Level 13, 120-130 BS	Canis sp.	cranium	maxilla/cranial vault (dC, dP2-4)	R	juvenile (1-4 mos)		n/a	Darwent, C.M./ Kelly Eldridge	University of Alaska Anchorage	Workman, Karen and William	early 1970s	Workman, K. 1977 (APUA)
SEL-033-2250	NA			Brown, S.K. (VGL)	UC Davis	6/12/2014	Yes	Fail	Fail	NA	Yes	NA	NA	NA	Alaska	Upper Kachemak Bay, Cook Inlet	Chugachik Island, Upper Kachemak Bay, Cook Inlet	49-SEL-033	BC 700 - AD 200	Kachemak	Paleo-Inuit	Unit 0-1S, 8-10W; Level 20, 190-200 BS	Canis sp.	mandible	horizontal ramus	L	juvenile	F?	n/a	Darwent, C.M./ Kelly Eldridge	University of Alaska Anchorage	Workman, Karen and William	early 1970s	Workman, K. 1977 (APUA)
SEL-033-2269	NA			Brown, S.K. (VGL)	UC Davis	6/12/2014	Yes	INDET	Fail	NA	Yes	1.1	NA	NA	Alaska	Upper Kachemak Bay, Cook Inlet	Chugachik Island, Upper Kachemak Bay, Cook Inlet	49-SEL-033	BC 700 - AD 200	Kachemak	Paleo-Inuit	Unit 25-26N, 12-14W; Level 13, 120-130 BS	Canis sp.	cranium	calvarium (vault + base)	n/a	adult	F	impact hole in left frontal	Darwent, C.M./ Kelly Eldridge	University of Alaska Anchorage	Workman, Karen and William	early 1970s	Workman, K. 1977 (APUA)
SEL-033-2519	NA			Brown, S.K. (VGL)	UC Davis	6/12/2014	Yes	Dog	Fail	NA	Yes	1.4	NA	NA	Alaska	Upper Kachemak Bay, Cook Inlet	Chugachik Island, Upper Kachemak Bay, Cook Inlet	49-SEL-033	BC 700 - AD 200	Kachemak	Paleo-Inuit	Unit 31.73N, 10.37W; Level 11, 103 BS	Canis sp.	cranium	complete (all teeth)	n/a	adult	M	congenital absence of P1	Darwent, C.M./ Kelly Eldridge	University of Alaska Anchorage	Workman, Karen and William	early 1970s	Workman, K. 1977 (APUA)	refits to R+L mandibles; both with congenital absence of p1
SEL-033-2520	NA			Brown, S.K. (VGL)	UC Davis	6/12/2014	Yes	Dog	A2b	NNNNNNNNNNNNNNNNNNNNNNNNNNNNNNNNNNNNNNNNNNNNNNNNNNNNNNNNNNNNNNNNNNNNNNNNNNNNNNNNNNNNNNNNNNNNNNNNNNCCCTCCCCNTATGTACGTCGTGCATTAATGGTTTGCCCCATGCATATAAGCATGTACATAATATTATATCCTTACATAGGANCATATTAACTCAATCTCATAGTTCATNGATCTATCAACAGTAATCGAATGCATATCACTTAGTCCAATAAGGGCTTAATCACCATGCCTCGAGAAACCATNNNCAACCCTTGCTCGTANATGTCCCTCTTCTCGCTCCGGGCCCATACTANACGTGGGGGTTACTATCATGAAACTATACCTGGCATCTGGNTTCTTACTTCAGGGCCANNNTNANACT…	No	NA	NA	NA	Alaska	Upper Kachemak Bay, Cook Inlet	Chugachik Island, Upper Kachemak Bay, Cook Inlet	49-SEL-033	BC 700 - AD 200	Kachemak	Paleo-Inuit	Unit 31.20-32.25N, 10.70W; Level 7-11, 78-103 BS	Canis sp.	mandibular M1	complete	R	adult		n/a	Darwent, C.M./ Kelly Eldridge	University of Alaska Anchorage	Workman, Karen and William	early 1970s	Workman, K. 1977 (APUA)	does not refit with any mandibles from this site
SEL-033-2907	NA			Brown, S.K. (VGL)	UC Davis	6/12/2014	No	Fail	Fail	NA	No	NA	NA	NA	Alaska	Upper Kachemak Bay, Cook Inlet	Chugachik Island, Upper Kachemak Bay, Cook Inlet	49-SEL-033	BC 700 - AD 200	Kachemak	Paleo-Inuit	Unit 3-4N, 8-11W; Level 26, 250-260 BS	Canis sp.	cranium	complete (R: P2, P4, M2; L: P2, P4--M2)	n/a	adult	F	congenital absence of P1	Darwent, C.M./ Kelly Eldridge	University of Alaska Anchorage	Workman, Karen and William	early 1970s	Workman, K. 1977 (APUA)
SFFK-4:H10-H1	NA			Brown, S.K. (VGL)	UC Davis	12/92013	Yes	INDET	Fail	NA	Yes	0.5	NA	NA	Nunavut	Buchanan Bay, Ellesmere Island	Skraeling Island, Buchanan Bay, Ellesmere Island	SfFk-4, House 10	AD 1200 - 1300	early Thule (Ruin Island)	Inuit	n/a	Canis sp.	humerus	complete	L	juvenile		minor gnawing damage; unfused	Brown, S.K.	Canadian Museum of History	McCullough, Karen and Peter Schledermann	early 1980s	McCullough 1989	AS# 948
SFFK-4:H11-M1	NA			Brown, S.K. (VGL)	UC Davis	9/4/2013	Yes	Fail	Fail	NA	No	NA	NA	NA	Nunavut	Buchanan Bay, Ellesmere Island	Skraeling Island, Buchanan Bay, Ellesmere Island	SfFk-4, House 11	AD 1200 - 1300	early Thule (Ruin Island)	Inuit	East room, floor level	Canis sp.	mandible	complete (c-m2)	L	adult	F	congenital absence of p1	Brown, S.K.	Canadian Museum of History	McCullough, Karen	8/1980	McCullough 1989	AS# 923
SFFK-4:H11-M2	NA			Brown, S.K. (VGL)	UC Davis	9/4/2013	Yes	Dog	Fail	NA	Yes	0.9	NA	NA	Nunavut	Buchanan Bay, Ellesmere Island	Skraeling Island, Buchanan Bay, Ellesmere Island	SfFk-4, House 11	AD 1200 - 1300	early Thule (Ruin Island)	Inuit	n/a	Canis sp.	mandible	complete (p4-m2)	L	adult	F	very small p1 alveolus; coronoid process broken	Brown, S.K.	Canadian Museum of History	McCullough, Karen	8/1980	McCullough 1989	AS# 923
SFFK-4:H17-F1	NA			Brown, S.K. (VGL)	UC Davis	12/9/2013	No	Fail	Fail	NA	No	NA	NA	NA	Nunavut	Buchanan Bay, Ellesmere Island	Skraeling Island, Buchanan Bay, Ellesmere Island	SfFk-4, House 17	AD 1200 - 1300	early Thule (Ruin Island)	Inuit	n/a	Canis sp.	femur	dist + 3/4 shaft	L	adult		weathered	Brown, S.K.	Canadian Museum of History	McCullough, Karen and Peter Schledermann	early 1980s	McCullough 1989	AS# 928
SFFK-4:H2-T2	NA			Brown, S.K. (VGL)	UC Davis	12/9/2013	Yes	Dog	Fail	NA	Yes	1.4	NA	NA	Nunavut	Buchanan Bay, Ellesmere Island	Skraeling Island, Buchanan Bay, Ellesmere Island	SfFk-4, House 2	AD 1200 - 1300	early Thule (Ruin Island)	Inuit	kitchen floor	Canis sp.	tibia	complete	R	juvenile		unfused; burned and weathered (cracked along shaft)	Brown, S.K.	Canadian Museum of History	Schledermann, Peter	7/1981	McCullough 1989	AS# 942
SFFK-4:H20-H1	NA			Brown, S.K. (VGL)	UC Davis	12/9/2013	Yes	Dog	Fail	NA	Yes	0.9	NA	NA	Nunavut	Buchanan Bay, Ellesmere Island	Skraeling Island, Buchanan Bay, Ellesmere Island	SfFk-4, House 20	AD 1200 - 1300	early Thule (Ruin Island)	Inuit	n/a	Canis sp.	humerus	complete	R	adult		slight charring	Brown, S.K.	Canadian Museum of History	McCullough, Karen and Peter Schledermann	early 1980s	McCullough 1989	AS# 949
SFFK-4:H21-M1	NA			Brown, S.K. (VGL)	UC Davis	10/29/2013	Yes	Fail	Fail	NA	No	NA	NA	NA	Nunavut	Buchanan Bay, Ellesmere Island	Skraeling Island, Buchanan Bay, Ellesmere Island	SfFk-4, House 21	AD 1200 - 1300	early Thule (Ruin Island)	Inuit	floor	Canis sp.	mandible	complete (m1-m2)	R	adult		congenital absence of p1	Brown, S.K.	Canadian Museum of History	McCullough, Karen and Peter Schledermann	7/1980	McCullough 1989	AS# 942
SFFK-4:H22-T3	NA			Brown, S.K. (VGL)	UC Davis	12/9/2013	No	Fail	Fail	NA	No	NA	NA	NA	Nunavut	Buchanan Bay, Ellesmere Island	Skraeling Island, Buchanan Bay, Ellesmere Island	SfFk-4, House 22	AD 1200 - 1300	early Thule (Ruin Island)	Inuit	n/a	Canis sp.	tibia	complete	L	juvenile		unfused	Brown, S.K.	Canadian Museum of History	McCullough, Karen and Peter Schledermann	early 1980s	McCullough 1989	AS# 942
SFFK-4:H3-F1	NA			Brown, S.K. (VGL)	UC Davis	12/9/2013	Yes	Dog	A2a	NNNNNNNNNNNNNNNNNNNNNNNNNNNNNNNNNNNNNNNNNNNNNNNNNNNNNNNNNNNNNNNNNNNNNNNNNNNNNNNNNNNNNNNNNNNNNNNNNNCCCTCCCCNTATGTACGTCGTGCATTAATGGTTTGCCCCATGCATATAAGCATGTACATAATATTATATCCTTACATAGGANCATATTAACTCAATCTCATAGTTCACTGATCTACCAACAGTAATCGAATGCATATCACTTAGTCCAATAAGGGCTTAATCACCATGCCTCGAGAAANNNNNNNNNNNNNNNNNNNNNNNNNNNNNNNNNNNNNNNNNNNNNNNNNNNNNNNNNNNNNNNNNNNNNNNNNNNNNNNNNNNNNNNNNNNNNNNNNNNNNNNNNNNNNNNNNNNNNNNNNNN…	Yes	0.2	NA	NA	Nunavut	Buchanan Bay, Ellesmere Island	Skraeling Island, Buchanan Bay, Ellesmere Island	SfFk-4, House 3	AD 1200 - 1300	early Thule (Ruin Island)	Inuit	n/a	Canis sp.	femur	prox + 3/4 shaft	R	adult		spiral fracture dist end, gnawing on prox end	Brown, S.K.	Canadian Museum of History	McCullough, Karen and Peter Schledermann	early 1980s	McCullough 1989	AS# 946
SFFK-4:H4-H1	NA			Brown, S.K. (VGL)	UC Davis	9/4/2013	Yes	Dog	A1b	NNNNNNNNNNNNNNNNNNNNNNNNNNNNNNNNNNNNNNNNNNNNNNNNNNNNNNNNNNNNNNNNNNNNNNNNNNNNNNNNNNNNNNNNNNNNNNNNNNNNNNCCCCNTATGTACGTCGTGCATTAATGGTTTGCCCCATGCATATAAGCATGTACATAATATTATATCCTTACATAGGANCATATTAACTCAATCTCATAGTTCACTGATCTACCAACAGTAATCGAATGCATATCACTTAGTCCAATAAGGGCTTAATCACCATGCCTCGAGAAACCATNNNCAACCCTTGCTCGTANATGTCCCTCTTCTCGCTCCGGGCCCATACTANACGTGGGGGTTACTATCATGAAACTATACCTGGCATCTGGTTTCTTACTTCAGGGCCANNNTNANACT…	Yes	3	A1b	NA	Nunavut	Buchanan Bay, Ellesmere Island	Skraeling Island, Buchanan Bay, Ellesmere Island	SfFk-4, House 4	AD 1200 - 1300	early Thule (Ruin Island)	Inuit	n/a	Canis sp.	humerus	prox + 1/2 shaft	L	adult		spiral fracture midshaft	Brown, S.K.	Canadian Museum of History	McCullough, Karen and Peter Schledermann	early 1980s	McCullough 1989	AS# 939; no caribou bone for radiocarbon dating
SFFK-4:H4M-H1	NA			Brown, S.K. (VGL)	UC Davis	12/3/2013	No	Fail	Fail	NA	No	NA	n/a	NA	Nunavut	Buchanan Bay, Ellesmere Island	Skraeling Island, Buchanan Bay, Ellesmere Island	SfFk-4, House 4, Midden	AD 1200 - 1300	early Thule (Ruin Island)	Inuit	Unit 7x, 12y; 20-30 cm BS	Canis sp.	humerus	complete	R	adult			Darwent, C.M.	U Calgary/Canadian Museum of History	McCullough, Karen and Peter Schledermann	early 1980s	McCullough 1989
SFFK-4:H6-H1	NA			Brown, S.K. (VGL)	UC Davis	12/3/2013	Yes	INDET	Fail	NA	Yes	0.6	NA	NA	Nunavut	Buchanan Bay, Ellesmere Island	Skraeling Island, Buchanan Bay, Ellesmere Island	SfFk-4, House 6	AD 1200 - 1300	early Thule (Ruin Island)	Inuit	n/a	Canis sp.	humerus	complete	R	adult		n/a	Brown, S.K.	Canadian Museum of History	McCullough, Karen and Peter Schledermann	early 1980s	McCullough 1989	AS# 944; CAT# 3363
SFFK-4:H8-M1	NA			Brown, S.K. (VGL)	UC Davis	9/4/2013	Yes	Fail	Fail	NA	No	NA	NA	NA	Nunavut	Buchanan Bay, Ellesmere Island	Skraeling Island, Buchanan Bay, Ellesmere Island	SfFk-4, House 8	AD 1200 - 1300	early Thule (Ruin Island)	Inuit	n/a	Canis sp.	mandible	complete (p4-m2)	L	adult		congenital absence of p1; canine cracked	Brown, S.K.	Canadian Museum of History	McCullough, Karen and Peter Schledermann	early 1980s	McCullough 1989	AS# 921
SFFL-10	NA			Brown, S.K. (VGL)	UC Davis	2/19/2013	No	Fail	Fail	NA	No	NA	NA	NA	Nunavut	Bache Peninsula, Ellesmere Island	Rastoden, Bache Peninsula, Ellesmere Island	SfFl-10	BC 1200 - 1300	late Predorset	Paleo-Inuit	Area B-4, #3	Canis sp.	maxillary P4	complete	n/a	adult (heavy wear)		weathered	Brown, S.K.	Canadian Museum of History	Schledermann, Peter and Karen McCullough	early 1980s	Schledermann 1990	AS# 952
SGFM-4:H14-C1	NA			Brown, S.K. (VGL)	UC Davis	2/24/2013	Yes	Dog	A2a	NNNNNNNNNNNNNNNNNNNNNNNNNNNNNNNNNNNNNNNNNNNNNNNNNNNNNNNNNNNNNNNNNNNNNNNNNNNNNNNNNNNNNNNNNNNNNNNNNNNNNNNNNNNNNNNNNCGTCGTGCATTAATGGTTTGCCCCATGCATATAAGCATGTACATAATATTATATCCTTACATAGGANCATATTAACTCAATCTCATAGTTCACTGATCTACCAACAGTAATCGAATGCATATCACTTAGTCCAATAAGGGCTTAATCACCATGCCTCGAGAAACCATNNNCAACCCTTGCTCGTANATGTCCCTCTTCTCGCTCCGGGCCCATACTANACGTGGGGGTTACTATCATGAAACTATACCTGGCATCTGGNTTCTTACTTCAGGGCCANNNTNANACT…	No	NA	NA	NA	Nunavut	Knud Peninsula, Ellesmere Island	Eskimobyen, Knud Peninsula, Ellesmere Island	SgFm-4, House 14	AD 1300 - 1700	Thule (post Ruin Island)	Inuit	Unit 7N/15E, Level 2	Canis lupus lupus?	cranium	complete (R: incisors, P4-M2; L: incisor, C, P2-M2)	n/a	adult (heavy wear)	M	congenital absence of P1, alveolar resorption of P2-3; healed fractures on frontals; holes in both orbits; squamosal broken	Brown, S.K.	Canadian Museum of History	McCullough, Karen and Peter Schledermann	early 1980s	McCullough 1989	AS# 1086
SGFM-4:H14-C2	NA			Brown, S.K. (VGL)	UC Davis	2/24/2013	Yes	Dog	A2a	NNNNNNNNNNNNNNNNNNNNNNNNNNNNNNNNNNNNNNNNNNNNNNNNNNNNNNNNNNNNNNNNNNNNNNNNNNNNNNNNNNNNNNNNNNNNNNNNNNNNNNCCCCNTATGTACGTCGTGCATTAATGGTTTGCCCCATGCATATAAGCATGTACATAATATTATATCCTTACATAGGANCATATTAACTCAATCTCATAGTTCACTGATCTACCAACAGTAATCGAATGCATATCACTTAGTCCAATAAGGGCTTAATCACCATGCCTCGAGAAACCATNNNCAACCCTTGCTCGTANATGTCCCTCTTCTCGCTCCGGGCCCATACTANACGTGGGGGTTACTATCATGAAACTATACCTGGCATCTGGNTTCTTACTTCAGGGCCANNNTNANACT…	No	NA	NA	NA	Nunavut	Knud Peninsula, Ellesmere Island	Eskimobyen, Knud Peninsula, Ellesmere Island	SgFm-4, House 14	AD 1300 - 1700	Thule (post Ruin Island)	Inuit		Canis sp.	cranium	maxillary fragment (P4)	L	adult (no wear)		n/a	Brown, S.K.	Canadian Museum of History	McCullough, Karen and Peter Schledermann	early 1980s	McCullough 1989
SGFM-4:H14-C3	NA			Brown, S.K. (VGL)	UC Davis	2/24/2013	Yes	Dog	A2a	NNNNNNNNNNNNNNNNNNNNNNNNNNNNNNNNNNNNNNNNNNNNNNNNNNNNNNNNNNNNNNNNNNNNNNNNNNNNNNNNNNNNNNNNNNNNNNNNNNCCCTCCCCNTATGTACGTCGTGCATTAATGGTTTGCCCCATGCATATAAGCATGTACATAATATTATATCCTTACATAGGANCATATTAACTCAATCTCATAGTTCACTGATCTACCAACAGTAATCGAATGCATATCACTTAGTCCAATAAGGGCTTAATCACCATGCCTCGAGAAACCATNNNCAACCCTTGCTCGTANATGTCCCTCTTCTCGCTCCGGGCCCATACTANACGTGGGGGTTACTATCATGAAACTATACCTGGCATCTGGNTTCTTACTTCAGGGCCANNNTNANACT…	Yes	0.5	NA	NA	Nunavut	Knud Peninsula, Ellesmere Island	Eskimobyen, Knud Peninsula, Ellesmere Island	SgFm-4, House 14	AD 1300 - 1700	Thule (post Ruin Island)	Inuit		Canis sp.	cranium	maxilla + squamosal fragment (P4)	L	adult (no wear)		n/a	Brown, S.K.	Canadian Museum of History	McCullough, Karen and Peter Schledermann	early 1980s	McCullough 1989
SGFM-4:H20-M	NA			Brown, S.K. (VGL)	UC Davis	2013-02-24	Yes	Dog	Fail	NA	Yes	1.2	NA	NA	Nunavut	Knud Peninsula, Ellesmere Island	Eskimobyen, Knud Peninsula, Ellesmere Island	SgFm-4, House 20	AD 1300 - 1700	Thule (post Ruin Island)	Inuit	Level 1, central area	Canis sp.	mandible	horizontal ramus		juvenile		m1 erupting; canine alveolus absess; ascending ramus gnawed off	Darwent, C.M.	U Calgary/Canadian Museum of History	McCullough, Karen and Peter Schledermann	early 1980s	McCullough 1989
SGFM-5	NA			Brown, S.K. (VGL)	UC Davis	6/12/2014	Yes	INDET	Fail	NA	Yes	0.3	NA	NA	Nunavut	Knud Peninsula, Ellesmere Island	Cove Site, Knud Peninsula, Ellesmere Island	SgFm-5	AD 1300 - 1700	Thule (post Ruin Island)	Inuit	Unit 21x, 104y	Canis sp.	mandibular p4	complete	R	adult		n/a	Brown, S.K.	Canadian Museum of History	McCullough, Karen and Peter Schledermann	early 1980s	McCullough 1989	AS# 955
SGFQ-1:H24-F1	NA			Brown, S.K. (VGL)	UC Davis	9/9/2013	Yes	Fail	Fail	NA	No	NA	NA	NA	Nunavut	Hayes Fjord, Ellesmere Island	Haa Island, Hayes Fjord, Ellesmere Island	SgFq-1, House 24	AD 1500 - 1700	Thule	Inuit	n/a	Canis sp.	fibula	complete		adult		n/a	Brown, S.K.	Canadian Museum of History	McCullough, Karen and Peter Schledermann	early 1980s	McCullough 1989	associated tibia measured
SGFQ-1:H9-1	NA			Brown, S.K. (VGL)	UC Davis	12/9/2013	Yes	DOG?	A2a	CTGAGATTCTTCTTAAACTATTCCCTGACACCCCTACATTCATATATTGAATCACCCCTACTGTGCTATGTCAGTATCTCCAGGTAAACCCTTCTCCCCTCCCCTATGTACGTCGTGCATTAATGGTTTGCCCCATGCATATAAGCATGTACATAATATTATATCCTTACATAGGACATATTAACTCAATCTCATAGTTCACTGATCTACCAACAGTAATCGAATGCATATCACTTAGTCCAATAAGGGCTTAATCACCATGCCTCGAGAAACCATCAACCCTTGCTCGTAATGTCCCTCTTCTCGCTCCGGGCCCATACTAACGTGGGGGTTACTATCATGAAACTATACCTGGCATCTGGTTCTTACTTCAGGGCCATAACTTTATTTACTCCAATC…	Yes	7.9	A2a	NA	Nunavut	Hayes Fjord, Ellesmere Island	Haa Island, Hayes Fjord, Ellesmere Island	SgFq-1, House 9	AD 1500 - 1700	Thule	Inuit	n/a	Canis sp.	cranium/mandible	complete	R+L	juvenile		cranium: blow to R frontal, AD P4 erupting, highly fragmented; mandibles: m1 erupting, m2 crypt closed, AD canine erupting	Brown, S.K.	Canadian Museum of History	McCullough, Karen and Peter Schledermann	early 1980s	McCullough 1989	cranium not measured
SGFQ-1:H9-2	NA			Brown, S.K. (VGL)	UC Davis	9/9/2013	Yes	Dog	Fail	NA	Yes	0.9	NA	NA	Nunavut	Hayes Fjord, Ellesmere Island	Haa Island, Hayes Fjord, Ellesmere Island	SgFq-1, House 9	AD 1500 - 1700	Thule	Inuit	n/a	Canis sp.	metacarpals III-V	complete		adult		gnawing on shafts	Brown, S.K.	Canadian Museum of History	McCullough, Karen and Peter Schledermann	early 1980s	McCullough 1989
SI-H2-1	NA			Brown, S.K. (VGL)	UC Davis	1/31/2012	No	Fail	Fail	NA	No	NA	NA	NA	Alaska	Lopp Lagoon, Seward Peninsula	Singauruk, Lopp Lagoon, Seward Peninsula	49-TEL-011	AD 1000 - 1200	early Thule	Inuit	n/a	Canis sp.	mandible	complete (all teeth; pm4 sampled)	L	old adult (worn)		congenital absence of P1; mottled burning on mesial 1/2 of body and teeth	Darwent, C.M.	Haffenreffer Museum	Anderson, Douglas D./ J. Louis Giddings	1964	Darwent (in press); Giddings & Anderson 1986	pm4 sampled; caribou bone radiocarbon dated by Beta in 2011
SI-H2-2	NA			Brown, S.K. (VGL)	UC Davis	2/13/2013	No	Fail	Fail	NA	No	NA	NA	NA	Alaska	Lopp Lagoon, Seward Peninsula	Singauruk, Lopp Lagoon, Seward Peninsula	49-TEL-011	AD 1000 - 1200	early Thule	Inuit	n/a	Canis sp.	metatarsal	prox + 3/4 shaft		adult			Darwent, C.M.	Haffenreffer Museum	Anderson, Douglas D./ J. Louis Giddings	1964	Darwent (in press); Giddings & Anderson 1986	stamped "7004" by Haffenreffer in 1950s; caribou bone radiocarbon dated by Beta in 2011
SKU-DOG-1	NA			Brown, S.K. (VGL)	UC Davis	12/15/2013	Yes	Dog	Fail	NA	Yes	0.9	NA	NA	Iceland	Mývatn	Skútustaðir, Mývatn	n/a	AD 1610 - 1717	Medieval	Other	Trench H, midden	Canis sp.	cranium	maxillary dP3		juvenile			McGovern, Thomas H.	CUNY/NABO	FSI/NABO	2011	Hicks 2013; www.nabohome.org	similar to historic reference dog (CUNY lab)
SKU-DOG-2	NA			Brown, S.K. (VGL)	UC Davis	12/15/2013	Yes	Dog	Fail	NA	Yes	1	NA	NA	Iceland	Mývatn	Skútustaðir, Mývatn	n/a	AD 1610 - 1717	Medieval	Other	Trench H, midden	Canis sp.	mandible	dp4		juvenile			McGovern, Thomas H.	CUNY/NABO	FSI/NABO	2011	Hicks 2013; www.nabohome.org	similar to historic reference dog (CUNY lab)
SLT-094-09-00507	NA			Brown, S.K. (VGL)	UC Davis	2014-06-08	No	Fail	Fail	NA	No	NA	NA	NA	Alaska	Middle Kuskokwim	Angyaruaq (Jungjuk) Port Site, Middle Kuskokwim	49-SLT-094		n/a	Paleo-Inuit	EU6, NE quad, Level 3, 19cm BUD, TS# 336	Canis sp.	metatarsal 1 or 2	dist 1/2	R	adult			Reuther, Josh	UA Museum of the North	Northern Land Use Research			FS# 176
Sort	Sort			Sinding, M-H.S.	Copenhagen		Yes	Dog	NA	NA	Yes	109	NA	NA	Canada	Nunavut	Gjøa Havn		1906	Historical	Historical										Museum of Cultural History, Norway
SUM-025-74	NA			Brown, S.K. (VGL)	UC Davis	6/19/2012	Yes	Fail	Fail	NA	Yes	0.8; 0.7	NA	NA	Alaska	Gulf of Alaska	North Point, Gulf of Alaska	49-SUM-025	BC 850 - AD 50		Siberian Holocene	ph-04, TP#3, SW quad, 12 cm BS	Canis sp.	radius	complete	L	adult			Reuther, Josh	UA Museum of the North	Northern Land Use Research		Bowers & Moss 2001	UA94-6633; Lot #1
TJFD-3:1	NA			Brown, S.K. (VGL)	UC Davis	3/5/2013	Yes	BACTERIA	Fail	NA	No	NA	NA	NA	Nunavut	Lake Hazen, Ellesmere Island	West Wind, Lake Hazen, Ellesmere Island	TjFd-3, Feature 5	BC 2880 - 2450	Independence I	Paleo-Inuit	Unit C4-6, 0-10 cm BS	Canis sp.	canine	complete		adult (slight wear)			Brown, S.K.	Canadian Museum of History	Sutherland, Patricia		Sutherland 1989	AS# 79
TRF-01-01	ZMK 13w/1909	P60/2016KMG		Feuerborn, T.R.	Copenhagen/Stockholm		Yes	Dog	NA	NA	Yes	34.37	A2a	A2a	Greenland	North East Greenland	Stormbugt I		Thule	Thule	Inuit										Natural History Museum of Denmark
TRF-01-02	ZMK 13w/1909	P61/2016KMG		Feuerborn, T.R.	Copenhagen/Stockholm		Yes	Dog	NA	NA	Yes	0.152089	NA	NA	Greenland	North East Greenland	Stormbugt I			Thule	Inuit										Natural History Museum of Denmark
TRF-01-03	ZMK 23/1932	P62/2016KMG		Feuerborn, T.R.	Copenhagen/Stockholm		Yes	Dog	NA	NA	Yes	1.29545	NA	NA	Greenland	East Greenland	Sukersit			Thule	Inuit										Natural History Museum of Denmark
TRF-01-04	ZMK 6/1895	P63/2016KMG		Feuerborn, T.R.	Copenhagen/Stockholm		Yes	Dog	NA	NA	Yes	0.456029	NA	NA	Greenland	North East Greenland	Hekla Havn		1895	Historical	Historical										Natural History Museum of Denmark
TRF-01-05	ZMK 6/1895	P64/2016KMG	ZMK_P64	Feuerborn, T.R.	Copenhagen/Stockholm		Yes	Dog	NA	NA	Yes	1.25647	NA	NA	Greenland	North East Greenland	Hekla Havn		1895	Historical	Historical										Natural History Museum of Denmark
TRF-01-06	ZMK 6/1895	P65/2016KMG	ZMK_P65	Feuerborn, T.R.	Copenhagen/Stockholm		Yes	Dog	NA	NA	Yes	5.98715	A2a	NA	Greenland	North East Greenland	Hekla Havn		1895	Historical	Historical										Natural History Museum of Denmark
TRF-01-07	ZMK 58/1985	P66/2016KMG	ZMK_TRF_01_07	Feuerborn, T.R.	Copenhagen/Stockholm		Yes	Dog	NA	NA	Yes	4.08579	A2a	NA	Greenland	North West Greenland	”Monumentet”, Hall Land		1985	Historical	Historical										Natural History Museum of Denmark
TRF-01-08	ZMK 18/1932	P67/2016KMG	ZMK_TRF_01_08	Feuerborn, T.R.	Copenhagen/Stockholm		Yes	Dog	NA	NA	Yes	20.2	A1b	A1b	Greenland	East Greenland	Misigtoq, Kangartik		Thule, 1350-1500AD	Thule	Inuit										Natural History Museum of Denmark
TRF-01-09	ZMK 28/1932	P68/2016KMG	ZMK_TRF_01_09	Feuerborn, T.R.	Copenhagen/Stockholm		Yes	Dog	NA	NA	Yes	6.20195	A1a	NA	Greenland	North East Greenland	Dødemandsbugten, Clavering Island		Thule	Thule	Inuit										Natural History Museum of Denmark
TRF-01-10	ZMK 139/1967	P69/2016KMG		Feuerborn, T.R.	Copenhagen/Stockholm		Yes	Dog	NA	NA	Yes	0.0147068	NA	NA	Greenland	South Greenland	Nugarsuk		1650-1850AD?	Thule	Inuit										Natural History Museum of Denmark
TRF-01-11	ZMK 139/1967	P70/2016KMG	ZMK_P70	Feuerborn, T.R.	Copenhagen/Stockholm		Yes	Dog	NA	NA	Yes	5.03	A2a	NA	Greenland	South Greenland	Nugarsuk		Thule? (1650-1850AD?)	Thule	Inuit										Natural History Museum of Denmark
TRF-01-14	ZMK 136/1989	P74/2016KMG		Feuerborn, T.R.	Copenhagen/Stockholm		Yes	Dog	NA	NA	Yes	0.2	NA	NA	Greenland	West Greenland	Nipisat I		Saqqaq	Paleo-Inuit	Paleo-Inuit							NA			Natural History Museum of Denmark
TRF-01-17	ZMK 70/1983	P77/2016KMG		Feuerborn, T.R.	Copenhagen/Stockholm		Yes	Dog	NA	NA	Yes	0.025109	NA	NA	Greenland	West Greenland	Qeqertasagsuk		Saqqaq	Paleo-Inuit	Paleo-Inuit							NA			Natural History Museum of Denmark
TRF-01-22	7K-123c/1955	P26/2017KMG		Feuerborn, T.R.	Copenhagen/Stockholm		Yes	Canis ?	NA	NA	Yes	0.0639684	NA	NA	Canada	Igloolik, Foxe Basin	Kaleruserk		Saqqaq	Paleo-Inuit	Paleo-Inuit										Natural History Museum of Denmark
TRF-01-23	ZMK 113a/1950	P27/2017KMG	ZMK_P27	Feuerborn, T.R.	Copenhagen/Stockholm		Yes	Dog	NA	NA	Yes	18.0239	A1a	A1a	USA	Alaska	Deering, Qalgi			Thule	Inuit										Natural History Museum of Denmark
TRF-01-24	ZMK 113a/1950	P28/2017KMG	ZMK_P28	Feuerborn, T.R.	Copenhagen/Stockholm		Yes	Dog	NA	NA	Yes	23.4741	A1b	A1b	USA	Alaska	Deering, Qalgi			Thule	Inuit										Natural History Museum of Denmark
TRF-01-25	ZMK 53b/1966	P29/2017KMG		Feuerborn, T.R.	Copenhagen/Stockholm		Yes	Dog	NA	NA	Yes	0.377952	NA	NA	Greenland	South Greenland	Inugsuk, Upernavik			Thule	Inuit										Natural History Museum of Denmark
TRF-01-26	ZMK 53a/1966	P30/2017KMG		Feuerborn, T.R.	Copenhagen/Stockholm		Yes	Dog	NA	NA	Yes	1.26	NA	NA	Greenland	South Greenland	Inugsuk			Thule	Inuit										Natural History Museum of Denmark
TRF-01-27	ZMK 113a/1950	P31/2017KMG	Juvenile	Feuerborn, T.R.	Copenhagen/Stockholm		Yes	Dog	NA	NA	Yes	7.16	A2b	NA	USA	Alaska	Deering, Qalgi			Thule	Inuit										Natural History Museum of Denmark
TRF-01-30	MK 1059	P34/2017KMG		Feuerborn, T.R.	Copenhagen/Stockholm		Yes	Dog	NA	NA	Yes	19.1801	A1a	A1a	Greenland	West Greenland	Disco, Qeqertarsuagg		1950	Historical	Historical										Natural History Museum of Denmark
TRF-01-31	ZMK 28/2017	P35/2017KMG		Feuerborn, T.R.	Copenhagen/Stockholm		Yes	Dog	NA	NA	Yes	1.74783	NA	NA	Canada	Manitoba	Fort Churchill			Historical	Historical										Natural History Museum of Denmark
TRF-01-32	ZMK 25/2017	P36/2017KMG	ZMK_P36	Feuerborn, T.R.	Copenhagen/Stockholm		Yes	Dog	NA	NA	Yes	22.01	A2a	A2a	Canada	Southampton Island	Kuk		Thule	Thule	Inuit										Natural History Museum of Denmark
TRF-01-33	ZMK 24/2017	P37/2017KMG		Feuerborn, T.R.	Copenhagen/Stockholm		Yes	Dog	NA	NA	Yes	2.3664	NA	NA	Canada	Southampton Island	Kuk		Thule	Thule	Inuit										Natural History Museum of Denmark
TRF-01-34	ZMK23/2017	P38/2017KMG	ZMK_TRF_01_34	Feuerborn, T.R.	Copenhagen/Stockholm		Yes	Dog	NA	NA	Yes	17.2	A1b	NA	Canada	Baffin	Qilalukan, Cockburn		Thule	Thule	Inuit										Natural History Museum of Denmark
TRF-01-35	ZMK 31/2017	P39/2017KMG		Feuerborn, T.R.	Copenhagen/Stockholm		Yes	Dog	NA	NA	Yes	5.47	A2a	NA	Greenland	Qaanaaq, Thule District	Siorapaluk		c20th	Historical	Historical										Natural History Museum of Denmark
TRF-01-36	ZMK 19/2017	P40/2017KMG		Feuerborn, T.R.	Copenhagen/Stockholm		Yes	Dog	NA	NA	Yes	0.979913	NA	NA	Greenland	Scorsbysund	Ittoqqortoomiit		1927-08-01	Historical	Historical										Natural History Museum of Denmark
TRF-01-39	ZMK 22/2017	P43/2017KMG		Feuerborn, T.R.	Copenhagen/Stockholm		Yes	Dog	NA	NA	Yes	1.67747	NA	NA	Canada	Baffin	Qilalukan, Cockburn		Thule	Thule	Inuit										Natural History Museum of Denmark
TRF-01-41	MK 1050	P45/2017KMG	ZMK_MK_1050	Feuerborn, T.R.	Copenhagen/Stockholm		Yes	Dog	NA	NA	Yes	16.7096	A1b	A1b	Denmark		Hvidovre		1945	Historical	Historical										Natural History Museum of Denmark				Dog brought to Denmark from Greenland
TRF-01-42	ZMK 21/2017	P46/2017KMG		Feuerborn, T.R.	Copenhagen/Stockholm		Yes	Dog	NA	NA	Yes	7.23591	A1a	NA	Greenland	East Greenland	Scorsbysund		1927-08-01	Historical	Historical										Natural History Museum of Denmark
TRF-01-43	MK 1046	P47/2017KMG		Feuerborn, T.R.	Copenhagen/Stockholm		Yes	Dog	NA	NA	Yes	1.88516	NA	NA	Canada	Melville Penninsula	(Danske Øen) Danish Island, Lyon Inlet		1925	Historical	Historical										Natural History Museum of Denmark
TRF-01-45	ZMK 20/2017	P49/2017KMG	ZKM_TRF_01_45	Feuerborn, T.R.	Copenhagen/Stockholm		Yes	Dog	NA	NA	Yes	26.88	A2a	A2a	Greenland	West Greenland	Inugsuk, Upernavik		C.12-14th (Thule)	Thule	Inuit										Natural History Museum of Denmark
TRF-01-46	ZMK 30/2017	P50/2017KMG		Feuerborn, T.R.	Copenhagen/Stockholm		Yes	Dog	NA	NA	Yes	23.47	A1a	NA	Greenland	Qaanaaq, Thule District	Saunders Island		1903	Historical	Historical										Natural History Museum of Denmark
TRF-01-49	MK 1057	P53/2017KMG		Feuerborn, T.R.	Copenhagen/Stockholm		Yes	Dog	NA	NA	Yes	1.71764	NA	NA	Greenland	East Greenland	East		1885	Historical	Historical										Natural History Museum of Denmark
TRF-01-52	ZMK 29/2017	P56/2017KMG		Feuerborn, T.R.	Copenhagen/Stockholm		Yes	Dog	NA	NA	Yes	1.45	NA	NA	Greenland	SW. GL	Nuuk (Godthåb)		1909	Historical	Historical										Natural History Museum of Denmark
TRF-01-53	MK1055	P57/2017KMG		Feuerborn, T.R.	Copenhagen/Stockholm		Yes	Dog	NA	NA	Yes	1.98117	NA	NA	Greenland	Scorsbysund	Ittoqqortoomiit		1927	Historical	Historical										Natural History Museum of Denmark
TRF-01-54	ZMK 31/2017	P58/2017KMG	ZMK_P58	Feuerborn, T.R.	Copenhagen/Stockholm		Yes	Dog	NA	NA	Yes	7.91857	A2a	NA	Greenland	Qaanaaq, Thule District	Siorapaluk		c20th	Historical	Historical										Natural History Museum of Denmark
TRF-01-55	ZMK 31/2017	P59/2017KMG	ZMK_P59	Feuerborn, T.R.	Copenhagen/Stockholm		Yes	Dog	NA	NA	Yes	8.80176	A1a	NA	Greenland	Qaanaaq, Thule District	Siorapaluk		c20th	Historical	Historical										Natural History Museum of Denmark
TRF-01-56	ZMK 31/2017	P60/2017KMG	ZMK_P60	Feuerborn, T.R.	Copenhagen/Stockholm		Yes	Dog	NA	NA	Yes	13.4164	A2a	A2a	Greenland	Qaanaaq, Thule District	Siorapaluk		c20th	Historical	Historical										Natural History Museum of Denmark
TRF-01-57	ZMK 31/2018	P61/2017KMG	ZMK_P61	Feuerborn, T.R.	Copenhagen/Stockholm		Yes	Dog	NA	NA	Yes	10.4336	A2a	A2a	Greenland	Qaanaaq, Thule District	Siorapaluk		c20th	Historical	Historical										Natural History Museum of Denmark
TRF-01-58	ZMK 31/2018	P62/2017KMG		Feuerborn, T.R.	Copenhagen/Stockholm		Yes	Dog	NA	NA	Yes	4.62629	A2a	NA	Greenland	Qaanaaq, Thule District	Siorapaluk		c20th	Historical	Historical										Natural History Museum of Denmark
TRF-01-59	ZMK 27/2017	P75/2017KMG		Feuerborn, T.R.	Copenhagen/Stockholm		Yes	Dog	NA	NA	Yes	1.72	NA	NA	Canada	Manitoba	Fort Churchill		Surface	Historical	Historical										Natural History Museum of Denmark
TRF-01-64	ZMK 350/1982	P79		Feuerborn, T.R.	Copenhagen/Stockholm		Yes	Dog	NA	NA	Yes	0.0292	NA	NA	Greenland		Qaja		Saqqaq	Paleo-Inuit	Paleo-Inuit							NA			Natural History Museum of Denmark
TRF-02-14	36963_b			Feuerborn, T.R.	Copenhagen/Stockholm		Yes	Dog	NA	NA	Yes	21.58	A1a	A1a	USA	Alaska	Point Hope		1926	Historical	Historical			Clothing - Man's parka							National Museum of Denmark
TRF-02-16	36636_b			Feuerborn, T.R.	Copenhagen/Stockholm		Yes	Dog	NA	NA	Yes	23.9961	A1a	A1a	USA	Alaska	St. Lawrence Island		1939	Historical	Historical			Clothing - Man's parka							National Museum of Denmark
TRF-02-17	Lu.798a			Feuerborn, T.R.	Copenhagen/Stockholm		Yes	Dog	NA	NA	Yes	NA	NA	NA	Greenland	West	--		--	Historical	Historical			Clothing - Man's parka							National Museum of Denmark				Concentration too low for sequencing
TRF-02-18	Lu.798b			Feuerborn, T.R.	Copenhagen/Stockholm		Yes	Dog	NA	NA	Yes	0.2	NA	NA	Greenland	West	--		--	Historical	Historical			Clothing - Man's parka							National Museum of Denmark
TRF-02-19	Lu.788			Feuerborn, T.R.	Copenhagen/Stockholm		Yes	Dog	NA	NA	Yes	10.94	A1a	A1a	Greenland	West	--			Historical	Historical			Clothing - Boy's parka							National Museum of Denmark
TRF-02-20	Lu.788			Feuerborn, T.R.	Copenhagen/Stockholm		Yes	Dog	NA	NA	Yes	NA	NA	NA	Greenland	West	--		--	Historical	Historical			Clothing - Boy's parka							National Museum of Denmark				Concentration too low for sequencing
TRF-02-21	K.1-1a			Feuerborn, T.R.	Copenhagen/Stockholm		Yes	Dog	NA	NA	Yes	2.5	NA	NA	Siberia		Nanai, Nivkh		1927	Historical	Historical			Clothing - Girl's Coat							National Museum of Denmark
TRF-02-27	P.6402			Feuerborn, T.R.	Copenhagen/Stockholm		Yes	Dog	NA	NA	Yes	4.93	Wolf	NA	USA	Alaska	North Alaska		1945	Historical	Historical			Clothing - Boy's parka							National Museum of Denmark
TRF-02-28	P.6396			Feuerborn, T.R.	Copenhagen/Stockholm		Yes	Dog	NA	NA	Yes	10.69	Wolf	NA	USA	Alaska	North Alaska		1945	Historical	Historical			Clothing - Man's parka							National Museum of Denmark
TRF-02-29	P.6397			Feuerborn, T.R.	Copenhagen/Stockholm		Yes	Dog	NA	NA	Yes	10.07	Wolf	X- Clade	USA	Alaska	North Alaska		1945	Historical	Historical			Clothing - Man's parka							National Museum of Denmark
TRF-02-30	P.6399			Feuerborn, T.R.	Copenhagen/Stockholm		Yes	Dog	NA	NA	Yes	0.1	NA	NA	Alaska	North Alaska	North Alaska		1945	Historical	Historical			Clothing - Girls's parka							National Museum of Denmark
TRF-02-31	K.6411a			Feuerborn, T.R.	Copenhagen/Stockholm		Yes	Dog	NA	NA	Yes	0.1	NA	NA	Alaska	North Alaska	North Alaska		1945	Historical	Historical			Clothing - Man's parka							National Museum of Denmark
TRF-02-32	P26.2			Feuerborn, T.R.	Copenhagen/Stockholm		Yes	Dog	NA	NA	Yes	0.1646	NA	NA	Canada	Labrador	Labrador (Coast)		1924	Historical	Historical			Clothing - Man's parka							National Museum of Denmark
TRF-02-33	P.229a			Feuerborn, T.R.	Copenhagen/Stockholm		Yes	Dog	NA	NA	Yes	NA	NA	NA	Canada	Labrador	Labrador (Coast)		1922	Historical	Historical			Clothing - Man's parka							National Museum of Denmark				Concentration too low for sequencing
TRF-02-34	P.231a			Feuerborn, T.R.	Copenhagen/Stockholm		Yes	Dog	NA	NA	Yes	0.1		NA	Canada	Labrador	Labrador		1922	Historical	Historical			Clothing - Man's parka							National Museum of Denmark
TRF-02-35	P.1358			Feuerborn, T.R.	Copenhagen/Stockholm		Yes	Dog	NA	NA	Yes	0	NA	NA	Canada		Mackenzie River		1936	Historical	Historical			Clothing - Woman's belt							National Museum of Denmark
TRF-02-36	Lu.930			Feuerborn, T.R.	Copenhagen/Stockholm		Yes	Dog	NA	NA	Yes	NA	NA	NA	Greenland	--	--		--	Historical	Historical			Clothing - Man's parka							National Museum of Denmark				Concentration too low for sequencing
TRF-02-37	L.5083			Feuerborn, T.R.	Copenhagen/Stockholm		Yes	Dog	NA	NA	Yes	10.94	A1b	A1b	Greenland	East Greenland	Tasiilak		1911	Historical	Historical			Clothing - Girls's stockings							National Museum of Denmark
TRF-02-38	L19.3			Feuerborn, T.R.	Copenhagen/Stockholm		Yes	Dog	NA	NA	Yes	85.86	A1b	A1b	Greenland	East Greenland	Tasiilak		1932	Historical	Historical			Clothing - Ear-muffs							National Museum of Denmark
TRF-02-39	L.2106			Feuerborn, T.R.	Copenhagen/Stockholm		Yes	Dog	NA	NA	Yes	0	NA	NA	Greenland		Kap York		1905	Historical	Historical			Clothing - Man's stockings							National Museum of Denmark
TRF-02-40				Feuerborn, T.R.	Copenhagen/Stockholm		Yes	Dog	NA	NA	Yes	6.09	A1a	NA	Greenland	West	--		1962	Historical	Historical			Clothing - Man's stockings							National Museum of Denmark
TRF-02-41				Feuerborn, T.R.	Copenhagen/Stockholm		Yes	Dog	NA	NA	Yes	3.98	A1a	NA	Greenland	--	--		1980	Historical	Historical			Clothing - Woman's shoes							National Museum of Denmark
TRF-02-42	Lu.805			Feuerborn, T.R.	Copenhagen/Stockholm		Yes	Dog	NA	NA	Yes	0	NA	NA	Greenland	West	--		--	Historical	Historical			Clothing - Woman's parka							National Museum of Denmark
TRF-02-43	Lu.804			Feuerborn, T.R.	Copenhagen/Stockholm		Yes	Dog	NA	NA	Yes	NA	NA	NA	Greenland	West	--		--	Historical	Historical			Clothing - Woman's parka							National Museum of Denmark				Concentration too low for sequencing
TRF-02-44	Lu.808			Feuerborn, T.R.	Copenhagen/Stockholm		Yes	Dog	NA	NA	Yes	2.2	NA	NA	Greenland	West	--		--	Historical	Historical			Clothing - Man's parka							National Museum of Denmark
TRF-02-45	Lu.800			Feuerborn, T.R.	Copenhagen/Stockholm		Yes	Dog	NA	NA	Yes	2.2	NA	NA	Greenland	West	--		--	Historical	Historical			Clothing - Woman's parka							National Museum of Denmark
TRF-02-46	Ld.8a			Feuerborn, T.R.	Copenhagen/Stockholm		Yes	Dog	NA	NA	Yes	0.0227	NA	NA	Greenland	West	--		1870	Historical	Historical			Clothing - Woman's parka							National Museum of Denmark
TRF-02-47	L.9357			Feuerborn, T.R.	Copenhagen/Stockholm		Yes	Dog	NA	NA	Yes	0.1	NA	NA	Greenland		Uummannaq		1926	Historical	Historical			Clothing - Boy's stockings							National Museum of Denmark
TRF-02-63	Kd.13			Feuerborn, T.R.	Copenhagen/Stockholm		Yes	Dog	NA	NA	Yes	NA	NA	NA	Siberia	Neutinsk	Nenets/Khanti (Neutinsk)		1881	Historical	Historical			Clothing - Woman's hood							National Museum of Denmark				Concentration too low for sequencing
TRF-02-66	L.2103			Feuerborn, T.R.	Copenhagen/Stockholm		Yes	Dog	NA	NA	Yes	NA	NA	NA	Greenland	North	Kap York		1905	Historical	Historical			Clothing - Man's stockings							National Museum of Denmark				Concentration too low for sequencing
TRF-02-67	K.3-13			Feuerborn, T.R.	Copenhagen/Stockholm		Yes	Dog	NA	NA	Yes	NA	NA	NA	Siberia		Nenets/Khanti		1927	Historical	Historical			Clothing - Woman's hood							National Museum of Denmark				Concentration too low for sequencing
TRF-02-68	P.229e			Feuerborn, T.R.	Copenhagen/Stockholm		Yes	Dog	NA	NA	Yes	NA	NA	NA	Canada	Labrador	Labrador (Coast)		1922	Historical	Historical			Clothing - Mittens							National Museum of Denmark				Concentration too low for sequencing
TRF-06-05	ZMK 16/1987	P80		Feuerborn, T.R.	Copenhagen/Stockholm		Yes	Dog	NA	NA	Yes	0.291505	NA	NA	Greenland	North East Greenland	Syd Kap		1650AD	Thule	Inuit										Natural History Museum of Denmark
TRF-06-07	ZMK 45/1995	P82		Feuerborn, T.R.	Copenhagen/Stockholm		Yes	Dog	NA	NA	Yes	0.533927	NA	NA	Greenland	West Greenland	Asummiut		14th-16th Century	Thule	Inuit										Natural History Museum of Denmark
TRF-06-09	ZMK 14/1934	P75		Feuerborn, T.R.	Copenhagen/Stockholm		Yes	Dog	NA	NA	Yes	0.359658	NA	NA	Greenland	South Greenland	Igdlutalik ved Narssaq		17th Century	Thule	Inuit										Natural History Museum of Denmark
TRF-06-10	ZMK 142/1972	P76		Feuerborn, T.R.	Copenhagen/Stockholm		Yes	Dog	NA	NA	Yes	0.0519519	NA	NA	Greenland	South Greenland	Igdlorpait		1475-1700AD	Thule	Inuit										Natural History Museum of Denmark
TRF-07-03	DMP04	16116:1		Feuerborn, T.R.	Copenhagen/Stockholm		Yes	Dog	NA	NA	Yes	4.78	A2a	NA	Canada	Labrador	Double Mer Point		18th Cent.	Historical	Historical										Memorial University of Newfoundland
TRF-07-04	DMP07	3715		Feuerborn, T.R.	Copenhagen/Stockholm		Yes	C.l.familiaris	NA	NA	Yes	0.06	NA	NA	Canada	Labrador	Double Mer Point		Late 18th Cent.	Thule/Historical	Historical										Memorial University of Newfoundland
TRF-07-08	DMP15	3407		Feuerborn, T.R.	Copenhagen/Stockholm		Yes	Dog/wolf	NA	NA	Yes	0.17	NA	NA	Canada	Labrador	Double Mer Point		18th Cent.	Thule/Historical	Historical										Memorial University of Newfoundland
TRF-07-12	DMP24	12887		Feuerborn, T.R.	Copenhagen/Stockholm		Yes	C.l.familiaris	NA	NA	Yes	0.01	NA	NA	Canada	Labrador	Double Mer Point		18th Cent.	Thule/Historical	Historical										Memorial University of Newfoundland
TRF-07-13	HI05	1660-1		Feuerborn, T.R.	Copenhagen/Stockholm		Yes	C.lupus	NA	NA	Yes	0.33	NA	NA	Canada	Labrador	Huntingdon Island		18th Cent.?	Thule/Historical	Historical										Memorial University of Newfoundland
TRF-07-14	HI07	3921		Feuerborn, T.R.	Copenhagen/Stockholm		Yes	C.l.familiaris	NA	NA	Yes	0.12	NA	NA	Canada	Labrador	Huntingdon Island		18th Cent.?	Thule/Historical	Historical										Memorial University of Newfoundland
U.Arizona-1	NA			Brown, S.K. (VGL)	UC Davis	10/8/2012	Yes	Wolf	Alaska2 (KF661066.1)	CCCCTATGTACGTCGTGCATTAATGGTTTGCCCCATGCATATAAGCATGTACATAATATTATATCCTTACATAGGACATATTAACTCAATCTCATAATTCACTGATCTATCAACAGTAATCGAATGCATATCACTTAGTCCAATAAGGGCTTAATCACCATGCCTCGAGAAACCATCAACCCTTGCTCGTAATGTCCCTCTTCTCGCTCCGGGCCCATACTAACGTGGGGGTTACTATCATGAAACTATACCTGGCATCTGGTTCTTACTTCAGGGCCATAACTTTATTTACTCCAATCCTACTAATTCTCGCAAATGGGACATCTCGATGGACTAATGACTAATCAGCCCATGATCACA	Yes	12.7	WOLF	NA	Alaska		Anaktuvuk Pass (Nunamiut)	n/a	AD 1950 - 1960s	Modern	Modern	surface find	Canis sp.	cranium	complete (LM2 sampled)	n/a	adult		short muzzle; trauma (pathology from mechanical loading) to posterior sagital crest, good dental health, posterior teeth moderately worn	Stiner, Mary K.	University of Arizona	Binford, Lewis C.	n/a
U.Arizona-2	NA			Brown, S.K. (VGL)	UC Davis	10/8/2012	Yes	Wolf	Alaska2 (KF661066.1)	CTGAAATTCTTCTTAAACTATTCCCTGACACCCCTACATTCATATATTGAATCACCCCTACTGTGCTATGTCAGTATCTCCAGGTAAACCCTTCTTCCCTCCCCCTATGTACGTCGTGCATTAATGGTTTGCCCCATGCATATAAGCATGTACATAATATTATATTCTTACATAGGACATATTAACTCAATCTCATAATTCACTGATCTATCAGCAGTAATCAAATGCATATCACTTAGTCCAATAAGGKCTTAATCACCATGCCTCGAGAAACCATCAACCCTTGCTCGTAATGTCCCTCTTCTCGCTCCGGGCCCATACTAACGTGGGGGTTACTATCATGAAACTATACCTGGCATCTGGTTCTTACCTCAGGGCCATAACTTTATTTACTCCAAT…	Yes	130.6	WOLF	NA	Alaska		Anaktuvuk Pass (Nunamiut)	n/a	AD 1950 - 1960s	Modern	Modern	surface find	Canis sp.	cranium	complete (RM2 sampled)	n/a	adult		long muzzle; moderate pathology in occipital and mastoid regions, some excessive wear on teeth, gum pathology in posterior left side, healed small round injury on front nasal joint	Stiner, Mary K.	University of Arizona	Binford, Lewis C.	n/a
U.Arizona-3	NA			Brown, S.K. (VGL)	UC Davis	10/8/2012	Yes	Wolf	Alaska2 (KF661066.1)	CTGAAATTCTTCTTAAACTATTCCCTGACACCCCTACATTCATATATTGAATCACCCCTACTGTGCTATGTCAGTATCTCCAGGTAAACCCTTCTTCCCTCCCCCTATGTACGTCGTGCATTAATGGTTTGCCCCATGCATATAAGCATGTACATAATATTATATTCTTACATAGGACATATTAACTCAATCTCATAATTCACTGATCTATCARCAGTAATCAAATGCATATCACTTAGTCCAATAAGGGCTTAATCACCATGCCTCGAGAAACCATCAACCCTTGCTCGTAATGTCCCTCTTCTCGCTCCGGGCCCATACTAACGTGGGGGTTACTATCATGAAACTATACCTGGCATCTGGTTCTTACCTCAGGGCCATAACTTTATTTACTCCAAT…	Yes	13.7	WOLF	NA	Alaska		Anaktuvuk Pass (Nunamiut)	n/a	AD 1950 - 1960s	Modern	Modern	surface find	Canis sp.	cranium	complete (RM2 sampled)	n/a	adult		long muzzle; rear molars severly worn, front canines have little wear, pathology to frontal bone and rear gums	Stiner, Mary K.	University of Arizona	Binford, Lewis C.	n/a
U.Arizona-4	NA			Brown, S.K. (VGL)	UC Davis	10/8/2012	Yes	Dog	A2a or A2b	CCCCTATGTACGTCGTGCATTAATGGTTTGCCCCATGCATATAAGCATGTACATAATATTATATCCTTACATAGGACATATTAACTCAATCTCATAATTCACTGATCTATCAACAGTAATCGAATGCATATCACTTAGTCCAATAAGGGCTTAATCACCATGCCTCGAGAAACCATCAACCCTTGCTCGTAATGTCCCTCTTCTCGCTCCGGGCCCATACTAACGTGGGGGTTACTATCATGAAACTATACCTGGCATCTGGTTCTTACTTCAGGGCCATAACTTTATTTACTCCAATCCTACTAATTCTCGCAAATGGGACATCTCGATGGACTAATGACTAATCAGCCCATGATCACA	No	NA	NA	NA	Alaska		Anaktuvuk Pass (Nunamiut)	n/a	AD 1950 - 1960s	Modern	Modern	surface find	Canis sp.	cranium	complete (RM2 sampled)	n/a	adult		short muzzle; mild pathology to occipital and mastoid areas, rear teeth moderately worn	Stiner, Mary K.	University of Arizona	Binford, Lewis C.	n/a
U.Arizona-5	NA			Brown, S.K. (VGL)	UC Davis	10/8/2012	Yes	Dog	Indeterminate	NNNNNNNNNNNNNNNNNNNNNNNNNNNNNNNNNNNNNNNNNNNNNNNNNNNNNNNNNNNNNNNNNNNNNNNNNNNNNNNNNNNNNNNNNNNNNNNNNNNNNTCCCCNTATGTACGTCGTGCATTAATGGTTTGCCCCATGCATATAAGCATGTACATAATATTATATCCTTACATAGGANCATATTAACTCAATCTCATAATTCACTGATCTATCAACAGTAATCGAATGCATATCACTTAGTCCAATAAGGGCTTAATCACCATGCCTCGAGAAACCATNNNCAACCCTTGCTCGTANATGTCCCTCTTCTCGCTCCGGGCCCATACTANACGTGGGGGTTACTATCATGAAACTATACCTGGCATCTGGNTTCTTACTTCAGGGCCANNNTNANACT…	No	NA	NA	NA	Alaska		Anaktuvuk Pass (Nunamiut)	n/a	AD 1950 - 1960s	Modern	Modern	surface find	Canis sp.	cranium	complete (LM2 sampled)	n/a	adult		short muzzle; pathology to frontal bone and gums, severely worn and broken teeth in upper jaw	Stiner, Mary K.	University of Arizona	Binford, Lewis C.	n/a
U.Arizona-6	NA			Brown, S.K. (VGL)	UC Davis	10/8/2012	Yes	Wolf	Alaska2 (KF661066.1)	NNNNNNNNNNNNNNNNNNNNNNNNNNNNNNNNNNNNNNNNNNNNNNNNNNNNNNNNNNNNNNNNNNNNNNNNNNNNNNNNNNNNNNNNNNNNNNNNNNNNNNNNNNNNNNNNNNNNNNNNNNNNNNNNNNNNNNNNNNNNNNNNNNNNNNNNNNNNNNNNNNNNNNNNNNNNNNNNNNNNNNNNNNNNNNNNNNNNNNNNNNNNNNNNNNNNNNNNNNNNNNNNNNNNNNNNNNNNNNNNNNNNNNNNNNNNNCTTAATCACCATGCCTCGAGAAACCATNNNCAACCCTTGCTCGTANATGTCCCTCTTCTCGCTCCGGGCCCATACTANACGTGGGGGTTACTATCATGAAACTATACCTGGCATCTGGNTTCTTACCTCAGGGCCANNNTNANACT…	Yes	46	WOLF	NA	Alaska		Anaktuvuk Pass (Nunamiut)	n/a	AD 1950 - 1960s	Modern	Modern	surface find	Canis sp.	cranium	complete (RM2 sampled)	n/a	adult		healed trauma to anterior brain case and frontal bones, several lethal bullet holes	Stiner, Mary K.	University of Arizona	Binford, Lewis C.	n/a
UA-ElephPt	NA			Brown, S.K. (VGL)	UC Davis	6/26/2012	No	Fail	Fail	NA	No	NA	NA	NA	Alaska	Buckland River	Elephant Point, Buckland River	n/a		Historical/Modern?	Historical	n/a	Canis sp.	tibia	proximal 1/2		adult			Brown, S.K.	UA Museum of the North	Geist, Otto	1961		did not have a UA museum number originally (assigned by Arctic Dog DNA Project)
UA1-1933-9631	NA			Brown, S.K. (VGL)	UC Davis	6/26/2012	No	Fail	Fail	NA	No	NA	NA	NA	Alaska	St. Lawrence Island	Kukulik, St. Lawrence Island	49-XSL-009, House 4	AD 1275 - 1795	Punuk/Thule	Inuit	13'2" on floor of entrance to 1st house under 4th house (with bone and ivory tools)	Canis sp.	tibia	complete	R	adult		damage to prox end	Brown, S.K.	UA Museum of the North	Geist, Otto	1933	Geist and Rainey 1936; Houlette 2009	sampled for radiocarbon dating (UAMN)
UA1-1933-9632	NA			Brown, S.K. (VGL)	UC Davis	6/26/2012	No	Fail	Fail	NA	No	NA	NA	NA	Alaska	St. Lawrence Island	Kukulik, St. Lawrence Island	49-XSL-009, House 4	AD 1275 - 1795	Punuk/Thule	Inuit	13'4.5" under house below 4th house (tagged 3648)	Canis sp.	mandible	complete (p4, m2)	L	adult		damage to coronoid process	Brown, S.K.	UA Museum of the North	Geist, Otto	1933	Geist and Rainey 1936; Houlette 2009	sampled for radiocarbon dating (UAMN)
UA1-1937	NA			Brown, S.K. (VGL)	UC Davis	6/18/2012	Yes	Fail	Fail	NA	Yes	0	NA	NA	Alaska	St. Lawrence Island	Kukulik, St. Lawrence Island	49-XSL-009, KZ-3 or 7		unknown	Inuit	KZ 3 or 7	Canis sp.	cranium	complete (R: P4, M2; L: P4, M2)	n/a	adult			Brown, S.K.	UA Museum of the North	Geist, Otto	1937	Geist and Rainey 1936; Houlette 2009	turbinates + M2 sampled
UA1-1939-1497	NA			Brown, S.K. (VGL)	UC Davis	6/18/2012	Yes	Dog	A2b	ATGTACGTCGTGCATTAATGGTTTGCCCCATGCATATAAGCATGTACATAATATTATATCCTTACATAGGACATATTAACTCAATCTCATAGTTCACTGATCTATCAACAGT-AATCGAATGCATATCACTTAGTCTAATAAGGGCTTAATCACCATGCCTCGAGAAACCATCAACCCTTGCTCGTAATGTCCCTCTTCTCGCTCCGGGCCCATACTAACGTGGGGGTTACTATCATGAAACTATACCTGGCATCTGGTTCTTACTTCAGGGCCATAA-CTTTATTTACTCCAATCCTACTAATTCTCGCAAATGGGACATCTCGATGGACTAATGACTAATCAGCCCATGATCACA	No	NA	NA	NA	Alaska	St. Lawrence Island	Kukulik, St. Lawrence Island	49-XSL-009, House 8	BC 55 - 125 AD	Old Bering Sea	Inuit	House 8 test cut, walls of house 8, 9'-13'	Canis sp.	mandible	complete (p4)	R	adult			Brown, S.K.	UA Museum of the North	Geist, Otto	1939	Geist and Rainey 1936; Houlette 2009
UA1-1939-1497-1	NA			Brown, S.K. (VGL)	UC Davis	6/18/2012	No	Fail	Fail	NA	No	NA	NA	NA	Alaska	St. Lawrence Island	Kukulik, St. Lawrence Island	49-XSL-009, House 8	BC 55 - 125 AD	Old Bering Sea	Inuit	House 8 test cut, walls of house 8, 9'-13'	Canis sp.	mandible	complete (m1)	R	adult			Brown, S.K.	UA Museum of the North	Geist, Otto	1939	Geist and Rainey 1936; Houlette 2009
UA1-1939-1497-2	NA			Brown, S.K. (VGL)	UC Davis	6/26/2012	Yes	Dog	A2b	GCTGAGATTCTTCTTAAACTATTCCCTGACACCCCTACATTCATATATTGAATCACCCCTACTGTGCTATGTCAGTATCTCCAGGTAAACCCTTCTCNCCCTCCCCNTATGTACGTCGTGCATTAATGGTTTGCCCCATGCATATAAGCATGTACATAATATTATATCCTTACATAGGANCATATTAACTCAATCTCATAGTTCACTGATCTACCAACAGTAATCGAATGCATATCACTTAGTCCAATAAGGGCTTAATCACCATGCCTCGAGAAACCATNNNCAACCCTTGCTCGTANATGTCCCTCTTCTCGCTCCGGGCCCATACTANACGTGGGGGTTACTATCATGAAACTATACCTGGCATCTGGNTTCTTACTTCAGGGCCANNNTNANACT…	Yes	6.8	A2b	NA	Alaska	St. Lawrence Island	Kukulik, St. Lawrence Island	49-XSL-009, House 8	BC 55 - 125 AD	Old Bering Sea	Inuit	House 8 test cut, walls of house 8, 9'-13'	Canis sp.	mandible	complete (m2)	R	adult		congenital absence of p1	Brown, S.K.	UA Museum of the North	Geist, Otto	1939	Geist and Rainey 1936; Houlette 2009
UA1-1939-1497-3	NA			Brown, S.K. (VGL)	UC Davis	6/26/2012	No	Fail	Fail	NA	No	NA	NA	NA	Alaska	St. Lawrence Island	Kukulik, St. Lawrence Island	49-XSL-009, House 8	BC 55 - 125 AD	Old Bering Sea	Inuit	House 8 test cut, walls of house 8, 9'-13'	Canis sp.	mandible	complete (m1, m2)	R	adult		m1 chipped	Brown, S.K.	UA Museum of the North	Geist, Otto	1939	Geist and Rainey 1936; Houlette 2009
UA1-1939-1497-4	NA			Brown, S.K. (VGL)	UC Davis	6/18/2012	Yes	Fail	Fail	NA	No	NA	NA	NA	Alaska	St. Lawrence Island	Kukulik, St. Lawrence Island	49-XSL-009, House 8	BC 55 - 125 AD	Old Bering Sea	Inuit	House 8 test cut, walls of house 8, 9'-13'	Canis sp.	mandible	complete (p2, p4-m2)	R	adult		congenital absence of p1; crowns chipped	Brown, S.K.	UA Museum of the North	Geist, Otto	1939	Geist and Rainey 1936; Houlette 2009
UA1-1939-1497-5	NA			Brown, S.K. (VGL)	UC Davis	6/26/2012	No	Fail	Fail	NA	No	NA	NA	NA	Alaska	St. Lawrence Island	Kukulik, St. Lawrence Island	49-XSL-009, House 8	BC 55 - 125 AD	Old Bering Sea	Inuit	House 8 test cut, walls of house 8, 9'-13'	Canis sp.	mandible	mesial 3/4 body (m2)	R	adult			Brown, S.K.	UA Museum of the North	Geist, Otto	1939	Geist and Rainey 1936; Houlette 2009
UA1-1941-1856	NA			Brown, S.K. (VGL)	UC Davis	5/29/2012	Yes	Dog	A2b	CTGAGATTCTTCTTAAACTATTCCCTGACACCCCTACATTCATATATTGAATCACCCCTACTGTGCTATGTCAGTATCTCCAGGTAAACCCTTCTCCCCTCCCCTATGTACGTCGTGCATTAATGGTTTGCCCCATGCATATAAGCATGTACATAATATTATATCCTTACATAGGACATATTAACTCAATCTCATAGTTCACTGATCTATCAACAGTAACCGAATGCATATCACTTAGTCCAATAAGGGCTTAATCACCATGCCTCGAGAAACCATCAACCCTTGCTCGTAATGTCCCTCTTCTCGCTCCGGGCCCATACTAACGTGGGGGTTACTATCATGAAACTATACCTGGCATCTGGTTCTTACTTCAGGGCCATAACTTTATTTACTCCAATC…	Yes	8.7	A2b	NA	Alaska	Kobuk River	Ahteut, Kobuk River	49-XBM-003	AD 1150 - 1270	early Thule?	Inuit	House Pit	Canis sp.	mandible	complete (p3-m2)	L	adult		broken coronoid process	Brown, S.K.	UA Museum of the North	Giddings, J. Louis	1941	Shirar 2011
UA1-1950-1789	NA			Brown, S.K. (VGL)	UC Davis	6/11/2012	No	Fail	Fail	NA	No	NA	NA	NA	Alaska		Hooper Bay Village	49-XHB-004	AD 1700 - 1830	Late Prehistoric/Protohistoric	Paleo-Inuit	surface find	Canis sp.	cranium	complete (R: C, P2,P4-M2; L: P2,P4, M2; 2 incisors)	n/a	adult		missing jugal, squamosal	Brown, S.K.	UA Museum of the North	Oswalt, Wendel	1950		teeth glued into sockets
UA1-1950-2093	NA			Brown, S.K. (VGL)	UC Davis	6/11/2012	Yes	Dog	Fail	NA	Yes	1.1	NA	NA	Alaska		Hooper Bay Village	49-XHB-004	AD 1700 - 1830	Late Prehistoric/Protohistoric	Paleo-Inuit	surface find	Canis sp.	cranium	complete (R: P4-M2; L: P4-M2)	n/a	adult	M (pronounced saggital crest)	hole in left auditory bulla	Brown, S.K.	UA Museum of the North	Oswalt, Wendel	1950
UA1-1950-2094	NA			Brown, S.K. (VGL)	UC Davis	6/25/2012	No	Fail	Fail	NA	No	NA	NA	NA	Alaska		Hooper Bay Village	49-XHB-004	AD 1700 - 1830	Late Prehistoric/Protohistoric	Paleo-Inuit	surface find	Canis sp.	cranium	complete (R: P4, M2; L: P4-M2)	n/a	adult		hole in left frontal	Brown, S.K.	UA Museum of the North	Oswalt, Wendel	1950		A(1-2)
UA1-1950-2110	NA			Brown, S.K. (VGL)	UC Davis	5/29/2012	No	Fail	Fail	NA	No	NA	NA	NA	Alaska		Hooper Bay Village	49-XHB-004	AD 1700 - 1830	Late Prehistoric/Protohistoric	Paleo-Inuit	surface find	Canis sp.	cranium	complete (R: P4-M2; L: P4)	n/a	adult		missing premaxilla	Brown, S.K.	UA Museum of the North	Oswalt, Wendel	1950		A(8-3)
UA1-1950-2111	NA			Brown, S.K. (VGL)	UC Davis	5/29/2012	No	Fail	Fail	NA	No	NA	NA	NA	Alaska		Hooper Bay Village	49-XHB-004	AD 1700 - 1830	Late Prehistoric/Protohistoric	Paleo-Inuit	surface find	Canis sp.	mandible	complete (p2-m2)	L	adult		congenital absence of p1; canine broken	Brown, S.K.	UA Museum of the North	Oswalt, Wendel	1950		UA2123
UA1-1950-2112	NA			Brown, S.K. (VGL)	UC Davis	6/11/2012	Yes	Dog	Fail	NA	Yes	1.5	NA	NA	Alaska		Hooper Bay Village	49-XHB-004	AD 1700 - 1830	Late Prehistoric/Protohistoric	Paleo-Inuit	surface find	Canis sp.	cranium	complete (R: C-M2; L: P1-M2; 4 incisors)	n/a	adult			Brown, S.K.	UA Museum of the North	Oswalt, Wendel	1950		teeth glued; very clean
UA1-1950-2113	NA			Brown, S.K. (VGL)	UC Davis	6/11/2012	Yes	Dog	A1b	NNNNNNNNNNNNNNNNNNNNNNNNNNNNNNNNNNNNNNNNNNNNNNNNNNNNNNNNNNNNNNNNNNNNNNNNNNNNNNNNNNNNNNNNNNNNNNNNNNCCCTCCCCNTATGTACGTCGTGCATTAATGGTTTGCCCCATGCATATAAGCATGTACATAATATTATATCCTTACATAGGANCATATTAACTCAATCTCATAGTTCACTGATCTATCAACAGTAATCAAATGCATATCACTTAGTCCAATAAGGGCTTAATCACCATGCCTCGAGAAACCATNNNCAACCCTTGCTCGTANATGTCCCTCTTCTCGCTCCGGGCCCATACTANACGTGGGGGTTACTATCATGAAACTATACCTGGCATCTGGNTTCTTACTTCAGGGCCANNNTNANACT…	Yes	0.8	NA	NA	Alaska		Hooper Bay Village	49-XHB-004	AD 1700 - 1830	Late Prehistoric/Protohistoric	Paleo-Inuit	surface find	Canis sp.	cranium	complete (R: P4, M2; L: P4, M2)	n/a	adult			Brown, S.K.	UA Museum of the North	Oswalt, Wendel	1950		tissue still adhered to cranium
UA1-1952-1159	NA			Brown, S.K. (VGL)	UC Davis	5/29/2012	Yes	Dog	A1b	ATGTACGTCGTGCATTAATGGTTTGCCCCATGCATATAAGCATGTACATAATATTATATCCTTACATAGGACATATTAACTCAATCTCATAGTTCACTGATCTATCAACAG-TAATCAAATGCATATCACTTAGTCCAATAAGGGCTTAATCACCATGCCTCGAGAAACCATCAACCCTTGCTCGTAATGTCCCTCTTCTCGCTCCGGGCCCATACTAACGTGGGGGTTACTATCATGAAACTATACCTGGCATCTGGTTCTTACTTCAGGGCCATAA-CTTTATTTACTCCAATCCTACTAATTCTCGCAAATGGGACATCTCGATGGACTAATGACTAATCAGCCCATGATCACA	Yes	5.6	NA	NA	Alaska	Lower Colville River	Oliktok Point, Lower Colville River	n/a	AD 1850 - 1950	Historical/Modern	Historical	surface find (Auliktuuk)	Canis sp.	mandible	complete (p2-m2)	L	adult (worn)		congenital absence of p1	Brown, S.K.	UA Museum of the North	Irving, William	1952	Irving, W.N. 1952. An archaeological reconnaissance of the Lower Colville River and Delta Regions: final report for submission to the Chief of Naval Research. University of Alaska, Fairbanks.
UA1-1952-1160	NA			Brown, S.K. (VGL)	UC Davis	11/26/2012	Yes	Dog	A1b	ATGTACGTCGTGCATTAATGGTTTGCCCCATGCATATAAGCATGTACATAATATTATATCCTTACATAGGACATATTAACTCAATCTCATAGTTCACTGATCTATCAACAG-TAATCAAATGCATATCACTTAGTCCAATAAGGGCTTAATCACCATGCCTCGAGAAACCATCAACCCTTGCTCGTAATGTCCCTCTTCTCGCTCCGGGCCCATACTAACGTGGGGGTTACTATCATGAAACTATACCTGGCATCTGGTTCTTACTTCAGGGCCATAA-CTTTATTTACTCCAATCCTACTAATTCTCGCAAATGGGACATCTCGATGGACTAATGACTAATCAGCCCATGATCACA	No	NA	NA	NA	Alaska	Lower Colville River	Oliktok Point, Lower Colville River	n/a	AD 1850 - 1950	Historical/Modern	Historical	surface find (Auliktuuk)	Canis sp.	mandible	distal 3/4 body (p2-m2)	L	adult		broken coronoid process	Brown, S.K.	UA Museum of the North	Irving, William	1952	Irving, W.N. 1952. An archaeological reconnaissance of the Lower Colville River and Delta Regions: final report for submission to the Chief of Naval Research. University of Alaska, Fairbanks.
UA1959-proj247	NA			Brown, S.K. (VGL)	UC Davis	6/19/2012	Yes	Dog	A1b	GCTGAGATTCTTCNNNNNNNNNNNNNNNNNNNNNNNNNNNNNNNNNNNNNNNNNNNNNNNNNNNNNNNNNNNNNNNNNNNNNNNNNNNNNNNNNNNNNNNNNNNNNNNNNNNNNNNNNNNNNNNNNNNNNNNNNNNNNNNNNNNNNNNNNNNNNNNNNNNNNNNNNNNNNNNNNNNNNNNNNNNNNNNNNNNNNNNNNNNNNNNNNNNNNNNNNNNNNNNNNNNNNNNNNNNNNNNNNNNNNNNNNNNNNNNNNNNNNNNNCCATGCCTCGAGAAACCATNNNCAACCCTTGCTCGTANATGTCCCTCTTCTCGCTCCGGGCCCATACTANACGTGGGGGTTACTATCATGAAACTATACCTGGCATCTGGNTTCTTACTTCAGGGCCANNNTNANACT…	Yes	2	NA	NA	Alaska	North Slope	Wainright Lagoon, North Slope	n/a		Historical/Modern Inupiaq	Historical	surface find	Canis sp.	mandible	complete (m1-2)	R	old adult (worn)		p1, p2 alveolar resorption	Brown, S.K.	UA Museum of the North	Geist, Otto	1959
UA2001-72-2	NA			Brown, S.K. (VGL)	UC Davis	5/29/2012	Yes	Dog	A1b	GCTGAAATTCTTCTTAAACTATTCCCTGACACCCCTACATTCATATATTGAATCACCCCTACTGTGCTATGTCAGTATCTCCAGGTAAACCCTTCTTNCCCTCCCCNTATGTACGTCGTGCATTAATGGTTTGCCCCATGCATATAAGCATGTACATAATATTATATCCTTACATAGGANCATATTAACTCAATCTCATAGTTCACTGATCTATCAACAGTAATCAAATGCATATCACTTAGTCCAATAAGGGCTTAATCACCATGCCTCGAGAAACCATNNNCAACCCTTGCTCGTANATGTCCCTCTTCTCGCTCCGGGCCCATACTANACGTGGGGGTTACTATCATGAAACTATACCTGGCATCTGGNTTCTTACTTCAGGGCCANNNTNANACT…	Yes	1.7	NA	NA	Alaska	Port Clarence, Norton Sound	Point Spencer, Port Clarence, Norton Sound	49-TEL-008(?)		Historical/Modern	Historical	n/a	Canis sp.	cranium	complete (all teeth but L P1)	n/a	adult		hold in back of brain case, both squamosals broken	Brown, S.K.	UA Museum of the North	unknown	unknown		possibly collected by Charles Lucier; hold to cranium likely from bullet
UA2001-73-1	NA			Brown, S.K. (VGL)	UC Davis	6/11/2012	No	Fail	Fail	NA	No	NA	NA	NA	Alaska	Kotzebue Sound	Deering, Kotzebue Sound	n/a		Historical/Modern	Historical	surface find?	Canis sp.	cranium	complete (R: P2-P4, M2; L: P4-M2)	n/a	adult (worn)		shot - 2 bullet holes in frontal/parietal	Brown, S.K.	UA Museum of the North	unknown	unknown		UA3710
UA2001-73-2	NA			Brown, S.K. (VGL)	UC Davis	6/19/2012	No	Fail	Fail	NA	No	NA	NA	NA	Alaska	Kotzebue Sound	Deering, Kotzebue Sound	n/a		Historical/Modern	Historical	surface find?	Canis sp.	cranium	complete (R: P1-M2; L: C-M2; 5 incisors)	n/a	adult			Brown, S.K.	UA Museum of the North	unknown	unknown		UA3676
UA2001-73-3	NA			Brown, S.K. (VGL)	UC Davis	5/29/2012	Yes	Dog	Indeterminate	NNNNNNNNNNNNNNNNNNNNNNNNNNNNNNNNNNNNNNNNNNNNNNNNNNNNNNNNNNNNNNNNNNNNNNNNNNNNNNNNNNNNNNNNNNNNNNNNNNNNNNCCCCNTATGTACGTCGTGCATTAATGGTTTGCCCCATGCATATAAGCATGTACATAATATTATATCCTTACATAGGANCATATTAACTCAATCTCATAATTCACTGATCTTTCAACAGTAATCGAATGCATATCACTTAGTCCAATAAGGGCTTAATCACCATGCCTCGAGAAACCATNNNCAACCCTTGCTCGTANATGTCCCTCTTCTCGCTCCGGGCCCATACTANACGTGGGGGTTACTATCATGAAACTATACCTGGCATCTGGNTTCTTACTTCAGGGCCANNNTNANACT…	Yes	1.2	NA	NA	Alaska	Kotzebue Sound	Deering, Kotzebue Sound	n/a		Historical/Modern	Historical	surface find?	Canis sp.	cranium	complete (R: C, P2-P4; L: C-P4, M2; 5 incisors)	n/a	adult (worn)		shot - 2 bullet holes in frontal; M1 alveolus resorbed	Brown, S.K.	UA Museum of the North	unknown	unknown		UA3675
UA2001-74-1	NA			Brown, S.K. (VGL)	UC Davis	6/25/2012	Yes	Dog	A2a	NNNNNNNNNNNNNNNNNNNNNNNNNNNNNNNNNNNNNNNNNNNNNNNNNNNNNNNNNNNNNNNNNNNNNNNNNNNNNNNNNNNNNNNNNNNNNNNNNNNNNNCCCCNTATGTACGTCGTGCATTAATGGTTTGCCCCATGCATATAAGCATGTACATAATATTATATCCTTACATAGGANCATATTAACTCAATCTCATAGTTCACTGATCTACCAACAGTAATCGAATGCATATCACTTAGTCCAATAAGGGCTTAATCACCATGCCTCGAGAAACCATNNNCAACCCTTGCTCGTANATGTCCCTCTTCTCGCTCCGGGCCCATACTANACGTGGGGGTTACTATCATGAAACTATACCTGGCATCTGGNTTCTTACTTCAGGGCCANNNTNANACT…	No	NA	NA	NA	Alaska	Extinct Village	Cape Nome, Extinct Village	49-SOL-001(?)		late Thule	Inuit	possibly the Old Beach Site or Nuk	Canis sp.	cranium	complete (R: P4-M1; L: P4-M1)	n/a	adult (worn)	M (pronounced sagital crest)		Brown, S.K.	UA Museum of the North	Geist, Otto	1946		UA7250; white powder
UA2001-74-2	NA			Brown, S.K. (VGL)	UC Davis	6/19/2012	No	Fail	Fail	NA	No	NA	NA	NA	Alaska	Extinct Village	Cape Nome, Extinct Village	49-SOL-001(?)		late Thule	Inuit	possibly the Old Beach Site or Nuk	Canis sp.	cranium	complete (R:P2, P4-M2; L: P4-M2)	n/a	adult (worn)			Brown, S.K.	UA Museum of the North	Geist, Otto	1946		UA7248; white powder; shellacked
UA2001-74-3	NA			Brown, S.K. (VGL)	UC Davis	6/19/2012	No	Fail	Fail	NA	No	NA	NA	NA	Alaska	Extinct Village	Cape Nome, Extinct Village	49-SOL-001(?)		late Thule	Inuit	possibly the Old Beach Site or Nuk	Canis sp.	cranium	maxilla/nasal (R: P1-P4; L: P2, P4)	n/a	adult			Brown, S.K.	UA Museum of the North	Geist, Otto	1946		UA7249; shellacked
UA2001-75-1	NA			Brown, S.K. (VGL)	UC Davis	6/25/2012	Yes	Dog	A1b	NNNNNNNNNNNNNNNNNNNNNNNNNNNNNNNNNNNNNNNNNNNNNNNNNNNNNNNNNNNNNNNNNNNNNNNNNNNNNNNNNNNNNNNNNNNNNNNNNNNNNNCCCCNTATGTACGTCGTGCATTAATGGTTTGCCCCATGCATATAAGCATGTACATAATATTATATCCTTACATAGGANCATATTAACTCAATCTCATAGTTCACTGATCTACCAACAGTAATCGAATGCATATCACTTAGTCCAATAAGGGCTTAATCACCATGCCTCGAGAAACCATNNNCAACCCTTGCTCGTANATGTCCCTCTTCTCGCTCCGGGCCCATACTANACGTGGGGGTTACTATCATGAAACTATACCTGGCATCTGGNTTCTTACTTCAGGGCCANNNTNANACT…	No	NA	NA	NA	Alaska	Recent Village	Cape Nome, Recent Village	49-SOL-070 or NOM-009 (?)	AD 1800 - 1900	Historical Inupiaq	Historical	"recent Eskimo village at sandspit across river"; surface find; Setuk or Ayasayuk	Canis sp.	cranium	complete (R: P4-M1; L: P3-4)	n/a	adult (worn)	M (pronounced sagital crest)	left squamosal missing	Brown, S.K.	UA Museum of the North	Geist, Otto	1946		UA7252; shellacked
UA2001-75-2	NA			Brown, S.K. (VGL)	UC Davis	6/25/2012	Yes	Dog	Fail	NA	Yes	3.9	NA	NA	Alaska	Recent Village	Cape Nome, Recent Village	49-SOL-070 or NOM-009 (?)	AD 1800 - 1900	Historical Inupiaq	Historical	"recent Eskimo village at sandspit across river"; surface find; Setuk or Ayasayuk	Canis sp.	cranium	complette (R: C, P4-M2; L: C-P4, M2; 5 incisors)	n/a	adult		left squamosal missing	Brown, S.K.	UA Museum of the North	Geist, Otto	1946		UA7253
UA2001-76-1	NA			Brown, S.K. (VGL)	UC Davis	6/19/2012	Yes	Dog	A1b	TCTTAATCACCATGCCTCGAGAAACCATCAACCCTTGCTCGTAATGTCCCTCTTCTCGCTCCGGGCCCATACTAACGTGGGGGTTACTATCATGAAACTATACCTGGCATCTGGTTCTTACTTCAGGGCCATAACTTTATTTACTCCAATCCTACTAATTCTCGCAGATGGGACATCTCGATGGACTAATGACTAATC	Yes	1.3	NA	NA	Alaska	Point Barrow	Nuwuk, Point Barrow	49-BAR-011		early Thule	Inuit	n/a	Canis sp.	cranium	complete (R: P4-M2; L: P4-M2)	n/a	adult		left squamosal broken	Brown, S.K.	UA Museum of the North	Geist, Otto	1959
UA2001-76-2	NA			Brown, S.K. (VGL)	UC Davis	6/19/2012	Yes	Dog	A1b	ATGTACGTCGTGCATTAATGGTTTGCCCCATGCATATAAGCATGTACATAATATTATATCCTTACATAGGACATATTAACTCAATCTCATAGTTCACTGATCTATCAACAG-TAATCAAATGCATATCACTTAGTCCAWWAAGGGCTTAATCACCATGCCTCGAGAAACCATCAACCCTTGCTCGTAATGTCCCTCTTCTCGCTCCGGGCCCATACTAACGTGGGGGTTACTATCATGAAACTATACCTGGCATCTGGTTCTTACTTCAGGGCCATAA-CTTTATTTACTCCAATCCTACTAATTCTCGCARATGGGACATCTCGATGGACTAATGACTAATCAGCCCATGATCACA	Yes	7.9	A1b	NA	Alaska	Point Barrow	Nuwuk, Point Barrow	49-BAR-011		early Thule	Inuit	n/a	Canis sp.	mandible	complete (p2, p4-m2)	R	adult		cut marks?	Brown, S.K.	UA Museum of the North	Geist, Otto	1959
UA2001-77-1	NA			Brown, S.K. (VGL)	UC Davis	6/25/2012	Yes	Dog	A2b	NNNNNNNNNNNNNNNNNNNNNNNNNNNNNNNNNNNNNNNNNNNNNNNNNNNNNNNNNNNNNNNNNNNNNNNNNNNNNNNNNNNNNNNNNNNNNNNNNNCCCTCCCCNTATGTACGTCGTGCATTAATGGCTTGCCCCATGCATATAAGCATGTACATAATATTATATCCTTACATAGGANCATATTAACTCAATCTCATAATTCACTGATCTATCAACAGTAATCGAATGCATATCACTTAGTCCAATAAGGGCTTAATCACCATGCCTCGAGAAACCATNNNCAACCCTTGCTCGTANATGTCCCTCTTCTCGCTCCGGGCCCATACTANACGTGGGGGTTACTATCATGAAACTATACCTGGCATCTGGNTTCTTACTTCAGGGCCANNNTNANACT…	No	NA	NA	NA	Alaska	Buckland River	Elephant Point, Buckland River	n/a		Modern?	Modern	surface find	Canis sp.	cranium	complete (R: C, P3-M2; L: P4-M2; 2 incisors)	n/a	adult			Brown, S.K.	UA Museum of the North	Lucier, Charles V.	unknown		UA3668
UA2001-78-4	NA			Brown, S.K. (VGL)	UC Davis	6/18/2012	No	Fail	Fail	NA	No	NA	NA	NA	Alaska	St. Lawrence Island	Kukulik, St. Lawrence Island	49-XSL-009		late Thule/Historic	Inuit	n/a	Canis lupus lupus?	cranium	complete (R: C, P1, P4-M2; L: C, P4-M2, 5 incisors)	n/a	adult			Brown, S.K.	UA Museum of the North	Geist, Otto	1948
UA2001-79-2	NA			Brown, S.K. (VGL)	UC Davis	6/18/2012	Yes	Dog	Fail	NA	Yes	7.9	A2a	NA	Alaska		NO INFORMATION	n/a		unknown	Unknown	n/a	Canis/Vulpes	cranium	complete (R: I1, P4, M2; L: P1, P3-4, M2)	n/a	adult		left squamosal broken	Brown, S.K.	UA Museum of the North	unknown	unknown
UA4667	NA			Brown, S.K. (VGL)	UC Davis	6/26/2012	Yes	Fail	Fail	NA	No	NA	NA	NA	Alaska	North Slope	Meade River, North Slope	n/a	AD 1950s	Modern	Modern	surface find	Vulpes sp.?	cranium	complete (R: P2-M2; L: P2-M2)	n/a	adult			Brown, S.K.	UA Museum of the North	Geist, Otto	1960		hunting/trapping camp
UA4667-1	NA			Brown, S.K. (VGL)	UC Davis	6/25/2012	No	Fail	Fail	NA	No	NA	NA	NA	Alaska	North Slope	Meade River, North Slope	n/a	AD 1950s	Modern	Modern	surface find	Canis sp.	cranium	complete (R: P4-M2; L: P4-M1)		adult		holes in frontal	Brown, S.K.	UA Museum of the North	Geist, Otto	1960		hunting/trapping camp
UA5072-1	NA			Brown, S.K. (VGL)	UC Davis	6/19/2012	Yes	Dog	A2a	ATGTACGTCGTGCATTAATGGTTTGCCCCATGCATATAAGCATGTACATAATATTATATCCTTACATAGGACATATTAACTCAATCTCATAGTTCACTGATCTACCAACAGT-AATTGAATGCATATCACTTAGTCCAATAAGGGCTTAATCACCATGCCTCGAGAAACCATCAACCCTTGCTCGTAATGTCCCTCTTCTCGCTCCGGGCCCATACTAACGTGGGGGTTACTATCATGAAACTATACCTGGCATCTGGTTCTTACTTCAGGGCCATAA-CTTTATTTACTCCAATCCTACTAATTCTCGCAAATGGGACATCTCGATGGACTAATGACTAATCAGCCCATGATCACA	Yes	1.7	NA	NA	Alaska	Old Village	Point Hope, Old Village	49-XPH-008	AD 1800 - 1900	Historical Inupiaq	Historical	surface find	Canis sp.	cranium	complete (R: P4, M2; L: M2)	n/a	adult		left jugal broken	Brown, S.K.	UA Museum of the North	Geist, Otto	1961	Rainey 1947	shellacked
UA5072-2	NA			Brown, S.K. (VGL)	UC Davis	6/25/2012	No	Fail	Fail	NA	No	NA	NA	NA	Alaska	Old Village	Point Hope, Old Village	49-XPH-008	AD 1800 - 1900	Historical Inupiaq	Historical	surface find	Canis sp.	cranium	complete (R: P2-M2; L: P2-M2)	n/a	adult		left premaxilla missing	Brown, S.K.	UA Museum of the North	Geist, Otto	1961	Rainey 1947	shellacked
UA5072-3	NA			Brown, S.K. (VGL)	UC Davis	6/26/2012	No	Fail	Fail	NA	No	NA	NA	NA	Alaska	Old Village	Point Hope, Old Village	49-XPH-008	AD 1800 - 1900	Historical Inupiaq	Historical	surface find	Canis sp.	cranium	complete (no teeth)	n/a	adult		right squamosal missing	Brown, S.K.	UA Museum of the North	Geist, Otto	1961	Rainey 1947	shellacked
UA5072-5	NA			Brown, S.K. (VGL)	UC Davis	6/19/2012	Yes	Dog	A11, A13, A142, A166, A123, A89	CCCCTATGTACGTCGTGCATTAATGGTTTGCCCCATGCATATAAGCATGTACATAATATTATATCCTTACATAGGACATATTAACTCAATCTCATAATTCACTGATCTATCAACAGTAATCGAATGCATATCACTTAGTCCAATAAGGGCTTAATCACCATGCCTCGAGAAACCATCAACCCTTGCTCGTAATGTCCCTCTTCTCGCTCCGGGCCCATACTAACGTGGGGGTTACTATCATGAAACTATACCTGGCATCTGGTTCTTACTTCAGGGCCATAACTTTATTTACTCCAATCCTACTAATTCTCGCAAATGGGACATCTCGATGGACTAATGACTAATCAGCCCATGATCACACA	Yes	0.9	NA	NA	Alaska	Old Village	Point Hope, Old Village	49-XPH-008	AD 1800 - 1900	Historical Inupiaq	Historical	surface find	Canis sp.	cranium	complete (R: P2-M2; L: P2-M2)	n/a	adult		both squamosals missing; hole in frontals	Brown, S.K.	UA Museum of the North	Geist, Otto	1961	Rainey 1947	shellacked
UA5072-7	NA			Brown, S.K. (VGL)	UC Davis	5/29/2012	Yes	Dog	A2b	ATGTACGTCGTGCATTAATGGTTTGCCCCATGCATATAAGCATGTACATAATATTATATCCTTACATAGGACATATTAACTCAATCTCATAGTTCACTGATCTACCAACAGTAATCGAATGCATATCACTTAGTCCAATAAGGGCTTAATCACCATGCCTCGAGAAACCATCAACCCTTGCTCGTAATGTCCCTCTTCTCGCTCCGGGCCCATACTAACGTGGGGGTTACTATCATGAAACTATACCTGGCATCTGGTTCTTACTTCAGGGCCATAACTTTATTTACTCCAATCCTACTAATTCTCGCAAATGGGACATCTCGATGGACTAATGACTAATCAGCCCATGATCACACAT	Yes	10.2	A2b	NA	Alaska	Old Village	Point Hope, Old Village	49-XPH-008	AD 1800 - 1900	Historical Inupiaq	Historical	surface find	Canis sp.	cranium	complete (R: P2-M2; L: P2-M2)	n/a	adult		both squamosals missing	Brown, S.K.	UA Museum of the North	Geist, Otto	1961	Rainey 1947	shellacked
UA5225	NA			Brown, S.K. (VGL)	UC Davis	6/11/2012	Yes	Fail	Fail	NA	No	NA	NA	NA	Alaska	North Slope	Point Barrow, North Slope	49-BAR-011		Historical/Modern?	Historical	surface find?	Canis sp.	cranium	complete (R: P1-M2; L: P1-4, M2)	n/a	adult (worn)		squamosal, jugals both missing	Brown, S.K.	UA Museum of the North	Geist, Otto	1960		shellacked
UA5231	NA			Brown, S.K. (VGL)	UC Davis	6/18/2012	Yes	Dog	A2b	CTGAGATTCTTCTTAAACTATTCCCTGACACCCCTACATTCATATATTGAATCACCCCTACTGTGCTATGTCAGTATCTCCAGGTAAACCCTTCTCCCCTCCCCTATGTACGTCGTGCATTAATGGTTTGCCCCATGCATATAAGCATGTACATAATATTATATCCTTACATAGGACATATTAACTCAATCTCATAGTTCACTGATCTATCAACAGTAACCGAATGCATATCACTTAGTCCAATAAGGGCTTAATCACCATGCCTCGAGAAACCATCAACCCTTGCTCGTAATGTCCCTCTTCTCGCTCCGGGCCCATACTAACGTGGGGGTTACTATCATGAAACTATACCTGGCATCTGGTTCTTACTTCAGGGCCATAACTTTATTTACTCCAATC…	Yes	13.1	A2b	A2b	Alaska	North Slope	Cape Dyer, North Slope	n/a	AD 1900 - 1950	Historical/Modern	Historical	1/4 mi E of Kipalog Creek; surface find	Canis sp.	cranium	complete (R: P2-M2; L: P1, P3-M2)	n/a	adult (worn)		surface weathered; broken R squamosal	Brown, S.K.	UA Museum of the North	Pruitt, W.	7/1960
UA64-95	NA			Brown, S.K. (VGL)	UC Davis	6/25/2012	Yes	Dog	A1b	ATTACGTCGTGCATATAAGCTTGCCCATCATATAAGCATGTACATAATATTATATCCTTACATAGGACATATTAACTCAATCTCATAGTTCACTGATCTATCAACAGTAATCAAATGCATATCACTTAGTCCAATAAGGGCTTAATCACCATGCCTCGAGAAACCATCAACCCTTGCTCGTAATGTCCCTCTTCTCGCTCCGGGCCCATACTAACGTGGGAGTTACTATCATGAAACTATACCTGGCATCTGGTTCTTACTTCAGGGCCATAACTTTATTTACTCCAATCCTACTAATTCTCGCAAATGGGACATCTCGATGGACTAATGACTAATCAGCCCATGATCACACA	Yes	1.6	NA	NA	Alaska	middle Tanana River valley	Minto Flats, middle Tanana River valley	n/a		Late Prehistoric	Paleo-Inuit	Test pit 2, 4" below surface	Canis sp.	cranium	complete (R: P4, M1; L: P4-M2)	n/a	adult (worn)		broken parietal/frontal	Brown, S.K.	UA Museum of the North	Mathews, J.	1964		shellacked
UA72-065	NA			Brown, S.K. (VGL)	UC Davis	6/18/2012	Yes	Dog	A2a	TCTTAATCACCATGCCTCGAGAAACCATCAACCCTTGCTCGTAATGTCCCTCTTCTCGCTCCGGGCCCATACTAACGTGGGGGTTACTATCATGAAACTATACCTGGCATCTGGTTCTTACTTCAGGGCCATAACTTTATTTACTCCAATCCTACTAATTCTCGCAGATGGGACATCTCGATGGACTAATGACTAATC	Yes	2.2; 0.7	NA	NA	Alaska		NO INFORMATION	n/a		Historical/Modern?	Historical	n/a	Canis sp.	???						Brown, S.K.	UA Museum of the North	unknown	unknown
UCDZL-1080	NA			Brown, S.K. (VGL)	UC Davis	3/8/2011	Yes	Dog	A2a	ATGTACGTCGTGCATTAATGGTTTGCCCCATGCATATAAGCATGTACATAATATTATATCCTTACATAGGACATATTAACTCAATCTCATAGTTCACTGATCTACCAACAGTAATCGAATGCATATCACTTAGTCCAATAAGGGCTTAATCACCATGCCTCGAGAAACCATCAACCCTTGCTCGTAATGTCCCTCTTCTCGCTCCGGGCCCATACTAACGTGGGGGTTACTATCATGAAACTATACCTGGCATCTGGTTCTTACTTCAGGGCCATAACTTTATTTACTCCAATCCTACTAATTCTCGCAAATGGGACATCTCGATGGACTAATGACTAATCAGCCCATGATCACACAT	No	NA	NA	NA	Greenland	Paris Fjord	Qaqaitsut, Paris Fjord	n/a	AD 1990s	Modern	Modern	surface find	Canis sp.	cranium	complete (turbinates)	n/a	adult		surface weathered	Darwent, C.M.	UC Davis Zooarchaeology	Darwent, C.M.	7/2009		nasal turbinates sampled
UCDZL-1081	NA			Brown, S.K. (VGL)	UC Davis	3/8/2011	Yes	Dog	A2a	ATGTACGTCGTGCATTAATGGTTTGCCCCATGCATATAAGCATGTACATAATATTATATCCTTACATAGGACATATTAACTCAATCTCATAGTTCACTGATCTACCAACAGTAATCGAATGCATATCACTTAGTCCAATAAGGGCTTAATCACCATGCCTCGAGAAACCATCAACCCTTGCTCGTAATGTCCCTCTTCTCGCTCCGGGCCCATACTAACGTGGGGGTTACTATCATGAAACTATACCTGGCATCTGGTTCTTACTTCAGGGCCATAACTTTATTTACTCCAATCCTACTAATTCTCGCAAATGGGACATCTCGATGGACTAATGACTAATCAGCCCATGATCACACAT	No	NA	NA	NA	Greenland	Marshall Bay	Innuarfissuaq, Marshall Bay	n/a	AD 1930 - 1990	Modern	Modern	surface find	Canis sp.	cranium	complete (turbinates)	n/a	adult		surface weathered	Darwent, C.M.	UC Davis Zooarchaeology	Foin, Jeremy C.	7/2009		nasal turbinates sampled
UCDZL-1082	NA			Brown, S.K. (VGL)	UC Davis	3/8/2011	Yes	Dog	A20	CCCCTATGTACGTCGTGCATTAATGGTTTGCCCCATGCATATAAGCATGTACATAATATTATATCCTTACATAGGACATATTAACTCAATCTCATAATTCACTGATCTTTCAACAGTAATCGAATGCATATCACTTAGTCCAATAAGGGCTTAATCACCATGCCTCGAGAAACCATCAACCCTTGCTCGTAATGTCCCTCTTCTCGCTCCGGGCCCATACTAACGTGGGGGTTACTATCATGAAACTATACCTGGCATCTGGTTCTTACTTCAGGGCCATAACTTTATTTACTCCAATCCTACTAATTCTCGCAAATGGGACATCTCGATGGACTAATGACTAATCAGCCCATGATCACACAT	No	NA	NA	NA	Greenland	Marshall Bay	Innuarfissuaq, Marshall Bay	n/a	AD 1930 - 1990	Modern	Modern	surface find	Canis sp.	cranium	complete (turbinates)	n/a	adult		surface weathered	Darwent, C.M.	UC Davis Zooarchaeology	Foin, Jeremy C.	7/2009		nasal turbinates sampled
WAL-B10-J16	NA			Brown, S.K. (VGL)	UC Davis	6/13/2014	Yes	Dog	A1b	NNNNNNNNNNNNNNNNNNNNNNNNNNNNNNNNNNNNNNNNNNNNNNNNNNNNNNNNNNNNNNNNNNNNNNNNNNNNNNNNNNNNNNNNNNNNNNNNNNCCCTCCCCNTATGTACGTCGTGCATTAATGGTTTGCCCCATGCATATAAGCATGTACATAATATTATATCCTTACATAGGANCATATTAACTCAATCTCATAGTTCACTGATCTATCAACAGTAATCAAATGCATATCACTTAGTCCAATAAGGGCTTAATCACCATGCCTCGAGAAACCATNNNCAACCCTTGCTCGTANATGTCCCTCTTCTCGCTCCGGGCCCATACTANACGTGGGGGTTACTATCATGAAACTATACCTGGCATCTGGNTTCTTACTTCAGGGCCANNNTNANACT…	Yes	0.9	NA	NA	Alaska	North Slope	Walakpa, North Slope	49-BAR-13	AD 650 - 1000	Birnirk	Inuit	Area B, Level 10; J16, Unit N 940-945/E 920-925	Canis sp.							Darwent, C.M.	Maxwell Museum UNM	Stanford, Dennis	1968/69	Stanford 1976
WAL-B10-J19A	NA			Brown, S.K. (VGL)	UC Davis	6/13/2014	Yes	Dog	A1b	GCTGAGATTCTTCTTAAACTATTCCCTGACACCCCTACATTCATATATTGAATCACCCCTACTGTGCTATGTCAGTATCTCCAGGTAAACCCTTCTCNCCCTCCCCNTATGTACGTCGTGCATTAATGGTTTGCCCCATGCATATAAGCATGTACATAATATTATATCCTTACATAGGANCATATTAACTCAATCTCACAGTTCACTGATCTATCAGCAGTAATCAAATGCATATCACTTAGTCCAATAAGGGCTTAATCACCATGCCTCGAGAAACCATNNNCAACCCTTGCTCGTANATGTCCCTCTTCTCGCTCCGGGCCCATACTANACGTGGGGGTTACTATCATGAAACTATACCTGGCATCTGGNTTCTTACTTCAGGGCCANNNTNANACT…	Yes	5.5	NA	NA	Alaska	North Slope	Walakpa, North Slope	49-BAR-13	AD 650 - 1000	Birnirk	Inuit	Area B, Level 10; J19, Unit N 940-945/E 935-940	Canis sp.							Darwent, C.M.	Maxwell Museum UNM	Stanford, Dennis	1968/69	Stanford 1976
WAL-B10-J19B	NA			Brown, S.K. (VGL)	UC Davis	6/13/2014	Yes	Wolf	Fail	NA	Yes	0.7	NA	NA	Alaska	North Slope	Walakpa, North Slope	49-BAR-13	AD 650 - 1000	Birnirk	Inuit	Area B, Level 10; J19, Unit N 940-945/E 935-940	Canis sp.							Darwent, C.M.	Maxwell Museum UNM	Stanford, Dennis	1968/69	Stanford 1976
WAL-B10-J19C	NA			Brown, S.K. (VGL)	UC Davis	6/13/2014	Yes	Fail	Fail	NA	No	NA	NA	NA	Alaska	North Slope	Walakpa, North Slope	49-BAR-13	AD 650 - 1000	Birnirk	Inuit	Area B, Level 10; J19, Unit N 940-945/E 935-940	Canis sp.							Darwent, C.M.	Maxwell Museum UNM	Stanford, Dennis	1968/69	Stanford 1976
WAL-B10-J19D	NA			Brown, S.K. (VGL)	UC Davis	6/13/2014	Yes	Fail	Fail	NA	No	NA	NA	NA	Alaska	North Slope	Walakpa, North Slope	49-BAR-13	AD 650 - 1000	Birnirk	Inuit	Area B, Level 10; J19, Unit N 940-945/E 935-940	Canis sp.							Darwent, C.M.	Maxwell Museum UNM	Stanford, Dennis	1968/69	Stanford 1976
WAL-B10-J19E	NA			Brown, S.K. (VGL)	UC Davis	6/13/2014	Yes	Dog	Fail	NA	Yes	0.2	NA	NA	Alaska	North Slope	Walakpa, North Slope	49-BAR-13	AD 650 - 1000	Birnirk	Inuit	Area B, Level 10; J19, Unit N 940-945/E 935-940	Canis sp.							Darwent, C.M.	Maxwell Museum UNM	Stanford, Dennis	1968/69	Stanford 1976
WAL-B10-J20	NA			Brown, S.K. (VGL)	UC Davis	6/13/2014	Yes	Dog	Fail	NA	Yes	0.4	NA	A2a	Alaska	North Slope	Walakpa, North Slope	49-BAR-13	AD 650 - 1000	Birnirk	Inuit	Area B, Level 10; J20, Unit N 940-945/E 940-945	Canis sp.							Darwent, C.M.	Maxwell Museum UNM	Stanford, Dennis	1968/69	Stanford 1976
WAL-B10-K17	NA			Brown, S.K. (VGL)	UC Davis	6/13/2014	Yes	Wolf	Indeterminate	NNNNNNNNNNNNNNNNNNNNNNNNNNNNNNNNNNNNNNNNNNNNNNNNNNNNNNNNNNNNNNNNNNNNNNNNNNNNNNNNNNNNNNNNNNNNNNNNNNCCCTCCCCNTATGTACGTCGTGCATTAGTGGTTTGCCCCATGCATATAAGCATGTACATAATATTATATCCTTACATAGGANCATATTAACTCAATCTCATANTCTACTGATCTATCAGCAGTAATCAAATGCATATCACTTAGTCCAATAAGGGCTTAATCACCATGCCTCGAGAAACNNNNNNNNNNNNNNNNNNNNNNNNNNNNNNNNNNNNNNNNNNNNNNNNNNNNNNNNNNNNNNNNNNNNNNNNNNNNNNNNNNNNNNNNNNNNNNNNNNNNNNNNNNNNNNNNNNNNNNNNNN…	Yes	0.3	NA	NA	Alaska	North Slope	Walakpa, North Slope	49-BAR-13	AD 650 - 1000	Birnirk	Inuit	Area B, Level 10; K17,	Canis sp.							Darwent, C.M.	Maxwell Museum UNM	Stanford, Dennis	1968/69	Stanford 1976
WAL-B10-K18	NA			Brown, S.K. (VGL)	UC Davis	6/13/2014	Yes	Dog	A2a	NNNNNNNNNNNNNNNNNNNNNNNNNNNNNNNNNNNNNNNNNNNNNNNNNNNNNNNNNNNNNNNNNNNNNNNNNNNNNNNNNNNNNNNNNNNNNNNNNNCCCTCCCCNTATGTACGTCGTGCATTAATGGTTTGCCCCATGCATATAAGCATGTACATAATATTATATCCTTACATAGGANCATATTAACTCAATCTCATAGTTCACTGATCTATCAACAGTAATCGAATGCATATCACTTAGTCCAATAAGGGCTTAATCACCATGCCTCGAGAAACCATNNNCAACCCTTGCTCGTANATGTCCCTCTTCTCGCTCCGGGCCCATACTANACGTGAGGGTTACTATCATGAAACTATACCTGGCATCTGGNTTCTTACTTCAGGGCCANNNTNANACT…	Yes	0.6	NA	NA	Alaska	North Slope	Walakpa, North Slope	49-BAR-13	AD 650 - 1000	Birnirk	Inuit	Area B, Level 10; K18,	Canis sp.							Darwent, C.M.	Maxwell Museum UNM	Stanford, Dennis	1968/69	Stanford 1976
WAL-B10-K19	NA			Brown, S.K. (VGL)	UC Davis	6/13/2014	Yes	Dog	A1b	NNNNNNNNNNNNNNNNNNNNNNNNNNNNNNNNNNNNNNNNNNNNNNNNNNNNNNNNNNNNNNNNNNNNNNNNNNNNNNNNNNNNNNNNNNNNNNNNNNNCCTCCCCNTATGTACGTCGTGCATTAATGGTTTGCCCCATGCATATAAGCATGTACATAATATTATATCCTTACATAGGANCATATTAACTCAATCTCATAGTTCACTGATCTATCAACAGTAATCAAATGCATATCACTTAGTCCAATAAGGGCTTAATCACCATGCCTCGAGAAACCATNNNCAACCCTTGCTCGTANATGTCCCTCTTCTCGCTCCGGGCCCATACTANACGTGGGGGTTACTATCATGAAACTATACCTGGCATCTGGNTTCTTACTTCAGGGCCANNNTNANACT…	Yes	0.2	NA	NA	Alaska	North Slope	Walakpa, North Slope	49-BAR-13	AD 650 - 1000	Birnirk	Inuit	Area B, Level 10; K19,	Canis sp.							Darwent, C.M.	Maxwell Museum UNM	Stanford, Dennis	1968/69	Stanford 1976
WAL-B9-J19	NA			Brown, S.K. (VGL)	UC Davis	6/13/2014	Yes	Dog	A2a	GCTGAGATTCTTCTTAAACTATTCCCTGACACCCCTACATTCATATATTGAATCACCCCTACTGTGCTATGTCAGTATCTCCAGGTAAACCCTTCTCNCCCTCCCCNTATGTACGTCGTGCATTAATGGTTTGCCCCATGCATATAAGCATGTACATAATATTATATCCTTACATAGGANCATATTAACTCAATCTCATAGTTCACTGATCTACCAACAGTAATCGAATGCATATCACTTAGTCCAATAAGGGCTTAATCACCATGCCTCGAGAAACCATNNNCAACCCTTGCTCGTANATGTCCCTCTTCTCGCTCCGGGCCCATACTANACGTGGGGGTTACTATCATGAAACTATACCTGGCATCTGGNTTCTTACTTCAGGGCCANNNTNANACT…	Yes	37	A2a	A2a	Alaska	North Slope	Walakpa, North Slope	49-BAR-13	AD 650 - 1000	Birnirk	Inuit	Area B, Level 9; J19, Unit N 940-945/E 935-940	Canis sp.							Darwent, C.M.	Maxwell Museum UNM	Stanford, Dennis	1968/69	Stanford 1976
WAL-B9-J20	NA			Brown, S.K. (VGL)	UC Davis	6/13/2014	Yes	Dog	A2a	CTGAGATTCTTCTTAAACTATTCCCTGACACCCCTACATTCATATATTGAATCACCCCTACTGTGCTATGTCAGTATCTCCAGGTAAACCCTTCTCCCCTCCCCTATGTACGTCGTGCATTARTGGTTTGCCCCATGCATATAAGCATGTACATAATATTATATCCTTACATAGGACATATTAACTCAATCTCACAATTCACTGATCTATCAGCAGTAATCAAATGCATATCACTTAGTCCAATAAGGGCTTAATCACCATGCCTCGAGAAACCATCAACCCTTGCTCGTAATGTCCCTCTTCTCGCTCCGGGCCCATACTAACGTGGGGGTTACTATCATGAAACTATACCTGGCATCTGGTTCTTACCTCAGGGCCATAACTTTATTTACTCCAATC…	Yes	15.7	A2a	NA	Alaska	North Slope	Walakpa, North Slope	49-BAR-13	AD 650 - 1000	Birnirk	Inuit	Area B, Level 9; J20, Unit N 940-945/E 940-945	Canis sp.							Darwent, C.M.	Maxwell Museum UNM	Stanford, Dennis	1968/69	Stanford 1976
WAL-B9-K15	NA			Brown, S.K. (VGL)	UC Davis	6/13/2014	Yes	Dog	A1b	NNNNNNNNNNNNNNNNNNNNNNNNNNNNNNNNNNNNNNNNNNNNNNNNNNNNNNNNNNNNNNNNNNNNNNNNNNNNNNNNNNNNNNNNNNNNNNNNNNCCCTCCCCNTATGTACGTCGTGCATTAATGGTTTGCCCCATGCATATAAGCATGTACATAATATTATATCCTTACATAGGANCATATTAACTCAATCTCATAGTTCACTGATCTATCAACAGTAATCAAATGCATATCACTTAGTCCAATAAGGGCTTAATCACCATGCCTCGAGAAACCATNNNCAACCCTTGCTCGTANATGTCCCTCTTCTCGCTCCGGGCCCATACTANACGTGGGGGTTACTATCATGAAACTATACCTGGCATCTGGNTTCTTACTTCAGGGCCANNNTNANACT…	Yes	0.5	NA	NA	Alaska	North Slope	Walakpa, North Slope	49-BAR-13	AD 650 - 1000	Birnirk	Inuit	Area B, Level 9; K15,	Canis sp.							Darwent, C.M.	Maxwell Museum UNM	Stanford, Dennis	1968/69	Stanford 1976
WAL-B9-K19	NA			Brown, S.K. (VGL)	UC Davis	6/13/2014	Yes	Dog	A2a	NNNNNNNNNNNNNNNNNNNNNNNNNNNNNNNNNNNNNNNNNNNNNNNNNNNNNNNNNNNNNNNNNNNNNNNNNNNNNNNNNNNNNNNNNNNNNNNNNNNCCTCCCCNTATGTACGTCGTGCATTAATGGTTTGCCCCATGCATATAAGCATGTACATAATATTATATCCTTACATAGGANCATATTAACTCAATCTCATAGTTCACTGATCTACCAACAGTAATCGAATGCATATCACTTAGTCCAATAAGGGCTTAATCACCATGCCTCGAGAAACCATNNNCAACCCTTGCTCGTANATGTCCCTCTTCTCGCTCCGGGCCCATACTANACGTGGGGGTTACTATCATGAAACTATACCTGGCATCTGGNTTCTTACTTCAGGGCCANNNTNANACT…	Yes	1.2	NA	NA	Alaska	North Slope	Walakpa, North Slope	49-BAR-13	AD 650 - 1000	Birnirk	Inuit	Area B, Level 9; K19,	Canis sp.							Darwent, C.M.	Maxwell Museum UNM	Stanford, Dennis	1968/69	Stanford 1976
