# Supplementary material for: Specialized sledge dogs accompanied Inuit dispersal across the North American Arctic
Source: Proc Biol Sci. 2019 Nov 27;286(1916):20191929. doi: 10.1098/rspb.2019.1929 (PMC6939252; doi:10.1098/rspb.2019.1929)
Supplement: Datasets S4 [file rspb20191929supp7.xlsx]

## Sheet: Sheet1
Sample number	Site	d13C	d15N	C:N	%C	%N	Source
12012.30.4	Nunalleq	-16.51	11.23	3.4	45.27	15.22	This Study
12014.41.18	Nunalleq	-14.91	15.55	3.3	45.31	15.93	This Study
13007.72.2	Nunalleq	-14.98	15.92	3.4	44.66	15.45	This Study
13015.56.1	Nunalleq	-14.21	16.27	3.4	47.36	16.07	This Study
13137.223.1	Nunalleq	-14.71	15.85	3.4	45.64	15.72	This Study
13146.229.1	Nunalleq	-14.68	16.03	3.3	44.35	15.59	This Study
14021.53.1	Nunalleq	-14.1	17	3.3	45.24	16.31	This Study
15125.42.1	Nunalleq	-14.78	14.85	3.3	45.65	16.19	This Study
15173.109.1	Nunalleq	-14.8	15.34	3.3	45.72	15.96	This Study
B-248-109	Nunalleq	-14.1	16	3.1			Mcmanus-Fry et al. 2016
B-248-169	Nunalleq	-16.4	15.1	3.4			Mcmanus-Fry et al. 2016
B-248-342	Nunalleq	-14.4	15.7	3.3			Mcmanus-Fry et al. 2016
B-248-343	Nunalleq	-14.4	15.7	3.1			Mcmanus-Fry et al. 2016
B-248-418	Nunalleq	-16	14.4	3.5			Mcmanus-Fry et al. 2016
B-248-419	Nunalleq	-14.5	14	3.2			Mcmanus-Fry et al. 2016
B-248-420	Nunalleq	-15.3	14.9	3.3			Mcmanus-Fry et al. 2016
B-248-421	Nunalleq	-15	15.5	3.3			Mcmanus-Fry et al. 2016
B-248-422	Nunalleq	-14.7	15.7	3.3			Mcmanus-Fry et al. 2016
B-248-423	Nunalleq	-15.9	15.4	3.5			Mcmanus-Fry et al. 2016
B-248-424	Nunalleq	-14.5	15.8	3.3			Mcmanus-Fry et al. 2016
B-248-425	Nunalleq	-15.7	17.3	3.3			Mcmanus-Fry et al. 2016
B-248-426	Nunalleq	-15.6	17.6	3.2			Mcmanus-Fry et al. 2016
B-248-427	Nunalleq	-15.3	15.5	3.3			Mcmanus-Fry et al. 2016
B-248-428	Nunalleq	-14.9	14.6	3.2			Mcmanus-Fry et al. 2016
B-248-429	Nunalleq	-15.1	15.4	3.3			Mcmanus-Fry et al. 2016
B-248-430	Nunalleq	-15.1	14.6	3.2			Mcmanus-Fry et al. 2016
B-248-431	Nunalleq	-14.6	15.4	3.2			Mcmanus-Fry et al. 2016
B-248-434	Nunalleq	-14.3	15.7	3.1			Mcmanus-Fry et al. 2016
B-248-436	Nunalleq	-15.3	13.7	3.3			Mcmanus-Fry et al. 2016
B-248-437	Nunalleq	-14.9	15	3.3			Mcmanus-Fry et al. 2016
B-248-438	Nunalleq	-14.8	15.6	3.3			Mcmanus-Fry et al. 2016
B-248-439	Nunalleq	-14.7	15.6	3.2			Mcmanus-Fry et al. 2016
B-248-440	Nunalleq	-15.2	15.7	3.3			Mcmanus-Fry et al. 2016
B-248-481	Nunalleq	-15.8	15.8	3.3			Mcmanus-Fry et al. 2016
B-248-528	Nunalleq	-17.2	14.4	3.4			Mcmanus-Fry et al. 2016
B-248-529	Nunalleq	-15.1	15.1	3.4			Mcmanus-Fry et al. 2016
B-248-530	Nunalleq	-15.5	14.6	3.6			Mcmanus-Fry et al. 2016
