# Supplementary material for: Specialized sledge dogs accompanied Inuit dispersal across the North American Arctic
Source: Proc Biol Sci. 2019 Nov 27;286(1916):20191929. doi: 10.1098/rspb.2019.1929 (PMC6939252; doi:10.1098/rspb.2019.1929)
Supplement: Datasets S5 [file rspb20191929supp8.xls]

## Sheet: TabS5_DeeringC14
Sample ID	Extract ID	Lab number	Site	14C age	δ13C	Calibrated Age BP	2-Sigma Cal	Context	Material
ZMK 113a/1950-P27	TRF-01-23	OxA-37984	Deering	287 ± 24	-18.28	435 to 353 BP, IntCal13			bone
ZMK 113a/1950-P28	TRF-01-24	OxA-37985	Deering	388 ± 152	-14.69	422 - BP, IntCal13			bone
BOIS #1	AL2989	Ua-51192	Silumiut	5251±39	-16.8	6179 to 5923 BP, 2 sigma			bone
BOIS #5	AL2991	Ua-51193	Silumiut	5780±33	-16.5	6660 to 6495 BP, 2 sigma			bone
BOIS #9	AL2994	Ua-51195	Silumiut	5511±45	-14.6	6404 to 6214 BP, 2 sigma			bone
BOIS #10	AL2995	Ua-51196	Silumiut	5954±47	-15.2	6896 to 6670 BP, 2 sigma			bone
		AA102344	Boisman II	331 ± 45	-17.9		AD 1460–1645	House 3 midden	caribou molar
		AA102345	Boisman II	374 ± 55	-17.6		AD 1445–1640	House 4	caribou metapodial
		AA102346	Boisman II	387 ± 45	-17.4		AD 1440–1635	House 8	caribou long bone shaft
		AA102347	Boisman II	473 ± 46	-16.9		AD 1390–1500	House 13 midden	caribou long bone shaft
