# Supplementary material for: Specialized sledge dogs accompanied Inuit dispersal across the North American Arctic
Source: Proc Biol Sci. 2019 Nov 27;286(1916):20191929. doi: 10.1098/rspb.2019.1929 (PMC6939252; doi:10.1098/rspb.2019.1929)
Supplement: Datasets S6 [file rspb20191929supp9.xlsx]

## Sheet: list_genomes-thule.txt
Sample_ID	Original_ID	Accession	Coverage	Info	Location
D_Mex	Mex_naked	SRS1135618	16.3	Mexican Naked Dog	Mexico
D_Leb79	LB79	SRS520071	9.9	Village Dog Lebanon	Lebanon
D_GerShep6	GS6	DoGSD	16.3	Germany Shepperd	Germany
D_GerShep3	GS3	DoGSD	15.9	Germany Shepperd	Germany
D_Leb85	LB85	SRS520072	10.5	Village Dog Lebanon	Lebanon
D_Green	Greenland81	SRS1129835	15.5	Greenland Sledge Dog	Unknown
D_Mal68	Ala_malamute68	SRS1129580	15.8	Alaskan Malamute	Alaska, USA
D_Husky	husky01	SRS984799	61.8	Husky	Unknown
D_Husky89	Sib_husky89	SRS1135615	13.9	Siberian Husky	Siberia
D_Husky89	Sib_husky89	SRS1135615	13.9	Siberian Husky	Siberia
D_AHusky91	Ala_husky91	ERS747137	13.4	Alaskan Husky	Alaska
W_Yellow1	ysa	SRS661496	26.8	Wolf Yellowstone	Yellowstone, USA
W_Yellow2	ysb	SRS661497	25.7	Wolf Yellowstone	Yellowstone, USA
W_Mex1	mxa	SRS661490	24.7	Wolf Mexico	Mexico
C_Cal	cac	SRS661477	32.8	Coyote	California, USA
C_MidW	mwc	SRS661479	8.4	Coyote	Midwest, USA
AndeanFox	Lcu2	SRS523207	12.1	Andean Fox	Andes
W_Taimyr	Taimyr	PRJEB7788	1.3	Wolf Taimyr (ancient)	Taimyr Peninsula (Siberia)
W_Spa	spw	SRS661495	23.5	Wolf Spain	Spain
W_Port	ptw	SRS661492	31.4	Wolf Portugal	Portugal
W_Altai	LUPWRUS00001	DoGSD	11.3	Wolf Altai	Altai
W_Iran	irw	SRS661488	27.3	Wolf Iran	Iran
W_India	inw	SRS661487	43.6	Wolf India	India
W_Mongo	LUPWCHN00001	DoGSD	9.2	Wolf Mongolia	Mongolia
D_Viet59	VN59	SRS520088	10.6	Village Dog Vietnam	Vietnam
D_Viet21	VN21	SRS520084	10.9	Village Dog Vietnam	Vietnam
D_Dingo	Dingo	DoGSD	6.7	Dingo	Australia
D_China9	LJ9	DoGSD	16.8	Village Dog China	China
D_Tibet3	DQ3	DoGSD	14.9	Tibetan Village Dog	Tibet
D_Tibet4	DQ4	DoGSD	15.5	Tibetan Village Dog	Tibet
D_TMastif5	TM5	DoGSD	15.1	Tibetan Mastiff	Tibet
D_TMastif4	TM4	DoGSD	13.7	Tibetan Mastiff	Tibet
D_China8	LJ8	DoGSD	16.3	Village Dog China	China
D_India168	ID168	SRS520064	10	Indian Village Dog	India
D_India60	ID60	SRS520065	15.5	Indian Village Dog	India
D_SLaika	Sib_laika	SRS1129824	16.6	Siberian Laika	Siberia
D_Basenji	Basenji	DoGSD	6.3	Basenji	Africa
D_Na89	NA89	SRS520075	7.6	Village Dog Namibia	Namibia
D_Na8	NA8	SRS520075	15.2	Village Dog Namibia	Namibia
D_Na89	NA89	SRS520075	7.6	Village Dog Namibia	Namibia
D_Qatar5	QA5	SRS520082	7.5	Village Doge Qatar	Qatar
D_Qatar27	QA27	SRS520081	12.9	Village Doge Qatar	Qatar
D_NGDG	NGDG	ERS1097373	33.6	Newgrange Dog (Ancient)	Ireland
D_Port61	PT61	SRS520079	18.6	Village Dog Portugal	Portugal
D_Portt71	PT71	SRS520080	16.2	Village Dog Portugal	Portugal
D_Peru	Peru_naked	SRS1135617	17.5	Peruvian Naked Dog	Peru
AL3194	AL3194	ERS1849291	1.9	Pre-contact dog	Canada
AL3223	AL3223	ERS1849293	0.45	Pre-contact dog	USA
C_79T	79T	ERS403441	95.06	CTVT	Brazil
C_24T	24T	ERS403439	124.19	CTVT	Australia
